# Supplementary material
Source: Royal Society of Chemistry journal article supplement (doi:10.1039/d6nj00940a)
Supplement: d6nj00940a1.pdf [file d6nj00940a1.pdf]

*Supporting Information*

**DFT Study of Manganese Complex-Catalyzed Alcohol  
Cross-Coupling Reactions**

**Junjie Xiao, Lina Geng, Yanlong Kang, Yan Li\*, Zhiqiang Zhang**

*School of Chemical Engineering, University of Science and Technology Liaoning,  
Qianshan Road 185, Anshan 114051, China*

***Corresponding person: Yan Li***

***E-mail: yanli@ustl.edu.cn***

***Telephone: +86-412-5929627***

***Fax: +86-412-5929627***

# Content

|                                                                            |           |
|----------------------------------------------------------------------------|-----------|
| <b>1. Test results of different functionals .....</b>                      | <b>S1</b> |
| <b>2. Free energy profiles of processes 1 .....</b>                        | <b>S2</b> |
| <b>3. Possible reaction pathways of process 1.....</b>                     | <b>S3</b> |
| <b>4. Hydrogen and alcohol release sequence in processes 1 and 2 .....</b> | <b>S4</b> |
| <b>5. Energies of all the structures.....</b>                              | <b>S6</b> |
| <b>6. Cartesian coordinates of all the structures .....</b>                | <b>S8</b> |

## 1. Test results of different functionals

**Table S1.** The relative Gibbs free energies (in kcal/mol) of rate-controlling step with different DFT functionals.

| species      | M06L  | M06   | B3LYP-D3(BJ) | M06-2X-D3 | $\omega$ B97X-D |
|--------------|-------|-------|--------------|-----------|-----------------|
| <b>2a</b>    | 0.0   | 0.0   | 0.0          | 0.0       | 0.0             |
| <b>IM-C7</b> | -27.0 | -24.7 | -25.2        | -27.7     | -21.3           |
| <b>TS-C7</b> | -3.0  | -6.8  | -8.6         | -15.4     | -10.4           |

## 2. Free energy profiles of processes 1

**Fig. S1.** The Gibbs free energy profiles of the coordination of amines with manganese center in process 1, the relative energies are given in kcal/mol.

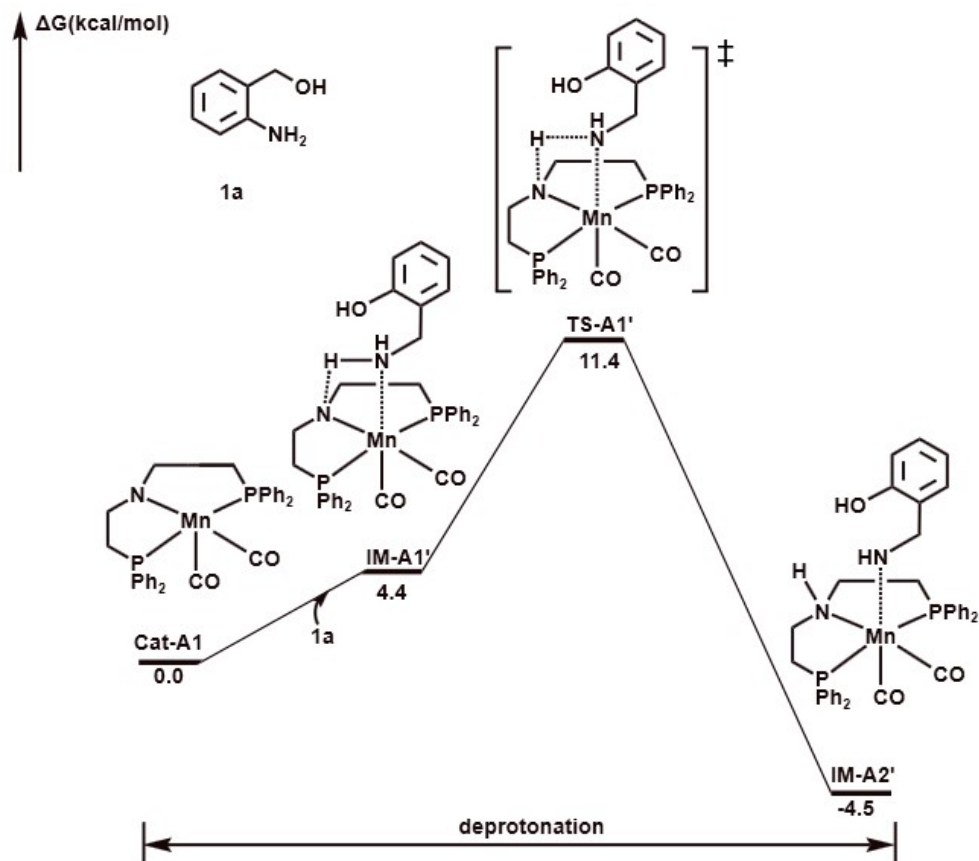

### 3. Possible reaction pathways of process 1

**Fig. S2.** The Gibbs free energy profiles of the coordination of amines and alcohol with manganese in processes 1, the relative energies are given in kcal/mol.

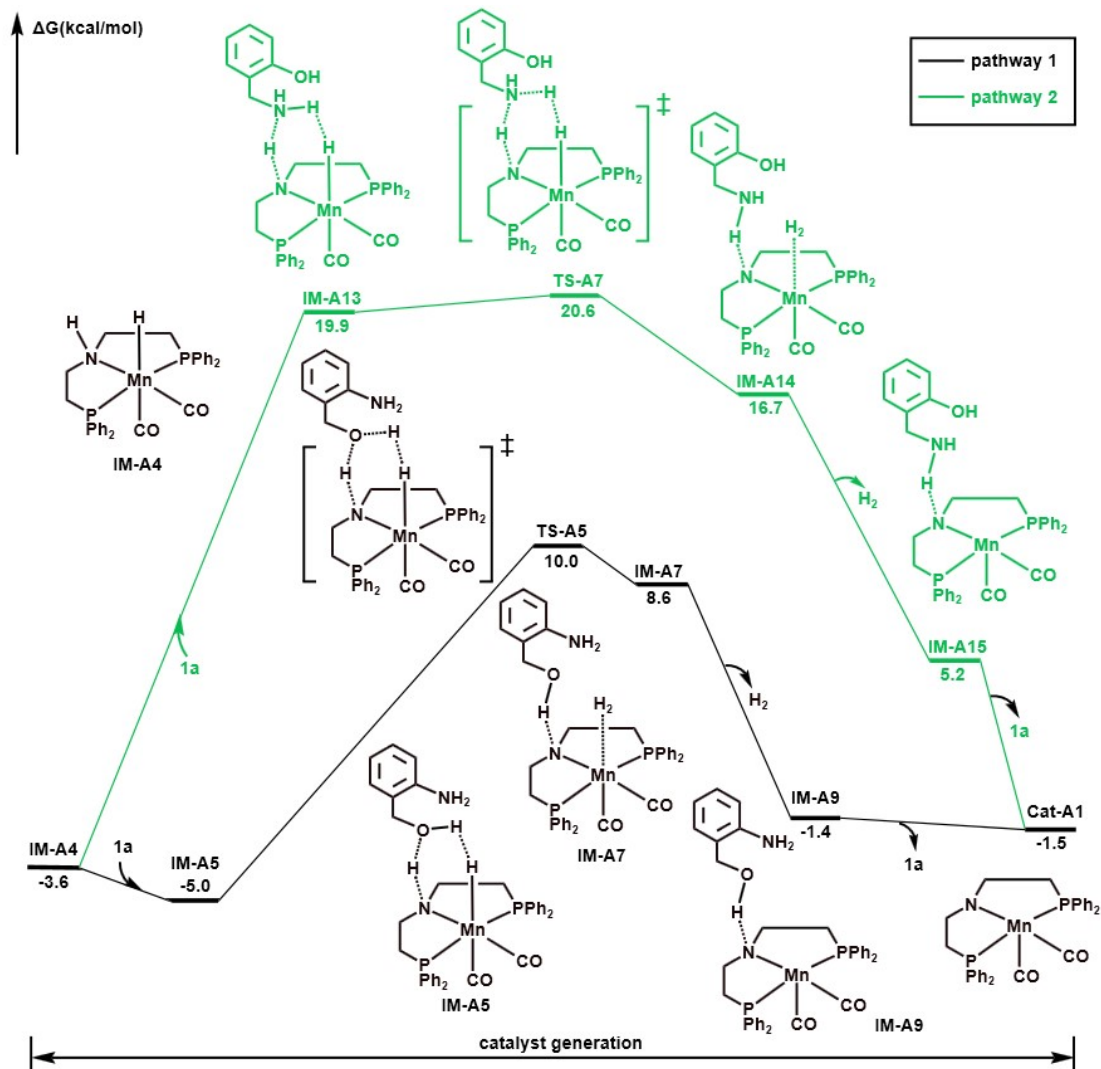

## 4. Hydrogen and alcohol release sequence in processes 1 and 2

**Fig. S3.** Possible pathways for catalyst regeneration in process 1, the relative energies are given in kcal/mol.

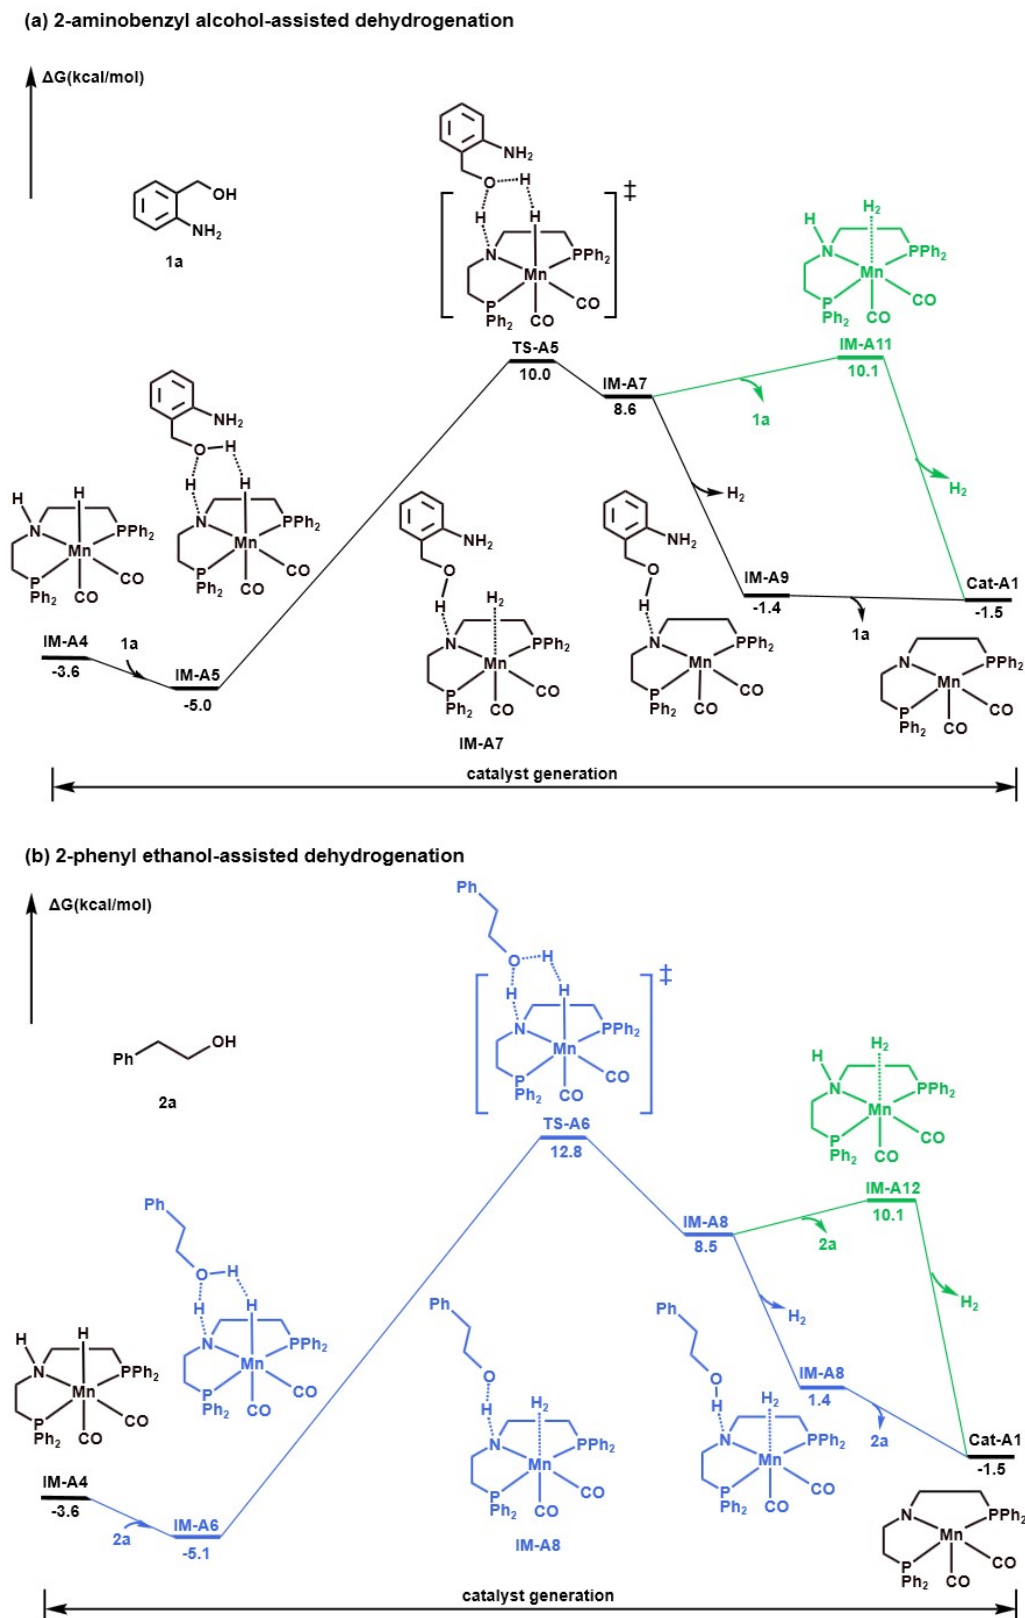

**Fig. S4** Possible pathways for catalyst regeneration in process 2, the relative energies are given in kcal/mol.

**(a) 2-aminobenzyl alcohol-assisted dehydrogenation**

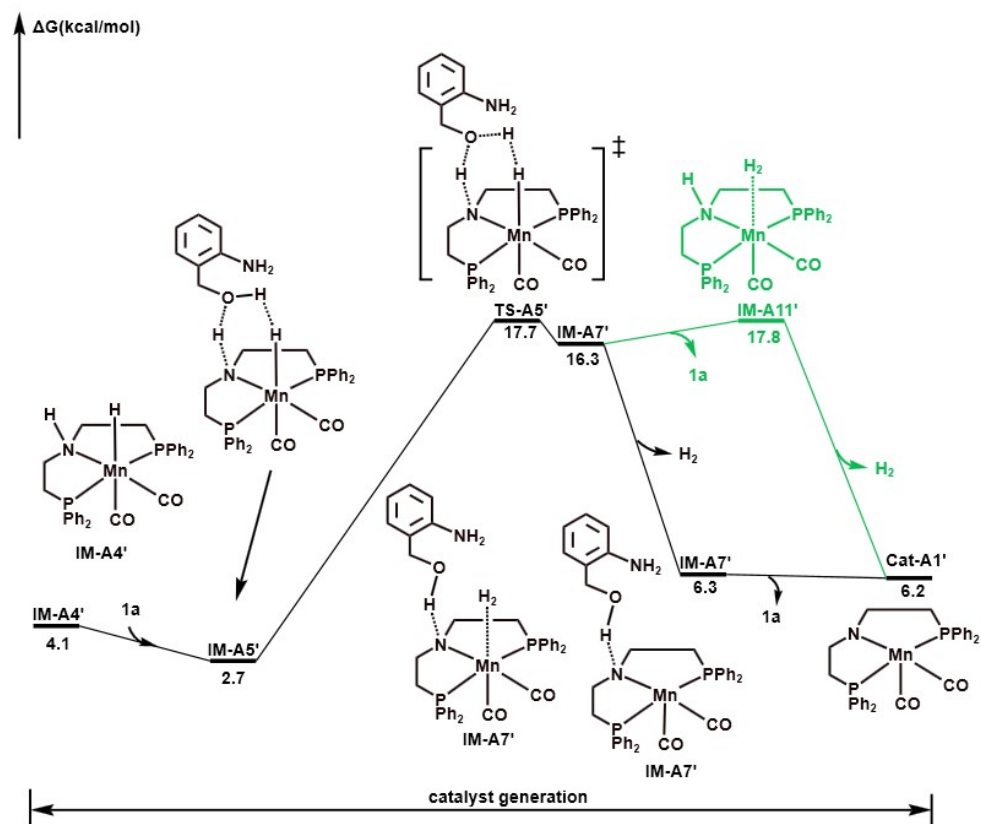

**(b) 2-phenyl ethanol-assisted dehydrogenation**

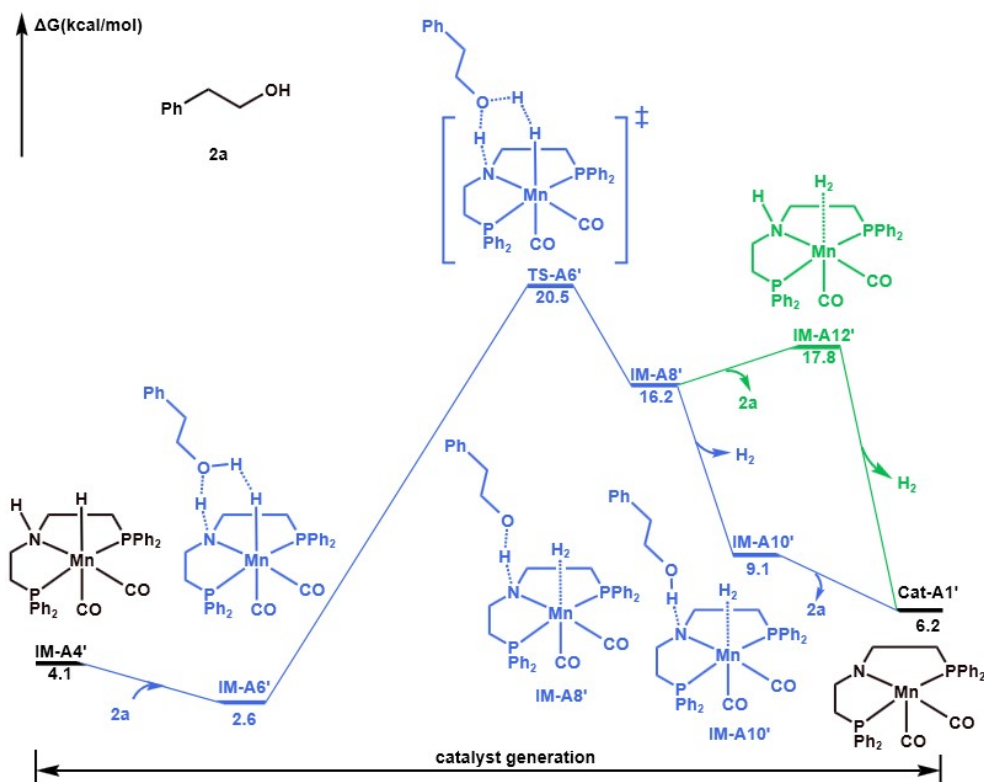

## 5. Energies of all the structures

**Table S2.** Calculated thermodynamic corrections ( $G_{cor}$ , in a.u.), single-point energies ( $E$ , in a.u.), Gibbs free energies ( $G$ , in a.u.), and relative Gibbs energies ( $\Delta G$ , in kcal/mol) (Calculated at 298.15 K and 1 atm).

| <i>species</i>   | <i>G<sub>cor</sub></i> | <i>E</i>     | <i>G</i>     | $\Delta G$ |
|------------------|------------------------|--------------|--------------|------------|
| <b>Cat-A1</b>    | 0.440757               | -3199.211173 | -3198.770416 | 0.0        |
| <b>IM-A1</b>     | 0.582843               | -3601.425489 | -3600.842646 | -0.6       |
| <b>IM-A2</b>     | 0.583695               | -3601.441869 | -3600.858174 | -10.3      |
| <b>IM-A3</b>     | 0.586921               | -3601.419258 | -3600.832337 | 5.9        |
| <b>IM-A4</b>     | 0.461656               | -3200.408498 | -3199.946842 | -3.6       |
| <b>IM-A5</b>     | 0.607427               | -3602.627840 | -3602.020413 | -5.0       |
| <b>IM-A6</b>     | 0.613881               | -3586.569604 | -3585.955723 | -5.1       |
| <b>IM-A7</b>     | 0.604048               | -3602.602797 | -3601.998749 | 8.6        |
| <b>IM-A8</b>     | 0.609661               | -3586.543735 | -3585.934074 | 8.5        |
| <b>IM-A9</b>     | 0.582190               | -3601.423730 | -3600.841540 | -1.4       |
| <b>IM-A10</b>    | 0.593991               | -3585.366245 | -3584.772254 | 1.4        |
| <b>IM-A11/12</b> | 0.455083               | -3200.380148 | -3199.925065 | 10.1       |
| <b>TS-A1</b>     | 0.578299               | -3601.423667 | -3600.845368 | -2.3       |
| <b>TS-A2</b>     | 0.580780               | -3601.402815 | -3600.822035 | 12.0       |
| <b>TS-A3</b>     | 0.454271               | -3200.371954 | -3199.917683 | 7.9        |
| <b>TS-A4</b>     | 0.454271               | -3200.371954 | -3199.917683 | 14.7       |
| <b>TS-A5</b>     | 0.599861               | -3602.596465 | -3601.996604 | 10.0       |
| <b>TS-A6</b>     | 0.610663               | -3586.538007 | -3585.927344 | 12.8       |
| <b>IM-B1</b>     | 0.594918               | -3585.371399 | -3584.776481 | 0.3        |
| <b>IM-B2</b>     | 0.604380               | -3585.383912 | -3584.788039 | -1.6       |
| <b>IM-B3</b>     | 0.595398               | -3585.361835 | -3584.766437 | 6.6        |
| <b>TS-B1</b>     | 0.592500               | -3585.369299 | -3584.776799 | 0.1        |
| <b>TS-B2</b>     | 0.597073               | -3585.347715 | -3584.750642 | 16.5       |
| <b>TS-B3</b>     | 0.590302               | -3585.357465 | -3584.767163 | 6.1        |
| <b>1b</b>        | 0.095055               | -400.995597  | -400.900542  | 0.0        |
| <b>IM-C1</b>     | 0.206377               | -634.141931  | -633.935554  | -20.2      |
| <b>IM-C2</b>     | 0.082207               | -400.417778  | -400.335571  | -20.3      |
| <b>IM-C3</b>     | 0.211101               | -785.364580  | -785.153479  | -16.8      |
| <b>IM-C4</b>     | 0.344159               | -1019.102101 | -1018.757942 | -19.5      |
| <b>IM-C5</b>     | 0.338912               | -1019.089431 | -1018.750519 | -14.9      |
| <b>IM-C6</b>     | 0.310704               | -942.640764  | -942.33006   | -25.7      |
| <b>IM-C7</b>     | 0.183803               | -708.915775  | -708.731972  | -27.0      |
| <b>IM-C8</b>     | 0.184568               | -708.908833  | -708.724265  | -22.2      |
| <b>IM-C9</b>     | 0.187738               | -708.891624  | -708.703886  | -9.4       |
| <b>IM-C10</b>    | 0.317953               | -942.633310  | -942.315357  | -16.5      |
| <b>IM-C11</b>    | 0.317694               | -942.607285  | -942.289591  | -3.0       |

|                                    |           |              |              |       |
|------------------------------------|-----------|--------------|--------------|-------|
| <b>IM-C12</b>                      | 0.317786  | -942.654023  | -942.336237  | -29.6 |
| <b>IM-C13</b>                      | 0.314275  | -942.652261  | -942.337986  | -30.7 |
| <b>3a</b>                          | 0.179325  | -633.052891  | -632.873566  | -15.7 |
| <b>TS-C1</b>                       | 0.206477  | -634.141912  | -633.935435  | -20.2 |
| <b>TS-C2</b>                       | 0.209302  | -785.361076  | -785.151774  | -15.7 |
| <b>TS-C3</b>                       | 0.338099  | -1019.083013 | -1018.744914 | -11.3 |
| <b>TS-C4</b>                       | 0.332363  | -1019.056257 | -1018.723894 | 1.8   |
| <b>TS-C5</b>                       | 0.183503  | -708.901677  | -708.718174  | -18.0 |
| <b>TS-C6</b>                       | 0.185538  | -708.888474  | -708.702936  | -8.8  |
| <b>TS-C7</b>                       | 0.313529  | -942.607561  | -942.294032  | -3.1  |
| <b>TS-C8</b>                       | 0.314799  | -942.645843  | -942.331044  | -26.4 |
| <b>1a</b>                          | 0.119538  | -402.190832  | -402.071294  | /     |
| <b>2a</b>                          | 0.128786  | -386.135283  | -386.006497  | /     |
| <b>2b</b>                          | 0.10321   | -384.92674   | -384.82353   | /     |
| <b><sup>t</sup>BuOH</b>            | 0.107622  | -233.707777  | -233.600155  | /     |
| <b><sup>t</sup>BuO<sup>-</sup></b> | 0.091839  | -233.094603  | -233.002764  | /     |
| <b>H<sub>2</sub></b>               | -0.001581 | -1.171556    | -1.173137    | /     |
| <b>H<sub>2</sub>O</b>              | 0.00325   | -76.44104    | -76.43779    | /     |

---

## 6. Cartesian coordinates of all the structures

### Cat-A1

|   |             |             |             |
|---|-------------|-------------|-------------|
| N | 0.00634100  | -0.99942300 | -0.95527400 |
| C | 2.44918400  | -1.00007300 | -1.18599200 |
| H | 2.53727100  | -0.35960400 | -2.07324100 |
| H | 3.34536000  | -1.62986300 | -1.11459100 |
| C | -2.34321100 | -0.68031400 | -1.56082200 |
| C | 0.20451300  | 2.25498400  | -0.28488100 |
| O | 0.34755600  | 3.37097900  | -0.62350600 |
| P | -2.21644900 | 0.41823700  | -0.09510100 |
| P | 2.20935500  | 0.10338500  | 0.26233800  |
| C | 2.68915900  | -0.97053500 | 1.66797700  |
| C | 3.97215700  | -0.96696600 | 2.22564600  |
| C | 1.72674400  | -1.85210100 | 2.17932000  |
| C | 4.28718700  | -1.82956400 | 3.27166900  |
| H | 4.72718500  | -0.27815400 | 1.84746500  |
| C | 2.04793200  | -2.72078300 | 3.21713200  |
| H | 0.71661100  | -1.83597500 | 1.76244000  |
| C | 3.32792000  | -2.70909800 | 3.76678600  |
| H | 5.28626100  | -1.81083800 | 3.70455800  |
| H | 1.29187400  | -3.40006800 | 3.60716800  |
| H | 3.57521700  | -3.37961400 | 4.58821100  |
| C | 3.53603000  | 1.34439700  | 0.18088000  |
| C | 4.70826600  | 1.12791700  | -0.55329600 |
| C | 3.38505300  | 2.54560600  | 0.88439100  |
| C | 5.70969600  | 2.09417600  | -0.58435600 |
| H | 4.84324900  | 0.19562700  | -1.10202800 |
| C | 4.38897800  | 3.50806000  | 0.85538300  |
| H | 2.47148300  | 2.72578100  | 1.45138600  |
| C | 5.55102100  | 3.28464800  | 0.12043100  |
| H | 6.61604100  | 1.91586700  | -1.16070200 |
| H | 4.25865500  | 4.44020700  | 1.40202900  |
| H | 6.33266300  | 4.04194400  | 0.09282600  |
| C | -3.07675900 | -0.46845000 | 1.24931400  |
| C | -3.16306000 | 0.13945000  | 2.51138200  |
| C | -3.61083500 | -1.75224300 | 1.08745000  |
| C | -3.78010800 | -0.51324700 | 3.57218100  |
| H | -2.74467300 | 1.13371800  | 2.66249300  |
| C | -4.21795000 | -2.40986100 | 2.15490700  |
| H | -3.55938600 | -2.25084000 | 0.12119300  |
| C | -4.30772100 | -1.79161600 | 3.39766900  |
| H | -3.84360200 | -0.02277500 | 4.54180400  |
| H | -4.62721400 | -3.40831200 | 2.00946000  |

|              |             |             |             |
|--------------|-------------|-------------|-------------|
| H            | -4.78661800 | -2.30402300 | 4.23012300  |
| C            | -3.31437500 | 1.82269700  | -0.49860500 |
| C            | -2.86275700 | 2.73638900  | -1.46047000 |
| C            | -4.57186600 | 2.01697000  | 0.08320500  |
| C            | -3.65357900 | 3.81591400  | -1.83627100 |
| H            | -1.87849800 | 2.60574100  | -1.90895200 |
| C            | -5.35806400 | 3.10498300  | -0.28859800 |
| H            | -4.93948200 | 1.31553300  | 0.83077200  |
| C            | -4.90219000 | 4.00502700  | -1.24735000 |
| H            | -3.28678900 | 4.51907800  | -2.58176700 |
| H            | -6.33346500 | 3.24686000  | 0.17394900  |
| H            | -5.51722600 | 4.85661000  | -1.53308900 |
| H            | -3.32197700 | -1.16377000 | -1.67532600 |
| H            | -2.19621300 | -0.02572500 | -2.42966200 |
| C            | 1.17608900  | -1.82310500 | -1.26006300 |
| H            | 1.24373100  | -2.67858800 | -0.55938800 |
| H            | 1.07729800  | -2.26961600 | -2.26534900 |
| C            | -1.19255500 | -1.66286900 | -1.46140500 |
| H            | -0.99213000 | -2.10474000 | -2.45404800 |
| H            | -1.46925700 | -2.51520000 | -0.80940500 |
| Mn           | 0.02216800  | 0.56283200  | 0.13926300  |
| C            | -0.04371500 | 1.00443100  | 1.83981100  |
| O            | -0.05872200 | 1.26165000  | 2.98680300  |
| <b>1a</b>    |             |             |             |
| O            | 2.40259500  | 0.79940700  | 0.79653300  |
| C            | 0.25043500  | 0.00515200  | -0.06228800 |
| C            | -0.43354500 | 1.24056400  | -0.12832400 |
| C            | -0.48089900 | -1.17051100 | 0.09002600  |
| C            | -1.83278600 | 1.24447700  | -0.05031900 |
| C            | -1.87128500 | -1.16292400 | 0.16558600  |
| H            | 0.06305800  | -2.11532600 | 0.14327000  |
| C            | -2.53977000 | 0.05650600  | 0.09016700  |
| H            | -2.36496500 | 2.19463200  | -0.10708700 |
| H            | -2.42289500 | -2.09318500 | 0.28171500  |
| H            | -3.62675500 | 0.08822400  | 0.14937700  |
| C            | 1.74283900  | -0.01580900 | -0.17943200 |
| H            | 2.06832100  | 0.40707100  | -1.13936800 |
| H            | 2.11390300  | -1.05285100 | -0.13522300 |
| H            | 2.07426300  | 0.51188700  | 1.66104100  |
| N            | 0.28772100  | 2.40858600  | -0.33225300 |
| H            | -0.21637900 | 3.25824200  | -0.11810800 |
| H            | 1.21286100  | 2.39055500  | 0.08527600  |
| <b>IM-A1</b> |             |             |             |
| N            | 0.06526200  | -1.27467200 | -1.21929100 |

|   |             |             |             |
|---|-------------|-------------|-------------|
| C | 2.48406900  | -1.42306700 | -1.24209200 |
| H | 2.56110100  | -0.81017400 | -2.15272000 |
| H | 3.36942000  | -2.07081900 | -1.20726100 |
| C | -2.33242400 | -0.98869800 | -1.45122000 |
| C | 0.22366400  | 1.57800400  | 1.36416600  |
| O | 0.28594900  | 2.46705800  | 2.13402900  |
| P | -2.10266600 | 0.24154400  | -0.09407200 |
| P | 2.35815600  | -0.24865400 | 0.16688400  |
| C | 3.00656800  | -1.13308100 | 1.62766400  |
| C | 3.05097100  | -0.43588300 | 2.84226100  |
| C | 3.36214000  | -2.48400300 | 1.60892000  |
| C | 3.46096900  | -1.07201100 | 4.00693300  |
| H | 2.74060600  | 0.60996400  | 2.87481500  |
| C | 3.76343200  | -3.12298200 | 2.78037400  |
| H | 3.31725800  | -3.05448800 | 0.68227300  |
| C | 3.81730700  | -2.41961900 | 3.97864100  |
| H | 3.49049800  | -0.51737200 | 4.94311700  |
| H | 4.03211100  | -4.17759500 | 2.75312100  |
| H | 4.12852000  | -2.92162800 | 4.89309300  |
| C | 3.65534600  | 1.00597500  | -0.14443600 |
| C | 4.77338800  | 0.72402800  | -0.93863000 |
| C | 3.52492100  | 2.28321900  | 0.41525600  |
| C | 5.73616000  | 1.70107900  | -1.17481800 |
| H | 4.89354800  | -0.26630300 | -1.37725700 |
| C | 4.49550700  | 3.25446100  | 0.18886000  |
| H | 2.64713800  | 2.52241700  | 1.01550700  |
| C | 5.59970900  | 2.96702800  | -0.60992700 |
| H | 6.59805900  | 1.47099400  | -1.79897200 |
| H | 4.38172200  | 4.24346500  | 0.62906000  |
| H | 6.35331000  | 3.73045000  | -0.79469700 |
| C | -3.21079100 | -0.26727000 | 1.26033500  |
| C | -3.44944900 | 0.64803800  | 2.29388700  |
| C | -3.73931500 | -1.55740500 | 1.36105100  |
| C | -4.21804900 | 0.28579200  | 3.39325500  |
| H | -3.02470700 | 1.65147000  | 2.23556300  |
| C | -4.50661000 | -1.91924200 | 2.46610800  |
| H | -3.54368000 | -2.29404800 | 0.58210700  |
| C | -4.75028000 | -0.99946200 | 3.48094900  |
| H | -4.39835000 | 1.00847400  | 4.18706100  |
| H | -4.91138900 | -2.92766100 | 2.53363800  |
| H | -5.34885100 | -1.28478400 | 4.34404300  |
| C | -2.90146400 | 1.76024000  | -0.73227200 |
| C | -2.28715400 | 3.00276500  | -0.54243500 |
| C | -4.11615400 | 1.70233200  | -1.42815100 |

|              |             |             |             |
|--------------|-------------|-------------|-------------|
| C            | -2.87430000 | 4.16437300  | -1.03851000 |
| H            | -1.33507500 | 3.05104800  | -0.01543100 |
| C            | -4.69817800 | 2.86240400  | -1.92996700 |
| H            | -4.61109800 | 0.74151800  | -1.57536900 |
| C            | -4.07718100 | 4.09566300  | -1.73542000 |
| H            | -2.38301900 | 5.12416700  | -0.89003800 |
| H            | -5.64149600 | 2.80508400  | -2.47112200 |
| H            | -4.53160900 | 5.00293700  | -2.12990600 |
| H            | -3.32143300 | -1.46480500 | -1.44187900 |
| H            | -2.24394100 | -0.42596800 | -2.39155700 |
| C            | 1.17765900  | -2.20238800 | -1.26592300 |
| H            | 1.15804600  | -2.92073700 | -0.41715900 |
| H            | 1.13134000  | -2.82013000 | -2.18319100 |
| C            | -1.19063300 | -1.98887600 | -1.34759500 |
| H            | -1.18133300 | -2.63156900 | -2.24896700 |
| H            | -1.36760700 | -2.67613800 | -0.49144900 |
| Mn           | 0.13302200  | 0.19756600  | 0.26266600  |
| C            | -0.06140400 | -0.94836500 | 1.56800800  |
| O            | -0.20816100 | -1.76230900 | 2.39735400  |
| O            | 0.10610400  | 1.22618000  | -1.69721100 |
| C            | 1.05179500  | 1.91020000  | -3.82031100 |
| C            | -0.13492100 | 2.18763400  | -4.53731900 |
| C            | 2.18650000  | 1.49018500  | -4.51184600 |
| C            | -0.12908500 | 2.04273100  | -5.93171900 |
| C            | 2.18724200  | 1.34924700  | -5.89690200 |
| H            | 3.09273900  | 1.28260600  | -3.93823600 |
| C            | 1.01829400  | 1.63269300  | -6.59958900 |
| H            | -1.03900900 | 2.26195800  | -6.49127500 |
| H            | 3.08451400  | 1.02550000  | -6.41949900 |
| H            | 0.99342900  | 1.52743200  | -7.68335400 |
| C            | 1.07824500  | 2.07243700  | -2.33584900 |
| H            | 0.80684600  | 3.09392000  | -2.02926800 |
| H            | 2.08453700  | 1.86699100  | -1.94380600 |
| H            | 0.18905800  | 0.25793600  | -2.00828100 |
| N            | -1.24908400 | 2.66251100  | -3.86413900 |
| H            | -2.11706100 | 2.62146100  | -4.38059700 |
| H            | -1.35447100 | 2.32339800  | -2.91369800 |
| <b>TS-A1</b> |             |             |             |
| N            | 0.07247600  | -1.20396100 | -1.22220400 |
| C            | 2.49598700  | -1.31103700 | -1.24596900 |
| H            | 2.57330000  | -0.66326500 | -2.13236400 |
| H            | 3.38625400  | -1.95240900 | -1.23351400 |
| C            | -2.32386400 | -0.90106700 | -1.45850000 |
| C            | 0.19952100  | 1.59917000  | 1.43511100  |

|   |             |             |             |
|---|-------------|-------------|-------------|
| O | 0.24212900  | 2.48513300  | 2.20801500  |
| P | -2.10398100 | 0.28485300  | -0.05746100 |
| P | 2.36204100  | -0.18869500 | 0.20782400  |
| C | 3.02339700  | -1.12089500 | 1.63253500  |
| C | 3.08028100  | -0.46300500 | 2.86851800  |
| C | 3.37518000  | -2.47152500 | 1.56860900  |
| C | 3.49431400  | -1.13789500 | 4.00956800  |
| H | 2.77814700  | 0.58357200  | 2.93689500  |
| C | 3.78118400  | -3.14933200 | 2.71628400  |
| H | 3.32439500  | -3.01239400 | 0.62449500  |
| C | 3.84414200  | -2.48551400 | 3.93638500  |
| H | 3.53311700  | -0.61341300 | 4.96267000  |
| H | 4.04634500  | -4.20339300 | 2.65329100  |
| H | 4.15770900  | -3.01803100 | 4.83245700  |
| C | 3.65314600  | 1.08009700  | -0.06937700 |
| C | 4.80225300  | 0.79751400  | -0.81782800 |
| C | 3.49113900  | 2.36184900  | 0.46984300  |
| C | 5.76554800  | 1.77913600  | -1.02939500 |
| H | 4.94606200  | -0.19677100 | -1.24060000 |
| C | 4.46260800  | 3.33827000  | 0.26821400  |
| H | 2.59010600  | 2.59956200  | 1.03521200  |
| C | 5.59817700  | 3.05036700  | -0.48462400 |
| H | 6.65143300  | 1.54922500  | -1.61897100 |
| H | 4.32505000  | 4.33130800  | 0.69223700  |
| H | 6.35232500  | 3.81765900  | -0.65002600 |
| C | -3.23106600 | -0.27034200 | 1.26142600  |
| C | -3.50866300 | 0.61920000  | 2.30796000  |
| C | -3.73204800 | -1.57365200 | 1.32888400  |
| C | -4.28725500 | 0.21843300  | 3.38670300  |
| H | -3.10610900 | 1.63290200  | 2.27575400  |
| C | -4.50959400 | -1.97406700 | 2.41311500  |
| H | -3.50794500 | -2.29103600 | 0.53954700  |
| C | -4.79091200 | -1.07993200 | 3.44113200  |
| H | -4.49785600 | 0.92131600  | 4.19077100  |
| H | -4.89259000 | -2.99238300 | 2.45407300  |
| H | -5.39717500 | -1.39520300 | 4.28832000  |
| C | -2.88814200 | 1.82383000  | -0.65866100 |
| C | -2.20395500 | 3.03886600  | -0.55112300 |
| C | -4.15877600 | 1.80669400  | -1.24944100 |
| C | -2.77540700 | 4.21472500  | -1.03093600 |
| H | -1.20974100 | 3.05151600  | -0.10729200 |
| C | -4.72544700 | 2.98109500  | -1.73459900 |
| H | -4.70892300 | 0.86763300  | -1.32450200 |
| C | -4.03280700 | 4.18676200  | -1.62667600 |

|    |             |             |             |
|----|-------------|-------------|-------------|
| H  | -2.22987400 | 5.15302100  | -0.94945000 |
| H  | -5.71212100 | 2.95673400  | -2.19479500 |
| H  | -4.47577100 | 5.10494600  | -2.00864000 |
| H  | -3.31211900 | -1.37817800 | -1.46526900 |
| H  | -2.23765900 | -0.30569200 | -2.37819900 |
| C  | 1.20315000  | -2.10932200 | -1.31199300 |
| H  | 1.17914500  | -2.85642300 | -0.49263700 |
| H  | 1.16783800  | -2.68561400 | -2.25518100 |
| C  | -1.18611200 | -1.90888500 | -1.39470700 |
| H  | -1.17010600 | -2.51133600 | -2.32220300 |
| H  | -1.35512500 | -2.62696200 | -0.56643700 |
| Mn | 0.12913500  | 0.23395100  | 0.31614500  |
| C  | -0.06024000 | -0.92894000 | 1.61166700  |
| O  | -0.20472600 | -1.75296900 | 2.43151800  |
| O  | 0.09201000  | 1.17968700  | -1.64486500 |
| C  | 1.03383100  | 1.73957900  | -3.79384600 |
| C  | -0.16055800 | 1.97007600  | -4.51457700 |
| C  | 2.16600900  | 1.29783300  | -4.47440500 |
| C  | -0.16602100 | 1.75208600  | -5.89930700 |
| C  | 2.15727300  | 1.08532600  | -5.85117500 |
| H  | 3.08044500  | 1.13180700  | -3.89901200 |
| C  | 0.97945100  | 1.31851200  | -6.55652300 |
| H  | -1.08310000 | 1.93417700  | -6.46093700 |
| H  | 3.05407500  | 0.74485900  | -6.36427200 |
| H  | 0.94582700  | 1.15611200  | -7.63311900 |
| C  | 1.06844700  | 1.97126600  | -2.31496600 |
| H  | 0.84112800  | 3.02228200  | -2.06838300 |
| H  | 2.07991000  | 1.76620800  | -1.93028200 |
| H  | 0.16140800  | 0.07432000  | -1.85312000 |
| N  | -1.27277800 | 2.47281000  | -3.85648800 |
| H  | -2.14591600 | 2.39076100  | -4.35936000 |
| H  | -1.35636300 | 2.18681400  | -2.88582400 |

### IM-A2

|   |             |             |             |
|---|-------------|-------------|-------------|
| N | -0.28964300 | -1.46169100 | -1.08401300 |
| C | 2.11841700  | -1.51449600 | -1.35611800 |
| H | 2.07921400  | -0.90789800 | -2.27311500 |
| H | 3.01499700  | -2.14426000 | -1.39847700 |
| C | -2.68792700 | -1.11397100 | -1.12488500 |
| C | 0.11488900  | 1.57548800  | 1.34959600  |
| O | 0.25491500  | 2.56213200  | 1.97022700  |
| P | -2.34721700 | 0.24263600  | 0.11096200  |
| P | 2.16007800  | -0.30962700 | 0.05731300  |
| C | 3.13251400  | -1.21039400 | 1.33127900  |
| C | 4.38023700  | -0.76249100 | 1.78321100  |

|   |             |             |             |
|---|-------------|-------------|-------------|
| C | 2.61065400  | -2.39137300 | 1.87784500  |
| C | 5.08426600  | -1.47807100 | 2.74851300  |
| H | 4.81031500  | 0.15225000  | 1.37970600  |
| C | 3.32069400  | -3.11163600 | 2.83186200  |
| H | 1.62696000  | -2.74343600 | 1.57475400  |
| C | 4.56068800  | -2.65578800 | 3.27242900  |
| H | 6.05020600  | -1.10964900 | 3.08989400  |
| H | 2.89473200  | -4.02546600 | 3.24212000  |
| H | 5.11274500  | -3.21349100 | 4.02679500  |
| C | 3.36993400  | 0.93931700  | -0.50225100 |
| C | 4.34227000  | 0.64922600  | -1.46641300 |
| C | 3.37729100  | 2.19972600  | 0.10843800  |
| C | 5.29442200  | 1.60085200  | -1.82093000 |
| H | 4.36277500  | -0.32718100 | -1.94804600 |
| C | 4.33372400  | 3.14900500  | -0.24216300 |
| H | 2.62527800  | 2.44003800  | 0.85981200  |
| C | 5.29198300  | 2.85206500  | -1.20906600 |
| H | 6.03796400  | 1.36411500  | -2.58007100 |
| H | 4.32375500  | 4.12610700  | 0.23689900  |
| H | 6.03478000  | 3.59724900  | -1.48796400 |
| C | -3.52067800 | -0.13488500 | 1.46257300  |
| C | -4.39154500 | 0.83151300  | 1.97856300  |
| C | -3.51433600 | -1.41260100 | 2.03788500  |
| C | -5.24157400 | 0.52246600  | 3.03725300  |
| H | -4.41021000 | 1.83097700  | 1.54604000  |
| C | -4.36930700 | -1.72189400 | 3.08949800  |
| H | -2.82180600 | -2.17050600 | 1.67220600  |
| C | -5.23593000 | -0.75384800 | 3.59240300  |
| H | -5.91392800 | 1.28486600  | 3.42693900  |
| H | -4.35147300 | -2.71993000 | 3.52357000  |
| H | -5.90170700 | -0.99374300 | 4.41945100  |
| C | -3.09145500 | 1.70557900  | -0.68181600 |
| C | -2.55694000 | 2.97300200  | -0.43010800 |
| C | -4.22231200 | 1.59599400  | -1.50288400 |
| C | -3.13050400 | 4.10609800  | -1.00134200 |
| H | -1.68154600 | 3.06890500  | 0.20979700  |
| C | -4.78811400 | 2.72794100  | -2.08009800 |
| H | -4.66958600 | 0.61890200  | -1.68794500 |
| C | -4.24039700 | 3.98502800  | -1.83198100 |
| H | -2.69760600 | 5.08511700  | -0.80511200 |
| H | -5.66123200 | 2.62909500  | -2.72296500 |
| H | -4.68003900 | 4.87016800  | -2.28784400 |
| H | -3.67348000 | -1.56953500 | -0.97284400 |
| H | -2.68946600 | -0.64290800 | -2.11830000 |

|    |             |             |             |
|----|-------------|-------------|-------------|
| C  | 0.86052700  | -2.35463600 | -1.25284900 |
| H  | 0.89815300  | -3.03358400 | -0.38955600 |
| H  | 0.73738900  | -2.98476800 | -2.15020100 |
| C  | -1.58213000 | -2.15070800 | -1.06633000 |
| H  | -1.66609300 | -2.85694800 | -1.91038500 |
| H  | -1.63316300 | -2.74596400 | -0.14296400 |
| Mn | -0.07972900 | 0.12435500  | 0.37763400  |
| C  | -0.21849300 | -0.88675200 | 1.81056400  |
| O  | -0.35484900 | -1.55956500 | 2.76555400  |
| O  | -0.12408600 | 1.04105800  | -1.46034900 |
| C  | 0.85768000  | 2.27353500  | -3.23998300 |
| C  | -0.07568500 | 1.98280700  | -4.26012900 |
| C  | 2.18292100  | 2.51356700  | -3.58512300 |
| C  | 0.35954100  | 1.93603700  | -5.59065900 |
| C  | 2.61717300  | 2.46713100  | -4.91030400 |
| H  | 2.88804000  | 2.74711400  | -2.78555400 |
| C  | 1.69336900  | 2.17508100  | -5.90989200 |
| H  | -0.36127500 | 1.71767100  | -6.38021200 |
| H  | 3.66110300  | 2.65742100  | -5.15481900 |
| H  | 2.00814900  | 2.13015900  | -6.95206000 |
| C  | 0.39130600  | 2.29090800  | -1.80948000 |
| H  | -0.38117900 | 3.08347200  | -1.69423300 |
| H  | 1.23180700  | 2.59548300  | -1.16055500 |
| H  | -0.27430900 | -0.76392600 | -1.84586900 |
| N  | -1.41568300 | 1.82503800  | -3.92219500 |
| H  | -1.97710600 | 1.34421000  | -4.61193000 |
| H  | -1.54644100 | 1.46037800  | -2.98170700 |

### TS-A2

|   |             |             |             |
|---|-------------|-------------|-------------|
| N | -0.55316900 | -1.64518700 | -1.28757200 |
| C | 1.83411700  | -2.08530600 | -1.54583400 |
| H | 1.89015600  | -1.67685200 | -2.56068800 |
| H | 2.63146700  | -2.82787800 | -1.42008400 |
| C | -2.88628700 | -0.98073800 | -1.33731400 |
| C | 0.27619200  | 1.28279800  | 1.16789400  |
| O | 0.54234600  | 2.14041200  | 1.92192300  |
| P | -2.40393600 | 0.22452400  | -0.02193800 |
| P | 2.03197000  | -0.64090400 | -0.41409500 |
| C | 2.99079600  | -1.28724200 | 1.00693400  |
| C | 3.69986400  | -0.39189700 | 1.81811900  |
| C | 2.94252600  | -2.63535900 | 1.37866200  |
| C | 4.35568600  | -0.83718700 | 2.96056700  |
| H | 3.74510700  | 0.66323300  | 1.54609400  |
| C | 3.59953600  | -3.08103100 | 2.52221000  |
| H | 2.38045000  | -3.35073300 | 0.77815500  |

|   |             |             |             |
|---|-------------|-------------|-------------|
| C | 4.30909600  | -2.18385300 | 3.31501800  |
| H | 4.90761900  | -0.12859600 | 3.57563400  |
| H | 3.55316700  | -4.13401800 | 2.79467400  |
| H | 4.82236400  | -2.53237600 | 4.20935800  |
| C | 3.20271600  | 0.49188700  | -1.21749100 |
| C | 4.14396200  | 0.02475800  | -2.14157300 |
| C | 3.18538100  | 1.85049800  | -0.88800000 |
| C | 5.03721300  | 0.90845700  | -2.73951700 |
| H | 4.18003000  | -1.03343200 | -2.39993400 |
| C | 4.08536000  | 2.73072100  | -1.48008600 |
| H | 2.44153100  | 2.23086000  | -0.18810500 |
| C | 5.00662200  | 2.26250400  | -2.41215000 |
| H | 5.76047200  | 0.53641500  | -3.46374700 |
| H | 4.03323700  | 3.79087800  | -1.24111000 |
| H | 5.69665900  | 2.95555500  | -2.89060800 |
| C | -3.39951700 | -0.20274300 | 1.44999400  |
| C | -4.68906000 | -0.73971900 | 1.36095700  |
| C | -2.86776300 | 0.07904200  | 2.71387600  |
| C | -5.42202800 | -1.00894200 | 2.51225400  |
| H | -5.13524300 | -0.94258100 | 0.38756400  |
| C | -3.60565800 | -0.18125600 | 3.86436500  |
| H | -1.86614400 | 0.50179700  | 2.79195700  |
| C | -4.88060200 | -0.73165500 | 3.76562200  |
| H | -6.42119300 | -1.43306200 | 2.42987900  |
| H | -3.17797300 | 0.03959200  | 4.84021100  |
| H | -5.45468900 | -0.94401000 | 4.66563300  |
| C | -3.12787200 | 1.80480100  | -0.57845100 |
| C | -2.54669900 | 2.99829600  | -0.13589400 |
| C | -4.23192100 | 1.86085000  | -1.43669600 |
| C | -3.05267500 | 4.22513800  | -0.55299300 |
| H | -1.68258400 | 2.96252900  | 0.52845600  |
| C | -4.73589300 | 3.08915000  | -1.85367400 |
| H | -4.70075600 | 0.94214900  | -1.78940200 |
| C | -4.14466500 | 4.27191900  | -1.41575700 |
| H | -2.58047800 | 5.14587300  | -0.21557100 |
| H | -5.58949800 | 3.12200000  | -2.52829700 |
| H | -4.53271700 | 5.23133400  | -1.75231700 |
| H | -3.92861300 | -1.31600300 | -1.27971300 |
| H | -2.76236400 | -0.45739200 | -2.29638000 |
| C | 0.46343600  | -2.70365700 | -1.31546700 |
| H | 0.42321600  | -3.24704900 | -0.35869100 |
| H | 0.23442500  | -3.43377800 | -2.11049200 |
| C | -1.92440600 | -2.15367900 | -1.26783600 |
| H | -2.09697300 | -2.84832800 | -2.10699600 |

|    |             |             |             |
|----|-------------|-------------|-------------|
| H  | -2.07472900 | -2.72514100 | -0.33805300 |
| Mn | -0.12317700 | -0.05294500 | 0.08197300  |
| C  | -0.20618700 | -1.15545000 | 1.41959900  |
| O  | -0.26237000 | -1.94112600 | 2.28808000  |
| O  | 0.53925000  | 0.29817000  | -2.59297000 |
| C  | 0.71739200  | 2.74368700  | -2.68736700 |
| C  | 1.47458200  | 2.78869900  | -3.88031600 |
| C  | 0.70496700  | 3.86318700  | -1.85869200 |
| C  | 2.18876000  | 3.95884100  | -4.18456000 |
| C  | 1.40753200  | 5.02682400  | -2.16644800 |
| H  | 0.14200100  | 3.80321900  | -0.92304400 |
| C  | 2.15394500  | 5.06347300  | -3.34322700 |
| H  | 2.78056200  | 3.98694100  | -5.10113700 |
| H  | 1.37964700  | 5.88440300  | -1.49652300 |
| H  | 2.72118100  | 5.95599300  | -3.60663600 |
| C  | -0.06808000 | 1.49818800  | -2.31617100 |
| H  | -1.08784800 | 1.58031900  | -2.78061400 |
| H  | -0.28920900 | 1.64423600  | -1.21253700 |
| H  | -0.35868500 | -0.98704000 | -2.10054300 |
| N  | 1.46094500  | 1.70693100  | -4.74754200 |
| H  | 2.28481400  | 1.64161100  | -5.33143000 |
| H  | 1.24778100  | 0.84310600  | -4.23835900 |

**IM-A3**

|   |             |             |             |
|---|-------------|-------------|-------------|
| N | -0.40692100 | -1.08122600 | -1.18925900 |
| C | 1.98865600  | -0.96687600 | -1.60459100 |
| H | 1.86745600  | -0.19406300 | -2.37902500 |
| H | 2.90484400  | -1.52684400 | -1.82898400 |
| C | -2.82142100 | -0.93602100 | -1.00983800 |
| C | 0.02494400  | 1.55553100  | 1.58948800  |
| O | 0.12211400  | 2.45316700  | 2.33752400  |
| P | -2.44960700 | 0.33973500  | 0.28463600  |
| P | 2.06071000  | -0.13675400 | 0.04560200  |
| C | 3.07556900  | -1.31430500 | 1.02636200  |
| C | 4.41811000  | -1.06191400 | 1.33833000  |
| C | 2.51393400  | -2.53426100 | 1.42732600  |
| C | 5.17280300  | -2.00349100 | 2.03224400  |
| H | 4.88014100  | -0.12328300 | 1.03820600  |
| C | 3.27215300  | -3.47634500 | 2.11431000  |
| H | 1.46841000  | -2.74648900 | 1.21724100  |
| C | 4.60419900  | -3.21235000 | 2.42184200  |
| H | 6.21314800  | -1.78708700 | 2.26936800  |
| H | 2.81409200  | -4.41506900 | 2.42083300  |
| H | 5.19534400  | -3.94531700 | 2.96825300  |
| C | 3.18665300  | 1.27671800  | -0.14624200 |

|    |             |             |             |
|----|-------------|-------------|-------------|
| C  | 3.95840200  | 1.48193700  | -1.29419600 |
| C  | 3.34020500  | 2.14252500  | 0.94558900  |
| C  | 4.87979900  | 2.52392800  | -1.33888400 |
| H  | 3.84429000  | 0.83416700  | -2.16248200 |
| C  | 4.26462700  | 3.17974600  | 0.89683700  |
| H  | 2.74013100  | 1.99557300  | 1.84316000  |
| C  | 5.04033800  | 3.36843000  | -0.24458400 |
| H  | 5.46439400  | 2.68281800  | -2.24336400 |
| H  | 4.37637900  | 3.84345900  | 1.75238100  |
| H  | 5.76112600  | 4.18354600  | -0.28695300 |
| C  | -3.40721200 | -0.17246700 | 1.75972700  |
| C  | -4.69878900 | -0.70133400 | 1.63727300  |
| C  | -2.89485000 | 0.06107600  | 3.04024900  |
| C  | -5.44526400 | -1.01987900 | 2.76617500  |
| H  | -5.13896900 | -0.84227400 | 0.65027200  |
| C  | -3.64571000 | -0.24904300 | 4.17094200  |
| H  | -1.90282100 | 0.49487100  | 3.15424500  |
| C  | -4.91744300 | -0.79773200 | 4.03663700  |
| H  | -6.44530000 | -1.43526000 | 2.65375000  |
| H  | -3.23001200 | -0.06439500 | 5.15960000  |
| H  | -5.50160100 | -1.04685900 | 4.92071400  |
| C  | -3.41548800 | 1.80650800  | -0.25409900 |
| C  | -4.12290200 | 2.56614300  | 0.68822400  |
| C  | -3.41897200 | 2.21544300  | -1.59580400 |
| C  | -4.83987500 | 3.69166600  | 0.29497100  |
| H  | -4.12642500 | 2.27155500  | 1.73659600  |
| C  | -4.14437000 | 3.33954800  | -1.98150000 |
| H  | -2.82324700 | 1.67563600  | -2.33575100 |
| C  | -4.85977000 | 4.07730600  | -1.04256000 |
| H  | -5.38929300 | 4.26524100  | 1.03964700  |
| H  | -4.14042300 | 3.64278800  | -3.02711400 |
| H  | -5.42565600 | 4.95514800  | -1.35002600 |
| H  | -3.75373300 | -1.47541500 | -0.80971700 |
| H  | -2.93594300 | -0.40330500 | -1.96104600 |
| C  | 0.76848100  | -1.86934200 | -1.59945300 |
| H  | 0.89127700  | -2.70979100 | -0.90154800 |
| H  | 0.60141400  | -2.30237800 | -2.59958700 |
| C  | -1.63983700 | -1.88307900 | -1.10829200 |
| H  | -1.73812700 | -2.52807900 | -1.99727900 |
| H  | -1.57411500 | -2.53900500 | -0.22879200 |
| Mn | -0.15265400 | 0.21550800  | 0.45344000  |
| C  | -0.28288500 | -0.97827200 | 1.72646400  |
| O  | -0.37945800 | -1.78366900 | 2.57598300  |
| O  | -0.81292400 | 1.00377500  | -2.80347800 |

|   |             |             |             |
|---|-------------|-------------|-------------|
| C | 0.95283600  | 2.67071300  | -2.45397200 |
| C | 1.66591200  | 2.36315200  | -3.63354200 |
| C | 1.32543100  | 3.79738000  | -1.71689900 |
| C | 2.68035300  | 3.23854100  | -4.05817100 |
| C | 2.34364700  | 4.64595500  | -2.12803600 |
| H | 0.77595100  | 4.01062300  | -0.79603700 |
| C | 3.00894100  | 4.36674500  | -3.32256900 |
| H | 3.21401500  | 3.00974900  | -4.98236700 |
| H | 2.61229300  | 5.51618000  | -1.53256800 |
| H | 3.79931100  | 5.02773200  | -3.67799800 |
| C | -0.26431000 | 1.89481900  | -1.99381500 |
| H | -0.98315700 | 2.62767500  | -1.55763200 |
| H | 0.10532900  | 1.38518700  | -0.95022000 |
| H | -0.57155600 | -0.36216700 | -1.95067600 |
| N | 1.41107400  | 1.18772100  | -4.33525500 |
| H | 1.62958800  | 1.24888700  | -5.32225800 |
| H | 0.46019200  | 0.85860300  | -4.14404100 |

**TS-A3**

|   |             |             |             |
|---|-------------|-------------|-------------|
| N | -0.42075300 | -1.11787400 | -1.24988500 |
| C | 1.98385300  | -1.03121100 | -1.59339100 |
| H | 1.88758200  | -0.28181600 | -2.39382500 |
| H | 2.90035300  | -1.60543600 | -1.77683000 |
| C | -2.83419200 | -0.92544900 | -1.07992600 |
| C | -0.03724100 | 1.44351300  | 1.62702500  |
| O | 0.02382900  | 2.33115300  | 2.39422200  |
| P | -2.42759000 | 0.29383800  | 0.25953800  |
| P | 2.02084900  | -0.13291400 | 0.02952400  |
| C | 3.10008700  | -1.22458600 | 1.05063900  |
| C | 4.39443100  | -0.85651900 | 1.44132000  |
| C | 2.62314600  | -2.48443300 | 1.43831500  |
| C | 5.18268400  | -1.72130600 | 2.19612900  |
| H | 4.79693900  | 0.11399500  | 1.15860400  |
| C | 3.41610100  | -3.35177400 | 2.18244400  |
| H | 1.61105700  | -2.78582200 | 1.17864500  |
| C | 4.69917500  | -2.97129400 | 2.56746500  |
| H | 6.18311600  | -1.41132100 | 2.49439700  |
| H | 3.02102800  | -4.32325900 | 2.47475400  |
| H | 5.31591500  | -3.64459300 | 3.16039400  |
| C | 3.12768600  | 1.28851600  | -0.24349300 |
| C | 3.99890900  | 1.35057100  | -1.33540900 |
| C | 3.20438700  | 2.27994500  | 0.74443400  |
| C | 4.93937600  | 2.37160500  | -1.42910800 |
| H | 3.95154100  | 0.59775400  | -2.12157800 |
| C | 4.15188500  | 3.29434100  | 0.65196800  |

|    |             |             |             |
|----|-------------|-------------|-------------|
| H  | 2.52604600  | 2.24823100  | 1.59655200  |
| C  | 5.02436900  | 3.33940000  | -0.43313200 |
| H  | 5.60262800  | 2.41383500  | -2.29193300 |
| H  | 4.20554500  | 4.05433800  | 1.42976800  |
| H  | 5.76424900  | 4.13509500  | -0.50746800 |
| C  | -3.45656000 | -0.22777500 | 1.68712400  |
| C  | -4.78586700 | -0.63440200 | 1.51050500  |
| C  | -2.94674600 | -0.14373900 | 2.98622300  |
| C  | -5.57398800 | -0.97917900 | 2.60263400  |
| H  | -5.21872400 | -0.66422700 | 0.50989000  |
| C  | -3.73898400 | -0.47971400 | 4.08138900  |
| H  | -1.92261000 | 0.19177900  | 3.14110800  |
| C  | -5.04967700 | -0.90549800 | 3.89181000  |
| H  | -6.60320700 | -1.29926600 | 2.44761100  |
| H  | -3.32500000 | -0.41040700 | 5.08557700  |
| H  | -5.66638500 | -1.17499700 | 4.74743600  |
| C  | -3.31866700 | 1.82988500  | -0.21071600 |
| C  | -3.73533600 | 2.69469400  | 0.81153400  |
| C  | -3.53094000 | 2.21126200  | -1.54113100 |
| C  | -4.36681400 | 3.89637800  | 0.51201600  |
| H  | -3.57148700 | 2.41910500  | 1.85366000  |
| C  | -4.17247200 | 3.41185800  | -1.83672400 |
| H  | -3.15141800 | 1.59616900  | -2.35591600 |
| C  | -4.59615700 | 4.25503000  | -0.81435500 |
| H  | -4.68527900 | 4.55256500  | 1.32031200  |
| H  | -4.33284200 | 3.69032000  | -2.87721100 |
| H  | -5.09693100 | 5.19290900  | -1.04914000 |
| H  | -3.77645500 | -1.45269200 | -0.89380300 |
| H  | -2.93711000 | -0.37236500 | -2.02051600 |
| C  | 0.75893700  | -1.92660100 | -1.59533700 |
| H  | 0.84793500  | -2.73350800 | -0.85448900 |
| H  | 0.62300200  | -2.40396600 | -2.58055700 |
| C  | -1.67132100 | -1.89494400 | -1.20106100 |
| H  | -1.77757900 | -2.51671400 | -2.10593400 |
| H  | -1.61891600 | -2.57086400 | -0.33641700 |
| Mn | -0.17635400 | 0.14847200  | 0.44530800  |
| C  | -0.30688000 | -1.14566900 | 1.63866400  |
| O  | -0.40524700 | -2.01167800 | 2.42805300  |
| O  | -0.91336700 | 1.05172700  | -2.91625600 |
| C  | 0.86552600  | 2.65289500  | -2.56790200 |
| C  | 1.62836600  | 2.29884800  | -3.70661000 |
| C  | 1.23624900  | 3.78056500  | -1.82458700 |
| C  | 2.69204100  | 3.13337100  | -4.09009300 |
| C  | 2.30349200  | 4.58134300  | -2.19372800 |

|              |             |             |             |
|--------------|-------------|-------------|-------------|
| H            | 0.64932400  | 4.01769400  | -0.93435000 |
| C            | 3.01922100  | 4.25715800  | -3.34954700 |
| H            | 3.26764700  | 2.87372600  | -4.97957200 |
| H            | 2.57893800  | 5.44743600  | -1.59613500 |
| H            | 3.85470200  | 4.88119900  | -3.66600000 |
| C            | -0.39498300 | 1.96765900  | -2.20433000 |
| H            | -1.07273700 | 2.62283000  | -1.62035400 |
| H            | 0.03579100  | 1.33282400  | -0.77922800 |
| H            | -0.54218700 | -0.41399500 | -2.00088200 |
| N            | 1.36441100  | 1.13295000  | -4.40837100 |
| H            | 1.65495400  | 1.15237500  | -5.37745000 |
| H            | 0.40897700  | 0.80677800  | -4.26436700 |
| <b>1b</b>    |             |             |             |
| O            | 2.47711300  | 0.92633400  | 0.05348800  |
| C            | 0.25266500  | 0.04141500  | 0.05080300  |
| C            | -0.44605200 | 1.28007300  | -0.05275200 |
| C            | -0.47517500 | -1.15706800 | 0.13867000  |
| C            | -1.85551800 | 1.24972600  | -0.04312700 |
| C            | -1.85593500 | -1.17240900 | 0.13661900  |
| H            | 0.08980200  | -2.08767300 | 0.21545800  |
| C            | -2.53666900 | 0.05028300  | 0.04838700  |
| H            | -2.40353100 | 2.18877700  | -0.11675800 |
| H            | -2.40553800 | -2.10764600 | 0.20564300  |
| H            | -3.62581100 | 0.06246500  | 0.05098700  |
| C            | 1.69880600  | -0.02326600 | 0.09628700  |
| H            | 2.10071800  | -1.06232200 | 0.18875700  |
| N            | 0.23284800  | 2.44764800  | -0.18307500 |
| H            | -0.25649100 | 3.32232400  | -0.08389600 |
| H            | 1.24059500  | 2.42085500  | -0.07129300 |
| <b>IM-A4</b> |             |             |             |
| N            | -0.13210700 | -1.11984700 | -1.25139100 |
| C            | 2.29160900  | -1.36067100 | -1.12353800 |
| H            | 2.52215300  | -0.73500200 | -1.99697400 |
| H            | 3.11899400  | -2.07127200 | -1.00573900 |
| C            | -2.51726500 | -0.64104500 | -1.38628400 |
| C            | 0.01691600  | 1.22852300  | 1.87467200  |
| O            | 0.06105300  | 2.06162000  | 2.70037500  |
| P            | -2.20975300 | 0.34807600  | 0.16370200  |
| P            | 2.12431000  | -0.22161500 | 0.35052600  |
| C            | 3.08696900  | -1.09250200 | 1.64481100  |
| C            | 3.94283700  | -0.40218500 | 2.51041900  |
| C            | 2.89695500  | -2.46571400 | 1.84380500  |
| C            | 4.60668700  | -1.07296300 | 3.53415100  |
| H            | 4.09653300  | 0.66847000  | 2.37950300  |

|   |             |             |             |
|---|-------------|-------------|-------------|
| C | 3.56607800  | -3.13716300 | 2.86107400  |
| H | 2.20615200  | -3.01786000 | 1.20501600  |
| C | 4.42569400  | -2.44194700 | 3.70868300  |
| H | 5.27011800  | -0.52014500 | 4.19736200  |
| H | 3.40920700  | -4.20593000 | 2.99697400  |
| H | 4.94675200  | -2.96573500 | 4.50806000  |
| C | 3.25834000  | 1.15210500  | -0.07399300 |
| C | 4.57611700  | 0.89832900  | -0.47917200 |
| C | 2.81911900  | 2.47524100  | 0.01511900  |
| C | 5.42954500  | 1.94615700  | -0.80601100 |
| H | 4.93953800  | -0.12932600 | -0.52735000 |
| C | 3.67908700  | 3.52562900  | -0.29983600 |
| H | 1.79323600  | 2.66960600  | 0.32547100  |
| C | 4.98078200  | 3.26329500  | -0.71551800 |
| H | 6.44900000  | 1.73642800  | -1.12617900 |
| H | 3.32746300  | 4.55309800  | -0.22206100 |
| H | 5.64994800  | 4.08486000  | -0.96663400 |
| C | -3.44497900 | -0.30784500 | 1.34490700  |
| C | -3.93394100 | 0.51530000  | 2.36726400  |
| C | -3.82626500 | -1.65378800 | 1.32787100  |
| C | -4.79830800 | 0.00865100  | 3.33192500  |
| H | -3.63804800 | 1.56416800  | 2.40267300  |
| C | -4.69371800 | -2.16019000 | 2.29091000  |
| H | -3.43922400 | -2.32237400 | 0.55780900  |
| C | -5.18422300 | -1.32926100 | 3.29425200  |
| H | -5.17280000 | 0.66366300  | 4.11694900  |
| H | -4.98345500 | -3.20910100 | 2.25900200  |
| H | -5.86215500 | -1.72471700 | 4.04856100  |
| C | -2.94199600 | 1.97890600  | -0.23451200 |
| C | -2.14935900 | 3.12925700  | -0.21118400 |
| C | -4.30098500 | 2.09302300  | -0.55948700 |
| C | -2.70372700 | 4.37137300  | -0.51386700 |
| H | -1.09417900 | 3.03578500  | 0.04322800  |
| C | -4.85056600 | 3.33134900  | -0.87077300 |
| H | -4.93333800 | 1.20406700  | -0.55278500 |
| C | -4.05086100 | 4.47367400  | -0.84689800 |
| H | -2.07922000 | 5.26267600  | -0.48657900 |
| H | -5.90616800 | 3.40803400  | -1.12695100 |
| H | -4.48286400 | 5.44497900  | -1.08332000 |
| H | -3.52834600 | -1.06600800 | -1.42575800 |
| H | -2.42724200 | 0.05407400  | -2.23271600 |
| C | 0.97469000  | -2.08500900 | -1.33114400 |
| H | 0.80230800  | -2.82452700 | -0.53686900 |
| H | 0.96209800  | -2.62507200 | -2.29379400 |

|              |             |             |             |
|--------------|-------------|-------------|-------------|
| C            | -1.45485900 | -1.72153500 | -1.48483800 |
| H            | -1.49045700 | -2.23307400 | -2.46206200 |
| H            | -1.59334800 | -2.48639000 | -0.70729500 |
| Mn           | -0.06047300 | 0.05277700  | 0.57049200  |
| C            | -0.30960300 | -1.36306700 | 1.62251900  |
| O            | -0.48730200 | -2.30742000 | 2.29801800  |
| H            | 0.15182800  | 1.29203000  | -0.47416900 |
| H            | 0.01796900  | -0.39785300 | -1.95590700 |
| <b>TS-A4</b> |             |             |             |
| N            | -0.14860400 | -1.07708600 | -1.26123300 |
| C            | 2.26447700  | -1.33368700 | -1.18916100 |
| H            | 2.44763100  | -0.69137500 | -2.06062500 |
| H            | 3.10341900  | -2.03735600 | -1.11359300 |
| C            | -2.50878000 | -0.56908500 | -1.48070700 |
| C            | 0.06679300  | 1.57306000  | 1.56421400  |
| O            | 0.12619900  | 2.47039900  | 2.31661700  |
| P            | -2.25482000 | 0.39073700  | 0.07426200  |
| P            | 2.15178500  | -0.20242300 | 0.27206400  |
| C            | 2.95331900  | -1.09679900 | 1.64416700  |
| C            | 3.50319000  | -0.37342800 | 2.71029900  |
| C            | 2.94150400  | -2.49367900 | 1.70934200  |
| C            | 4.04705800  | -1.03515500 | 3.80548400  |
| H            | 3.50912500  | 0.71672400  | 2.67683700  |
| C            | 3.48708500  | -3.15440400 | 2.80622400  |
| H            | 2.49326200  | -3.07349300 | 0.90192700  |
| C            | 4.04358600  | -2.42747300 | 3.85454600  |
| H            | 4.47634600  | -0.46046900 | 4.62443600  |
| H            | 3.47338900  | -4.24237400 | 2.84176300  |
| H            | 4.47062500  | -2.94485400 | 4.71188400  |
| C            | 3.37222600  | 1.10670200  | -0.09753000 |
| C            | 4.73017500  | 0.79023300  | -0.24308100 |
| C            | 2.96125900  | 2.43176500  | -0.26335300 |
| C            | 5.65443100  | 1.77895500  | -0.55839500 |
| H            | 5.06351500  | -0.23822100 | -0.09870200 |
| C            | 3.88996000  | 3.42339000  | -0.57427000 |
| H            | 1.90667000  | 2.68027100  | -0.14500300 |
| C            | 5.23463500  | 3.09803100  | -0.72404000 |
| H            | 6.70650700  | 1.52210000  | -0.67133500 |
| H            | 3.56001000  | 4.45376700  | -0.69522000 |
| H            | 5.95986000  | 3.87364400  | -0.96490100 |
| C            | -3.34098800 | -0.37579800 | 1.32138800  |
| C            | -3.53114400 | 0.29197700  | 2.53920000  |
| C            | -3.88884500 | -1.65130200 | 1.15799400  |
| C            | -4.26601100 | -0.29818800 | 3.56011900  |

|                      |             |             |             |
|----------------------|-------------|-------------|-------------|
| H                    | -3.09473800 | 1.28102700  | 2.68702300  |
| C                    | -4.62107500 | -2.24332000 | 2.18454300  |
| H                    | -3.73700000 | -2.19894800 | 0.22823600  |
| C                    | -4.81307800 | -1.56859600 | 3.38534300  |
| H                    | -4.40690700 | 0.23255400  | 4.50017000  |
| H                    | -5.03988800 | -3.23821200 | 2.04297700  |
| H                    | -5.38164200 | -2.03373100 | 4.18857400  |
| C                    | -3.06853400 | 1.99465700  | -0.24497800 |
| C                    | -2.28765600 | 3.12218900  | -0.51939600 |
| C                    | -4.46465200 | 2.11293400  | -0.25211800 |
| C                    | -2.89150000 | 4.34348100  | -0.80701500 |
| H                    | -1.20104400 | 3.03458600  | -0.50012800 |
| C                    | -5.06554900 | 3.33398600  | -0.53725000 |
| H                    | -5.07990800 | 1.24271700  | -0.02091500 |
| C                    | -4.27917300 | 4.45064400  | -0.81649400 |
| H                    | -2.27510800 | 5.21600700  | -1.01604400 |
| H                    | -6.15119000 | 3.41638400  | -0.53886800 |
| H                    | -4.75103500 | 5.40751000  | -1.03405500 |
| H                    | -3.52833700 | -0.96197600 | -1.58523800 |
| H                    | -2.34252400 | 0.13882300  | -2.30390800 |
| C                    | 0.92330200  | -2.03541600 | -1.33841100 |
| H                    | 0.81859800  | -2.81401400 | -0.54910400 |
| H                    | 0.89475700  | -2.57740800 | -2.30375600 |
| C                    | -1.44412400 | -1.65604000 | -1.51371500 |
| H                    | -1.46037300 | -2.16560900 | -2.49665800 |
| H                    | -1.68661400 | -2.43861400 | -0.75938700 |
| Mn                   | -0.04435400 | 0.23240400  | 0.41391300  |
| C                    | -0.27027100 | -0.98496000 | 1.67654900  |
| O                    | -0.42727600 | -1.82696000 | 2.47195900  |
| H                    | 0.17106400  | 1.23904500  | -1.05267900 |
| H                    | 0.07216400  | 0.35572500  | -1.39146900 |
| <b>H<sub>2</sub></b> |             |             |             |
| H                    | -3.30014700 | 0.35849100  | 0.00000000  |
| H                    | -4.04324900 | 0.35849100  | 0.00000000  |
| <b>IM-A5</b>         |             |             |             |
| N                    | 0.16793600  | -0.32942600 | 2.43486000  |
| C                    | -2.26878900 | -0.22379900 | 2.48660500  |
| H                    | -2.31384100 | 0.73486900  | 3.01972400  |
| H                    | -3.19178900 | -0.77472500 | 2.70623100  |
| C                    | 2.59977300  | -0.25141200 | 2.27990900  |
| C                    | -0.00993200 | 0.37816400  | -1.42363400 |
| O                    | -0.08596900 | 0.71292700  | -2.54588900 |
| P                    | 2.29186000  | 0.06879100  | 0.46608200  |
| P                    | -2.08961900 | 0.15872900  | 0.67005900  |

|   |             |             |             |
|---|-------------|-------------|-------------|
| C | -3.25820400 | -1.00093700 | -0.12789400 |
| C | -4.02353700 | -0.61656500 | -1.23447400 |
| C | -3.31568500 | -2.33210100 | 0.30264500  |
| C | -4.84012100 | -1.53910400 | -1.88222200 |
| H | -3.98314600 | 0.41376300  | -1.58773100 |
| C | -4.13747300 | -3.25086000 | -0.33998900 |
| H | -2.70008500 | -2.66055800 | 1.14104000  |
| C | -4.90360500 | -2.85571200 | -1.43426500 |
| H | -5.43101100 | -1.22578800 | -2.74121700 |
| H | -4.17329500 | -4.28102400 | 0.01018500  |
| H | -5.54436900 | -3.57549900 | -1.94065200 |
| C | -2.96743000 | 1.75440600  | 0.46604700  |
| C | -4.24293600 | 1.95160300  | 1.01425400  |
| C | -2.38838300 | 2.77608600  | -0.29260300 |
| C | -4.92063300 | 3.14906600  | 0.81188700  |
| H | -4.71489900 | 1.15378700  | 1.58922200  |
| C | -3.07737000 | 3.96674900  | -0.51537600 |
| H | -1.38902900 | 2.63353600  | -0.70377500 |
| C | -4.33994600 | 4.15663000  | 0.03979500  |
| H | -5.90931500 | 3.29306300  | 1.24507000  |
| H | -2.61433600 | 4.75265400  | -1.10882800 |
| H | -4.87729500 | 5.08904200  | -0.13229500 |
| C | 3.37903100  | -1.15370300 | -0.35977500 |
| C | 4.16648100  | -0.80852800 | -1.46357200 |
| C | 3.36170200  | -2.48873900 | 0.06329400  |
| C | 4.92776300  | -1.77309900 | -2.11818100 |
| H | 4.18965100  | 0.22390900  | -1.81068400 |
| C | 4.12999400  | -3.44940500 | -0.58425200 |
| H | 2.73070300  | -2.78476600 | 0.90217300  |
| C | 4.91597100  | -3.09334900 | -1.67812300 |
| H | 5.53497200  | -1.48849200 | -2.97584100 |
| H | 4.10778900  | -4.48157700 | -0.23896100 |
| H | 5.51283300  | -3.84639900 | -2.18978600 |
| C | 3.19654600  | 1.62599900  | 0.14326600  |
| C | 2.66771500  | 2.56419500  | -0.74813000 |
| C | 4.44766500  | 1.87002000  | 0.72485200  |
| C | 3.38338400  | 3.71705100  | -1.06420800 |
| H | 1.68602000  | 2.39125900  | -1.18702900 |
| C | 5.14854200  | 3.03527700  | 0.43107400  |
| H | 4.88380500  | 1.13564900  | 1.40324700  |
| C | 4.61946800  | 3.95766000  | -0.47112900 |
| H | 2.96188400  | 4.43565700  | -1.76467600 |
| H | 6.11538600  | 3.21901200  | 0.89699900  |
| H | 5.17331400  | 4.86427400  | -0.71039900 |

|              |             |             |             |
|--------------|-------------|-------------|-------------|
| H            | 3.53366100  | -0.80098000 | 2.45273200  |
| H            | 2.69920500  | 0.72514100  | 2.77517800  |
| C            | -1.04333800 | -1.00077200 | 2.93694900  |
| H            | -1.04154900 | -2.02046900 | 2.52571500  |
| H            | -1.01481500 | -1.08799700 | 4.03638200  |
| C            | 1.40885000  | -1.00106000 | 2.84870500  |
| H            | 1.47191800  | -1.06884000 | 3.94824200  |
| H            | 1.36487100  | -2.02883400 | 2.46104600  |
| Mn           | 0.08540500  | -0.04536100 | 0.27894400  |
| C            | 0.01549600  | -1.79854800 | -0.00750300 |
| O            | -0.02689000 | -2.95879100 | -0.18617800 |
| H            | 0.21294000  | 1.56976700  | 0.54977500  |
| H            | 0.16803200  | 0.61893300  | 2.82955100  |
| O            | -0.43854200 | 2.49870000  | 2.80568200  |
| C            | 0.22131700  | 4.73170600  | 2.06107400  |
| C            | -1.05794500 | 5.30952000  | 1.90314100  |
| C            | 1.28844900  | 5.21472900  | 1.30848700  |
| C            | -1.21019300 | 6.37350900  | 1.00312500  |
| C            | 1.13135600  | 6.26891900  | 0.41240900  |
| H            | 2.26591400  | 4.74566000  | 1.43419200  |
| C            | -0.12790700 | 6.84792800  | 0.27109600  |
| H            | -2.19662700 | 6.82316400  | 0.88002400  |
| H            | 1.98016700  | 6.63318400  | -0.16338600 |
| H            | -0.27566300 | 7.67323700  | -0.42449800 |
| C            | 0.41936200  | 3.62152800  | 3.04444900  |
| H            | 0.17242500  | 3.94668900  | 4.06486500  |
| H            | 1.47733100  | 3.30729600  | 3.04130600  |
| H            | -0.29685800 | 2.23812100  | 1.85617900  |
| N            | -2.11870700 | 4.85544600  | 2.67799900  |
| H            | -3.02674300 | 5.09259900  | 2.29665700  |
| H            | -2.06088000 | 3.85941500  | 2.86931100  |
| <b>TS-A5</b> |             |             |             |
| N            | -0.07790000 | 0.14565100  | 2.46649100  |
| C            | -2.52029700 | -0.04519000 | 2.43252300  |
| H            | -2.67909500 | 0.97574300  | 2.80013200  |
| H            | -3.38481700 | -0.65105000 | 2.72790100  |
| C            | 2.37974200  | 0.29490300  | 2.48990000  |
| C            | -0.03065200 | 0.45006800  | -1.40846400 |
| O            | 0.02635800  | 0.53187200  | -2.57585800 |
| P            | 2.16420700  | 0.47109800  | 0.66830500  |
| P            | -2.32812400 | 0.07053700  | 0.60186000  |
| C            | -3.13466000 | -1.40781300 | -0.10765500 |
| C            | -2.60290800 | -1.98788900 | -1.26425300 |
| C            | -4.31036600 | -1.94109900 | 0.43611800  |

|   |             |             |             |
|---|-------------|-------------|-------------|
| C | -3.22175500 | -3.08453700 | -1.85661800 |
| H | -1.69469600 | -1.57712100 | -1.70275000 |
| C | -4.92360400 | -3.04320500 | -0.15054700 |
| H | -4.76120000 | -1.48310200 | 1.31652800  |
| C | -4.37876800 | -3.61793100 | -1.29708900 |
| H | -2.79316800 | -3.52520800 | -2.75472300 |
| H | -5.83334400 | -3.45171400 | 0.28625200  |
| H | -4.85989600 | -4.48045000 | -1.75514100 |
| C | -3.44792600 | 1.43269500  | 0.11507700  |
| C | -4.39824500 | 1.28922500  | -0.90179100 |
| C | -3.30366400 | 2.67403400  | 0.75250000  |
| C | -5.20287800 | 2.36603800  | -1.26653800 |
| H | -4.51720200 | 0.33200700  | -1.40802800 |
| C | -4.11536800 | 3.74192200  | 0.38533600  |
| H | -2.55380400 | 2.79689000  | 1.54082800  |
| C | -5.06591800 | 3.59223100  | -0.62300600 |
| H | -5.94181700 | 2.24164700  | -2.05640600 |
| H | -4.00219100 | 4.69984200  | 0.89086300  |
| H | -5.69725600 | 4.43215000  | -0.90835200 |
| C | 3.22188200  | -0.80614100 | -0.09180300 |
| C | 3.74372200  | -0.61223600 | -1.37638000 |
| C | 3.44257400  | -2.02775100 | 0.55337700  |
| C | 4.48194000  | -1.61551000 | -1.99507100 |
| H | 3.57283500  | 0.33313700  | -1.89288800 |
| C | 4.18158100  | -3.02991700 | -0.06763500 |
| H | 3.02581700  | -2.20577100 | 1.54506000  |
| C | 4.70437200  | -2.82561900 | -1.34147100 |
| H | 4.88629700  | -1.45039800 | -2.99221700 |
| H | 4.34567400  | -3.97563000 | 0.44601800  |
| H | 5.28111700  | -3.61054000 | -1.82730000 |
| C | 3.04923200  | 2.01560400  | 0.25627300  |
| C | 2.49906400  | 2.94694100  | -0.62907800 |
| C | 4.29713300  | 2.27868400  | 0.83524100  |
| C | 3.18035600  | 4.12633900  | -0.92489100 |
| H | 1.53320300  | 2.74511800  | -1.09408200 |
| C | 4.97542800  | 3.45547200  | 0.54089200  |
| H | 4.73462600  | 1.56138000  | 1.52999700  |
| C | 4.41619700  | 4.38226300  | -0.33773600 |
| H | 2.74287800  | 4.84477300  | -1.61548000 |
| H | 5.94152500  | 3.65326400  | 1.00266800  |
| H | 4.94697400  | 5.30506400  | -0.56590000 |
| H | 3.30301200  | -0.23796200 | 2.75075500  |
| H | 2.46843500  | 1.31270400  | 2.88749100  |
| C | -1.22522400 | -0.59694600 | 3.00100600  |

|    |             |             |            |
|----|-------------|-------------|------------|
| H  | -1.12667200 | -1.67181600 | 2.76134000 |
| H  | -1.23535000 | -0.51379000 | 4.10220800 |
| C  | 1.15026000  | -0.38795000 | 3.06202500 |
| H  | 1.12236500  | -0.24673100 | 4.15583800 |
| H  | 1.19991400  | -1.47867200 | 2.88138300 |
| Mn | -0.06768100 | 0.26772900  | 0.35624500 |
| C  | 0.11137900  | -1.48083400 | 0.26469900 |
| O  | 0.23088900  | -2.64337400 | 0.25283000 |
| H  | 0.02172300  | 2.06652300  | 0.36381300 |
| H  | -0.33767600 | 1.36080300  | 2.76432000 |
| O  | -0.88451300 | 2.47019100  | 2.93605800 |
| C  | 1.27177000  | 3.33742700  | 3.72549200 |
| C  | 1.26196700  | 2.65171300  | 4.96367800 |
| C  | 2.47881000  | 3.85987000  | 3.26006200 |
| C  | 2.46237100  | 2.53152100  | 5.68223800 |
| C  | 3.66637200  | 3.74164500  | 3.97872300 |
| H  | 2.47986500  | 4.36788400  | 2.29245800 |
| C  | 3.64706700  | 3.07393700  | 5.20088500 |
| H  | 2.45285100  | 1.98979500  | 6.62916700 |
| H  | 4.59194200  | 4.15655000  | 3.58310800 |
| H  | 4.56171100  | 2.96308300  | 5.78232000 |
| C  | 0.00395200  | 3.53797700  | 2.92214900 |
| H  | 0.31464800  | 3.81338300  | 1.88506200 |
| H  | -0.51871900 | 4.43709000  | 3.30827400 |
| H  | -0.57027900 | 1.95245500  | 0.89721500 |
| N  | 0.10900300  | 2.03810700  | 5.44282200 |
| H  | -0.00712800 | 2.06076100  | 6.44607800 |
| H  | -0.72510100 | 2.25133600  | 4.90199300 |

**IM-A6**

|   |             |             |             |
|---|-------------|-------------|-------------|
| N | -0.17121400 | 0.01813700  | 2.50072800  |
| C | -2.59409600 | -0.12725800 | 2.28574500  |
| H | -2.78260300 | 0.86770600  | 2.71090500  |
| H | -3.48680400 | -0.73827500 | 2.47037400  |
| C | 2.24582100  | 0.32526500  | 2.59522000  |
| C | 0.05969100  | 0.49582300  | -1.38905300 |
| O | 0.13806100  | 0.77699100  | -2.52537700 |
| P | 2.11477000  | 0.44067700  | 0.74191100  |
| P | -2.25771400 | 0.10355700  | 0.46714200  |
| C | -3.18229800 | -1.25894300 | -0.32901700 |
| C | -3.73666000 | -1.07970400 | -1.60230900 |
| C | -3.25910000 | -2.52285400 | 0.26628000  |
| C | -4.36898500 | -2.13374300 | -2.25363600 |
| H | -3.67717800 | -0.10378600 | -2.08442400 |
| C | -3.89705200 | -3.57529600 | -0.38289700 |

|   |             |             |             |
|---|-------------|-------------|-------------|
| H | -2.80678600 | -2.69433000 | 1.24377800  |
| C | -4.45605500 | -3.38264400 | -1.64371100 |
| H | -4.79765100 | -1.97717200 | -3.24206600 |
| H | -3.95323600 | -4.55090300 | 0.09710000  |
| H | -4.95370100 | -4.20634800 | -2.15219200 |
| C | -3.30808900 | 1.54118100  | 0.03300500  |
| C | -4.67684900 | 1.54335700  | 0.33609700  |
| C | -2.75596800 | 2.64722700  | -0.61861500 |
| C | -5.47037000 | 2.63742800  | 0.01085600  |
| H | -5.12539900 | 0.67501500  | 0.82101600  |
| C | -3.55449700 | 3.73935600  | -0.95378100 |
| H | -1.69320300 | 2.64185100  | -0.85926300 |
| C | -4.90885100 | 3.73809000  | -0.63559100 |
| H | -6.53071300 | 2.63110600  | 0.25778800  |
| H | -3.11413200 | 4.59285900  | -1.46662100 |
| H | -5.53106100 | 4.59309600  | -0.89472400 |
| C | 3.30306400  | -0.81047600 | 0.13418800  |
| C | 3.86077800  | -0.65676500 | -1.14170600 |
| C | 3.59083200  | -1.97139700 | 0.85833100  |
| C | 4.70339600  | -1.62948200 | -1.66777200 |
| H | 3.63431600  | 0.23714100  | -1.72434000 |
| C | 4.43639500  | -2.94435900 | 0.33263800  |
| H | 3.14848300  | -2.12605300 | 1.84297600  |
| C | 4.99766900  | -2.77398900 | -0.92979900 |
| H | 5.13281300  | -1.49274000 | -2.65874400 |
| H | 4.65528000  | -3.83966200 | 0.91217400  |
| H | 5.65937100  | -3.53456600 | -1.34040000 |
| C | 3.03692400  | 1.98667600  | 0.39077500  |
| C | 2.39720900  | 3.08107100  | -0.19701800 |
| C | 4.38922900  | 2.09844600  | 0.74680300  |
| C | 3.08744900  | 4.27430000  | -0.40233400 |
| H | 1.34727800  | 2.98868000  | -0.47501000 |
| C | 5.07686300  | 3.28918400  | 0.54112500  |
| H | 4.90498200  | 1.24147500  | 1.18245300  |
| C | 4.42356200  | 4.38169800  | -0.02892700 |
| H | 2.57843500  | 5.12171400  | -0.85824500 |
| H | 6.12560100  | 3.36613100  | 0.82545900  |
| H | 4.96000600  | 5.31659900  | -0.18436000 |
| H | 3.20526400  | -0.09135300 | 2.92839200  |
| H | 2.19381500  | 1.35470800  | 2.98119800  |
| C | -1.36145200 | -0.73457700 | 2.93076400  |
| H | -1.21770100 | -1.77777000 | 2.61443300  |
| H | -1.45032900 | -0.73106700 | 4.03048000  |
| C | 1.06962700  | -0.48283400 | 3.11139900  |

|    |             |             |            |
|----|-------------|-------------|------------|
| H  | 1.00995400  | -0.44043200 | 4.21265700 |
| H  | 1.16467400  | -1.54103500 | 2.82831300 |
| Mn | -0.04063900 | 0.15483300  | 0.33298800 |
| C  | 0.11532100  | -1.60834500 | 0.15507000 |
| O  | 0.23026100  | -2.77210900 | 0.05408100 |
| H  | -0.16219600 | 1.77846800  | 0.52746600 |
| H  | -0.30823700 | 0.99476000  | 2.79370000 |
| C  | 1.99039500  | 4.54811800  | 4.33652300 |
| C  | 2.05423700  | 5.59707600  | 5.25754600 |
| C  | 3.11725700  | 4.29202800  | 3.54545000 |
| C  | 3.20893900  | 6.36290000  | 5.39557300 |
| C  | 4.27241800  | 5.05451500  | 3.68016500 |
| H  | 3.09427800  | 3.48943300  | 2.80486700 |
| C  | 4.32427300  | 6.09230400  | 4.60778500 |
| H  | 3.23574100  | 7.17536200  | 6.12028800 |
| H  | 5.13498900  | 4.83381200  | 3.05268200 |
| H  | 5.22850300  | 6.68951100  | 4.71328300 |
| C  | 0.74478000  | 3.71739600  | 4.19085900 |
| H  | 0.93154600  | 2.68019400  | 4.51844900 |
| H  | -0.04876100 | 4.09932000  | 4.84720100 |
| C  | 0.23268200  | 3.67729100  | 2.76360300 |
| H  | 1.00689900  | 3.26567500  | 2.09239400 |
| H  | 0.02135000  | 4.70141100  | 2.41079700 |
| O  | -0.93606900 | 2.87408100  | 2.70687600 |
| H  | -0.99500100 | 2.57311900  | 1.77228100 |
| H  | 1.18216700  | 5.81420700  | 5.87521500 |

### TS-A6

|   |             |             |             |
|---|-------------|-------------|-------------|
| N | 0.01372700  | -0.45542300 | 2.43050400  |
| C | -2.41821300 | -0.38346300 | 2.46235600  |
| H | -2.42940200 | 0.58173400  | 2.98474000  |
| H | -3.34524900 | -0.91479700 | 2.70833300  |
| C | 2.46344200  | -0.40982800 | 2.42965400  |
| C | -0.00201400 | 0.38695600  | -1.36879900 |
| O | 0.00925900  | 0.62613600  | -2.51563100 |
| P | 2.25297100  | 0.02811300  | 0.64254100  |
| P | -2.26454500 | -0.02284400 | 0.65866800  |
| C | -3.26201200 | -1.28270800 | -0.20654600 |
| C | -2.81843800 | -1.78187100 | -1.43588500 |
| C | -4.49569500 | -1.71822600 | 0.29459900  |
| C | -3.58323200 | -2.70429900 | -2.14382900 |
| H | -1.86798700 | -1.44119500 | -1.84284700 |
| C | -5.25591500 | -2.64629300 | -0.40899800 |
| H | -4.87500900 | -1.31675100 | 1.23439200  |
| C | -4.79931600 | -3.14242800 | -1.62912000 |

|   |             |             |             |
|---|-------------|-------------|-------------|
| H | -3.22270800 | -3.08376800 | -3.09786100 |
| H | -6.21032800 | -2.98060900 | -0.00601000 |
| H | -5.39519600 | -3.86932600 | -2.17846600 |
| C | -3.21794700 | 1.51872500  | 0.42021900  |
| C | -4.20035300 | 1.63926500  | -0.56946300 |
| C | -2.90208800 | 2.63064000  | 1.21625900  |
| C | -4.86796100 | 2.84777500  | -0.75189300 |
| H | -4.45087600 | 0.78612900  | -1.19882700 |
| C | -3.57910700 | 3.83106500  | 1.02982800  |
| H | -2.11787800 | 2.55780300  | 1.97696000  |
| C | -4.56150000 | 3.94463100  | 0.04799400  |
| H | -5.63153200 | 2.92970900  | -1.52368800 |
| H | -3.33168900 | 4.68677000  | 1.65608700  |
| H | -5.08486600 | 4.88865600  | -0.09592600 |
| C | 3.29217000  | -1.16825500 | -0.26036500 |
| C | 4.00147700  | -0.78287500 | -1.40324400 |
| C | 3.32855000  | -2.50861900 | 0.14276400  |
| C | 4.74163500  | -1.71830600 | -2.11991800 |
| H | 3.98310300  | 0.25812900  | -1.72547700 |
| C | 4.07190700  | -3.44062200 | -0.57330100 |
| H | 2.76567000  | -2.83106100 | 1.01919500  |
| C | 4.78076200  | -3.04722600 | -1.70579800 |
| H | 5.29439800  | -1.40535700 | -3.00392800 |
| H | 4.09332200  | -4.47874700 | -0.24696500 |
| H | 5.36141300  | -3.77734000 | -2.26674500 |
| C | 3.14030500  | 1.61040200  | 0.44113300  |
| C | 2.66097600  | 2.55598300  | -0.47209200 |
| C | 4.26098000  | 1.92191000  | 1.22103800  |
| C | 3.28134500  | 3.79581800  | -0.59343900 |
| H | 1.78773100  | 2.32381800  | -1.08165800 |
| C | 4.87069600  | 3.16666200  | 1.10841000  |
| H | 4.64978800  | 1.19769600  | 1.93711800  |
| C | 4.37792200  | 4.10668200  | 0.20590500  |
| H | 2.89515300  | 4.52509400  | -1.30309800 |
| H | 5.72184600  | 3.40805500  | 1.74172100  |
| H | 4.85028700  | 5.08452300  | 0.12800800  |
| H | 3.37312200  | -0.99838300 | 2.60553800  |
| H | 2.57183000  | 0.53758800  | 2.97529200  |
| C | -1.18702300 | -1.16641700 | 2.88054400  |
| H | -1.20679500 | -2.18618300 | 2.45674900  |
| H | -1.16958600 | -1.27670500 | 3.97920000  |
| C | 1.21650400  | -1.14177000 | 2.89576700  |
| H | 1.21353000  | -1.21203800 | 3.99891000  |
| H | 1.21668800  | -2.18108900 | 2.51988500  |

|    |             |             |             |
|----|-------------|-------------|-------------|
| Mn | -0.00035800 | -0.02760400 | 0.35440700  |
| C  | 0.04097600  | -1.75181500 | 0.00897200  |
| O  | 0.07506400  | -2.90582100 | -0.18081200 |
| H  | 0.10406200  | 1.76032900  | 0.52826300  |
| H  | -0.09627800 | 0.68055800  | 2.88126200  |
| C  | 2.86135600  | 3.07511000  | 4.58722400  |
| C  | 3.05626900  | 4.43394200  | 4.30594800  |
| C  | 3.99348400  | 2.28863900  | 4.82785500  |
| C  | 4.33269000  | 4.98504600  | 4.27210700  |
| C  | 5.27463900  | 2.83572600  | 4.80152800  |
| H  | 3.86109200  | 1.22779000  | 5.05141600  |
| C  | 5.44873500  | 4.18896900  | 4.52442800  |
| H  | 4.45826100  | 6.04507100  | 4.05397700  |
| H  | 6.13837700  | 2.20364200  | 5.00523500  |
| H  | 6.44788500  | 4.62243400  | 4.50724500  |
| C  | 1.48424300  | 2.48122000  | 4.57512100  |
| H  | 1.53748800  | 1.40622100  | 4.81038600  |
| H  | 0.84847300  | 2.92677900  | 5.35424000  |
| C  | 0.77184700  | 2.64408200  | 3.22051900  |
| H  | 1.50559100  | 2.37008100  | 2.42338700  |
| H  | 0.57711100  | 3.72307500  | 3.05346200  |
| O  | -0.39320100 | 1.91440700  | 3.13738800  |
| H  | -0.23638100 | 1.65651900  | 1.25520100  |
| H  | 2.18971800  | 5.06732200  | 4.11469700  |

**IM-A7**

|   |             |             |             |
|---|-------------|-------------|-------------|
| N | 0.33499600  | -0.21854400 | 2.37605800  |
| C | -2.09812700 | -0.09202500 | 2.51727300  |
| H | -2.12693600 | 0.84650800  | 3.08420900  |
| H | -3.02365100 | -0.64549600 | 2.72043100  |
| C | 2.76965600  | -0.30757800 | 2.27421900  |
| C | 0.16220000  | 0.59238300  | -1.40509400 |
| O | 0.07594600  | 0.82813700  | -2.55097000 |
| P | 2.50629400  | -0.01438500 | 0.47489500  |
| P | -1.94182400 | 0.35781600  | 0.73471700  |
| C | -3.06339700 | -0.77377600 | -0.15350400 |
| C | -3.73285100 | -0.35449800 | -1.30902100 |
| C | -3.18945800 | -2.10538200 | 0.25969700  |
| C | -4.52415000 | -1.24620100 | -2.02614000 |
| H | -3.63964500 | 0.67862700  | -1.64448800 |
| C | -3.98329600 | -2.99393700 | -0.45804500 |
| H | -2.65362200 | -2.45618900 | 1.14256800  |
| C | -4.65357000 | -2.56602400 | -1.60114200 |
| H | -5.04337600 | -0.90678500 | -2.92077200 |
| H | -4.07398100 | -4.02603800 | -0.12411800 |

|    |             |             |             |
|----|-------------|-------------|-------------|
| H  | -5.27338500 | -3.26206900 | -2.16353200 |
| C  | -2.78984400 | 1.96530600  | 0.55674300  |
| C  | -4.05265100 | 2.16558200  | 1.13324200  |
| C  | -2.20513000 | 3.00065700  | -0.17702100 |
| C  | -4.70899100 | 3.38165000  | 0.98546900  |
| H  | -4.52510100 | 1.35817000  | 1.69351000  |
| C  | -2.87219000 | 4.21301800  | -0.34063100 |
| H  | -1.21968400 | 2.86372200  | -0.62425900 |
| C  | -4.11977500 | 4.40686900  | 0.24387400  |
| H  | -5.68699000 | 3.52874200  | 1.44077100  |
| H  | -2.40253900 | 5.00969300  | -0.91352000 |
| H  | -4.63837700 | 5.35656500  | 0.11979100  |
| C  | 3.33640200  | -1.39115800 | -0.38718000 |
| C  | 3.75617300  | -1.22846000 | -1.71249600 |
| C  | 3.48277200  | -2.64175000 | 0.22260500  |
| C  | 4.32991100  | -2.28903700 | -2.40488600 |
| H  | 3.64052600  | -0.26122900 | -2.20287100 |
| C  | 4.05642700  | -3.70189600 | -0.47314000 |
| H  | 3.14017900  | -2.79553200 | 1.24603800  |
| C  | 4.48393900  | -3.52769200 | -1.78588000 |
| H  | 4.65918200  | -2.14622900 | -3.43265900 |
| H  | 4.16691500  | -4.66886200 | 0.01443000  |
| H  | 4.93418400  | -4.35706500 | -2.32819600 |
| C  | 3.54899900  | 1.42646800  | 0.05773900  |
| C  | 3.18257800  | 2.24944600  | -1.01372600 |
| C  | 4.69786500  | 1.74139600  | 0.79441500  |
| C  | 3.95488400  | 3.35761100  | -1.34947900 |
| H  | 2.27876900  | 2.02887500  | -1.58126500 |
| C  | 5.45474000  | 2.86439400  | 0.47261700  |
| H  | 5.00064200  | 1.10871600  | 1.62871500  |
| C  | 5.08601400  | 3.67227500  | -0.60140300 |
| H  | 3.65823500  | 3.98727800  | -2.18645200 |
| H  | 6.33699600  | 3.10842200  | 1.06163800  |
| H  | 5.67965200  | 4.54968600  | -0.85147200 |
| H  | 3.67171600  | -0.89755200 | 2.48287900  |
| H  | 2.90119600  | 0.68192900  | 2.73472000  |
| C  | -0.85276700 | -0.88183000 | 2.89190700  |
| H  | -0.93847800 | -1.92549800 | 2.51619600  |
| H  | -0.79406600 | -0.96543700 | 3.99408900  |
| C  | 1.50519500  | -0.95600800 | 2.81334200  |
| H  | 1.55194700  | -0.98641400 | 3.91891400  |
| H  | 1.46580700  | -2.02054200 | 2.48920900  |
| Mn | 0.26483100  | 0.17567600  | 0.31650500  |
| C  | 0.10920600  | -1.54904400 | -0.02015900 |

|   |             |             |             |
|---|-------------|-------------|-------------|
| O | 0.02131500  | -2.69956400 | -0.19704400 |
| H | 0.84739200  | 1.81940100  | 0.72921700  |
| H | 0.12293700  | 1.34363300  | 3.05747300  |
| O | -0.15430200 | 2.23016600  | 3.45733700  |
| C | 0.73122000  | 4.19341100  | 2.29525800  |
| C | -0.46182600 | 4.94994400  | 2.26179100  |
| C | 1.72787300  | 4.46120700  | 1.35993000  |
| C | -0.58895200 | 5.97147100  | 1.30893100  |
| C | 1.58727000  | 5.45937500  | 0.39759500  |
| H | 2.64366300  | 3.86540800  | 1.39197100  |
| C | 0.42062100  | 6.22034700  | 0.38721800  |
| H | -1.50451700 | 6.56491900  | 1.29367800  |
| H | 2.38278200  | 5.64509500  | -0.32151500 |
| H | 0.28965800  | 7.01406900  | -0.34781100 |
| C | 0.92466800  | 3.14018400  | 3.35404600  |
| H | 1.04349200  | 3.62645300  | 4.33791900  |
| H | 1.87266200  | 2.60549800  | 3.15589300  |
| H | 0.05881800  | 1.87634600  | 0.88457300  |
| N | -1.45759600 | 4.71712700  | 3.20029300  |
| H | -2.37441900 | 5.03612600  | 2.91456900  |
| H | -1.47456100 | 3.75447000  | 3.52484000  |

**IM-A8**

|   |             |             |             |
|---|-------------|-------------|-------------|
| N | -0.02399900 | -0.37031300 | 2.40315500  |
| C | -2.45320400 | -0.26801300 | 2.37431500  |
| H | -2.47964500 | 0.69571400  | 2.89855500  |
| H | -3.39967500 | -0.78747500 | 2.57258200  |
| C | 2.40440200  | -0.37675200 | 2.47603200  |
| C | 0.08267700  | 0.66844000  | -1.33052400 |
| O | 0.12108900  | 0.97762600  | -2.46145200 |
| P | 2.25705800  | 0.00486700  | 0.68178400  |
| P | -2.21121200 | 0.11453000  | 0.59315200  |
| C | -3.10926500 | -1.17360900 | -0.33511300 |
| C | -3.34066200 | -0.97089200 | -1.70214100 |
| C | -3.49220300 | -2.38664300 | 0.24450300  |
| C | -3.95749200 | -1.95370300 | -2.46647800 |
| H | -3.03696700 | -0.03226900 | -2.16806400 |
| C | -4.10947800 | -3.37071500 | -0.52400700 |
| H | -3.30040800 | -2.57585200 | 1.30042700  |
| C | -4.34524700 | -3.15632400 | -1.87810500 |
| H | -4.13528800 | -1.78079100 | -3.52646800 |
| H | -4.40372700 | -4.31052200 | -0.05982700 |
| H | -4.82684300 | -3.92715500 | -2.47710000 |
| C | -3.22002600 | 1.59869000  | 0.25894400  |
| C | -4.58317900 | 1.61753100  | 0.58345100  |

|    |             |             |             |
|----|-------------|-------------|-------------|
| C  | -2.64507200 | 2.72718400  | -0.33044800 |
| C  | -5.34874400 | 2.75074800  | 0.33653700  |
| H  | -5.04603400 | 0.73493700  | 1.02668800  |
| C  | -3.41468700 | 3.86032600  | -0.58421800 |
| H  | -1.58952100 | 2.71081800  | -0.60138500 |
| C  | -4.76451400 | 3.87413200  | -0.24759100 |
| H  | -6.40552200 | 2.75801400  | 0.59733700  |
| H  | -2.95701500 | 4.73266800  | -1.04729700 |
| H  | -5.36610200 | 4.75968700  | -0.44492800 |
| C  | 3.14493800  | -1.32745700 | -0.19097100 |
| C  | 3.47701300  | -1.14165500 | -1.53940300 |
| C  | 3.42030900  | -2.55815500 | 0.41240300  |
| C  | 4.09173400  | -2.15880300 | -2.25995600 |
| H  | 3.25230900  | -0.19091400 | -2.02525700 |
| C  | 4.03419900  | -3.57661800 | -0.31245300 |
| H  | 3.14523600  | -2.73359200 | 1.45201100  |
| C  | 4.37354300  | -3.37858300 | -1.64674900 |
| H  | 4.34930700  | -1.99950300 | -3.30556400 |
| H  | 4.24295900  | -4.53012400 | 0.16966400  |
| H  | 4.85330300  | -4.17562600 | -2.21176700 |
| C  | 3.37440000  | 1.43121100  | 0.43611700  |
| C  | 2.89274400  | 2.64648700  | -0.05700200 |
| C  | 4.72913300  | 1.32500300  | 0.78236700  |
| C  | 3.74133500  | 3.74480100  | -0.18202300 |
| H  | 1.84715200  | 2.72964700  | -0.35441200 |
| C  | 5.57527400  | 2.42040300  | 0.65687100  |
| H  | 5.11913200  | 0.37454800  | 1.14865600  |
| C  | 5.07996600  | 3.63387600  | 0.17879700  |
| H  | 3.35389600  | 4.68720500  | -0.56378500 |
| H  | 6.62474100  | 2.32964400  | 0.93331500  |
| H  | 5.74237600  | 4.49301100  | 0.08692100  |
| H  | 3.32055000  | -0.92830100 | 2.72514100  |
| H  | 2.45791200  | 0.59586100  | 2.98541100  |
| C  | -1.23289900 | -1.06346300 | 2.81624600  |
| H  | -1.28492400 | -2.09808000 | 2.40745400  |
| H  | -1.25058000 | -1.17686100 | 3.91752000  |
| C  | 1.13233900  | -1.10233000 | 2.88251000  |
| H  | 1.09878300  | -1.19704700 | 3.98580900  |
| H  | 1.15850000  | -2.14667200 | 2.49607400  |
| Mn | 0.03399600  | 0.13954200  | 0.36435600  |
| C  | 0.00234900  | -1.56559800 | -0.08997000 |
| O  | -0.02283600 | -2.70321600 | -0.34629300 |
| H  | 0.43190500  | 1.80350700  | 0.89385700  |
| H  | -0.28380800 | 1.22084200  | 3.13856300  |

|   |             |            |            |
|---|-------------|------------|------------|
| C | 2.68334800  | 3.43775700 | 4.83971200 |
| C | 2.85612500  | 4.41075800 | 5.82828300 |
| C | 3.69877200  | 3.27720700 | 3.88802900 |
| C | 4.00689900  | 5.19380000 | 5.87455600 |
| C | 4.84986000  | 4.05683500 | 3.92986700 |
| H | 3.58693900  | 2.53408300 | 3.09454200 |
| C | 5.00902300  | 5.01931700 | 4.92420300 |
| H | 4.12027100  | 5.94343800 | 6.65639200 |
| H | 5.62545000  | 3.91039800 | 3.17906200 |
| H | 5.90976200  | 5.63001900 | 4.95779800 |
| C | 1.42670300  | 2.61971200 | 4.76027200 |
| H | 1.66104400  | 1.54284600 | 4.78540200 |
| H | 0.78343000  | 2.81040900 | 5.62928400 |
| C | 0.62367700  | 2.90618600 | 3.48748100 |
| H | 1.28845200  | 2.74181500 | 2.60988400 |
| H | 0.34670700  | 3.97000500 | 3.46565400 |
| O | -0.55197800 | 2.15627000 | 3.39409700 |
| H | -0.35952300 | 1.76867000 | 1.04904300 |
| H | 2.07303500  | 4.55202400 | 6.57409600 |

**IM-A9**

|   |             |             |             |
|---|-------------|-------------|-------------|
| N | 0.20977500  | -0.13789600 | 2.02717800  |
| C | -2.21031900 | 0.06782400  | 2.33254200  |
| H | -2.22777500 | 0.99510200  | 2.92005600  |
| H | -3.13039900 | -0.49083500 | 2.54302100  |
| C | 2.61928600  | 0.20026200  | 2.25133600  |
| C | 0.23846500  | 1.91001000  | -0.90708400 |
| O | 0.28772500  | 2.77363700  | -1.70275300 |
| P | 2.44109100  | 0.34964200  | 0.43537800  |
| P | -2.07200200 | 0.55084900  | 0.55369000  |
| C | -3.06199300 | -0.73541700 | -0.29398700 |
| C | -4.29330800 | -0.48237100 | -0.90680900 |
| C | -2.55439900 | -2.04212400 | -0.30417900 |
| C | -5.00442700 | -1.51718500 | -1.51053800 |
| H | -4.70025300 | 0.52776100  | -0.91507400 |
| C | -3.27193000 | -3.07484600 | -0.89579900 |
| H | -1.57827300 | -2.24293800 | 0.13920800  |
| C | -4.49933900 | -2.81384400 | -1.50204000 |
| H | -5.95887300 | -1.30586000 | -1.98983300 |
| H | -2.86454600 | -4.08415600 | -0.89588500 |
| H | -5.05701700 | -3.62042400 | -1.97467500 |
| C | -3.13165500 | 2.03944500  | 0.44870300  |
| C | -4.20580200 | 2.21751200  | 1.33287000  |
| C | -2.87514700 | 3.02842800  | -0.50777700 |
| C | -4.99093100 | 3.36521200  | 1.27566900  |

|    |             |             |             |
|----|-------------|-------------|-------------|
| H  | -4.43164300 | 1.45229000  | 2.07487100  |
| C  | -3.66457000 | 4.17577100  | -0.56642600 |
| H  | -2.04358700 | 2.91532600  | -1.19867400 |
| C  | -4.71821400 | 4.35039700  | 0.32776000  |
| H  | -5.81572000 | 3.49173000  | 1.97463500  |
| H  | -3.44626000 | 4.93982600  | -1.31064100 |
| H  | -5.32672900 | 5.25190000  | 0.28710000  |
| C  | 3.15793200  | -1.19320200 | -0.24512100 |
| C  | 3.19560600  | -1.34382400 | -1.63788100 |
| C  | 3.64389900  | -2.23220600 | 0.55583800  |
| C  | 3.71263900  | -2.49740200 | -2.21394400 |
| H  | 2.80865300  | -0.55087000 | -2.27796200 |
| C  | 4.15519100  | -3.39214200 | -0.02263300 |
| H  | 3.63039400  | -2.14564900 | 1.64100400  |
| C  | 4.19241100  | -3.52711900 | -1.40674300 |
| H  | 3.73365500  | -2.59554200 | -3.29760700 |
| H  | 4.52889900  | -4.19126800 | 0.61542200  |
| H  | 4.59278000  | -4.43353200 | -1.85713900 |
| C  | 3.66987500  | 1.59879000  | -0.08062700 |
| C  | 3.53960400  | 2.22574600  | -1.32493300 |
| C  | 4.75669700  | 1.93136100  | 0.73623700  |
| C  | 4.47785000  | 3.16471200  | -1.74310400 |
| H  | 2.68846000  | 1.99501400  | -1.96271600 |
| C  | 5.68883400  | 2.87787600  | 0.32131700  |
| H  | 4.87787900  | 1.45210600  | 1.70730900  |
| C  | 5.55195200  | 3.49524300  | -0.92027900 |
| H  | 4.36068800  | 3.64820100  | -2.71121300 |
| H  | 6.52597900  | 3.13217600  | 0.96927300  |
| H  | 6.28089200  | 4.23596500  | -1.24429200 |
| H  | 3.56980000  | -0.23721200 | 2.58250200  |
| H  | 2.56601300  | 1.22760100  | 2.63984600  |
| C  | -0.96486300 | -0.71969400 | 2.68475000  |
| H  | -1.07940400 | -1.78231200 | 2.40163800  |
| H  | -0.82842700 | -0.71023400 | 3.78015600  |
| C  | 1.41380700  | -0.58939300 | 2.72545300  |
| H  | 1.28587400  | -0.45908000 | 3.81529500  |
| H  | 1.57393100  | -1.67311500 | 2.56499700  |
| Mn | 0.18577700  | 0.55262400  | 0.22624400  |
| C  | 0.09375000  | -0.49595500 | -1.16281600 |
| O  | 0.02672700  | -1.22600000 | -2.07975000 |
| H  | 0.01953200  | 1.48157900  | 3.16607300  |
| O  | -0.21331100 | 1.99501000  | 3.97272500  |
| C  | 0.91231400  | 3.77822400  | 2.73795600  |
| C  | -0.20174600 | 4.28775500  | 2.03017600  |

|   |             |            |             |
|---|-------------|------------|-------------|
| C | 2.18973400  | 3.95230900 | 2.20891900  |
| C | 0.01559600  | 4.94556300 | 0.81235700  |
| C | 2.40237600  | 4.61731800 | 1.00412200  |
| H | 3.04162300  | 3.55755400 | 2.76867100  |
| C | 1.30096800  | 5.10792100 | 0.30913800  |
| H | -0.84360300 | 5.32315900 | 0.25627700  |
| H | 3.40906900  | 4.72641200 | 0.60536600  |
| H | 1.43799100  | 5.60143600 | -0.65210200 |
| C | 0.70613500  | 3.08176100 | 4.04896900  |
| H | 0.27589200  | 3.76510700 | 4.79582800  |
| H | 1.68025900  | 2.74249900 | 4.44726000  |
| N | -1.47211000 | 4.19560700 | 2.58387500  |
| H | -2.22720900 | 4.31465400 | 1.91943300  |
| H | -1.59938600 | 3.37423500 | 3.16686900  |

**IM-A10**

|   |             |             |             |
|---|-------------|-------------|-------------|
| N | -0.03923900 | -0.67108500 | 2.18459700  |
| C | -2.46942300 | -0.40514600 | 2.40254500  |
| H | -2.48940300 | 0.54674600  | 2.94887100  |
| H | -3.41669200 | -0.91893500 | 2.60931500  |
| C | 2.38467500  | -0.42996100 | 2.51745300  |
| C | -0.07117700 | 1.94098600  | 0.05340000  |
| O | -0.15927900 | 3.08960500  | -0.17790800 |
| P | 2.23812700  | -0.01771900 | 0.73255200  |
| P | -2.25609700 | 0.04745200  | 0.63673200  |
| C | -2.98415700 | -1.31003000 | -0.33691400 |
| C | -3.01448800 | -1.19418400 | -1.73498400 |
| C | -3.43430800 | -2.49913700 | 0.24792300  |
| C | -3.49759000 | -2.23229700 | -2.52199800 |
| H | -2.65032600 | -0.28323100 | -2.20911400 |
| C | -3.90745100 | -3.54283200 | -0.54328300 |
| H | -3.41605400 | -2.62076500 | 1.32978100  |
| C | -3.94294800 | -3.41167100 | -1.92794800 |
| H | -3.51599000 | -2.12333500 | -3.60472000 |
| H | -4.25200000 | -4.46206400 | -0.07235200 |
| H | -4.31233000 | -4.22884400 | -2.54503900 |
| C | -3.37833400 | 1.47095800  | 0.42494700  |
| C | -4.52518700 | 1.45528200  | -0.37505600 |
| C | -3.05414900 | 2.63360800  | 1.13994000  |
| C | -5.33540500 | 2.58510900  | -0.45884100 |
| H | -4.79397800 | 0.55734800  | -0.92946300 |
| C | -3.87226400 | 3.75380200  | 1.05842300  |
| H | -2.15988300 | 2.65338500  | 1.76751300  |
| C | -5.01211800 | 3.73416700  | 0.25684100  |
| H | -6.22651800 | 2.56279300  | -1.08394000 |

|    |             |             |             |
|----|-------------|-------------|-------------|
| H  | -3.61314200 | 4.64979700  | 1.61962100  |
| H  | -5.64813100 | 4.61530200  | 0.19020400  |
| C  | 2.92746500  | -1.46616000 | -0.14506600 |
| C  | 3.16252100  | -1.35958200 | -1.52320600 |
| C  | 3.17501800  | -2.68963600 | 0.48686900  |
| C  | 3.63747200  | -2.44650000 | -2.24629800 |
| H  | 2.96716600  | -0.41605200 | -2.03274900 |
| C  | 3.64730200  | -3.77977900 | -0.24047600 |
| H  | 3.00128300  | -2.80155800 | 1.55607000  |
| C  | 3.87957200  | -3.66118000 | -1.60692300 |
| H  | 3.81517000  | -2.34594100 | -3.31543700 |
| H  | 3.83571700  | -4.72470900 | 0.26675700  |
| H  | 4.24745900  | -4.51390300 | -2.17478500 |
| C  | 3.55654800  | 1.22964300  | 0.49831100  |
| C  | 3.25068500  | 2.55611700  | 0.18071000  |
| C  | 4.89670100  | 0.86759800  | 0.70101900  |
| C  | 4.26528600  | 3.50525900  | 0.07170400  |
| H  | 2.21720400  | 2.85223900  | 0.01915500  |
| C  | 5.90667700  | 1.81715900  | 0.59459800  |
| H  | 5.14731100  | -0.16830000 | 0.93305800  |
| C  | 5.59087900  | 3.13814300  | 0.27742600  |
| H  | 4.01347000  | 4.53579200  | -0.17028200 |
| H  | 6.94363500  | 1.52572500  | 0.75437400  |
| H  | 6.38201600  | 3.88143500  | 0.19055700  |
| H  | 3.30317400  | -0.97831700 | 2.76578200  |
| H  | 2.43769500  | 0.53751700  | 3.03725500  |
| C  | -1.25111700 | -1.20755900 | 2.81407000  |
| H  | -1.37365300 | -2.27397000 | 2.54767300  |
| H  | -1.14650600 | -1.18132300 | 3.91369000  |
| C  | 1.12335100  | -1.16848300 | 2.92226000  |
| H  | 0.95574400  | -1.05246300 | 4.00955700  |
| H  | 1.23864600  | -2.25623900 | 2.75631200  |
| Mn | 0.00138000  | 0.24469800  | 0.49154400  |
| C  | 0.05210600  | -0.16813100 | -1.21440900 |
| O  | 0.09218900  | -0.47684500 | -2.34642700 |
| H  | -0.23053200 | 1.18804800  | 2.87193200  |
| C  | 2.67838500  | 3.72619200  | 4.52310100  |
| C  | 2.66605000  | 4.93559200  | 5.22360000  |
| C  | 3.81268600  | 3.40930800  | 3.76680800  |
| C  | 3.75654000  | 5.79976800  | 5.18283700  |
| C  | 4.90555700  | 4.26922200  | 3.72312500  |
| H  | 3.84111300  | 2.47305600  | 3.20340600  |
| C  | 4.88171500  | 5.46748800  | 4.43309600  |
| H  | 3.72885500  | 6.73393000  | 5.74206700  |

|   |             |            |            |
|---|-------------|------------|------------|
| H | 5.77992100  | 3.99752500 | 3.13382000 |
| H | 5.73854100  | 6.13869800 | 4.40381000 |
| C | 1.48646600  | 2.81446700 | 4.53848300 |
| H | 1.79551100  | 1.77308200 | 4.72392000 |
| H | 0.80508200  | 3.07995100 | 5.35768100 |
| C | 0.70042300  | 2.86158900 | 3.22909700 |
| H | 1.35676100  | 2.56609500 | 2.38756400 |
| H | 0.38271800  | 3.89347200 | 3.02091300 |
| O | -0.45574300 | 2.05324100 | 3.28051100 |
| H | 1.78703900  | 5.19673100 | 5.81397100 |

**IM-A11**

|   |             |             |             |
|---|-------------|-------------|-------------|
| N | -0.28043700 | -0.25390800 | -1.82064900 |
| C | -2.25732200 | -1.64620900 | -1.97814100 |
| H | -1.69199000 | -2.58055100 | -1.86828400 |
| H | -3.18720800 | -1.87245000 | -2.51672200 |
| C | 1.79808200  | 0.98206100  | -1.66815400 |
| C | -1.12786300 | 0.62927300  | 1.83200900  |
| O | -1.39450800 | 0.89852900  | 2.94364200  |
| P | 1.12367500  | 1.49405400  | -0.03857400 |
| P | -2.55748800 | -1.02104200 | -0.27414500 |
| C | -4.18836500 | -0.20320400 | -0.32074000 |
| C | -4.87576400 | 0.01264100  | 0.88060500  |
| C | -4.72839000 | 0.29466800  | -1.51028900 |
| C | -6.08741900 | 0.69366600  | 0.88643200  |
| H | -4.45782600 | -0.35993400 | 1.81683200  |
| C | -5.94146800 | 0.97807000  | -1.50164600 |
| H | -4.19432900 | 0.16132900  | -2.45109300 |
| C | -6.62432600 | 1.17629700  | -0.30571600 |
| H | -6.61345300 | 0.85028200  | 1.82670600  |
| H | -6.35062000 | 1.36002000  | -2.43526000 |
| H | -7.57198900 | 1.71214400  | -0.30012100 |
| C | -2.93356500 | -2.50800300 | 0.72223000  |
| C | -3.97666000 | -3.35928800 | 0.33337700  |
| C | -2.20101000 | -2.81234800 | 1.87218000  |
| C | -4.26898500 | -4.49940400 | 1.07159200  |
| H | -4.56907000 | -3.11621900 | -0.54947400 |
| C | -2.49770500 | -3.95362100 | 2.61577400  |
| H | -1.40454700 | -2.14018600 | 2.19414100  |
| C | -3.52768800 | -4.79834200 | 2.21445000  |
| H | -5.08010100 | -5.15523900 | 0.75950600  |
| H | -1.92403400 | -4.17930100 | 3.51295700  |
| H | -3.75991600 | -5.68887400 | 2.79595700  |
| C | 0.91317800  | 3.30463900  | -0.12854500 |
| C | 0.58058200  | 3.99443900  | 1.04545900  |

|           |             |             |             |
|-----------|-------------|-------------|-------------|
| C         | 0.95623600  | 4.00642900  | -1.33640000 |
| C         | 0.30849500  | 5.35642000  | 1.01058300  |
| H         | 0.52918500  | 3.45483100  | 1.99234000  |
| C         | 0.68011400  | 5.37138000  | -1.36927700 |
| H         | 1.18882000  | 3.48761700  | -2.26535700 |
| C         | 0.35646600  | 6.04854800  | -0.19841200 |
| H         | 0.05174100  | 5.87954400  | 1.93013800  |
| H         | 0.71322600  | 5.90431700  | -2.31812200 |
| H         | 0.13535000  | 7.11401800  | -0.22661500 |
| C         | 2.50758900  | 1.32283500  | 1.14284800  |
| C         | 2.39699100  | 0.47246200  | 2.24596100  |
| C         | 3.70148600  | 2.02940500  | 0.94367400  |
| C         | 3.46428600  | 0.31783700  | 3.12836600  |
| H         | 1.46135200  | -0.06006000 | 2.42015300  |
| C         | 4.76777300  | 1.87026500  | 1.82075000  |
| H         | 3.78820400  | 2.71417000  | 0.09900900  |
| C         | 4.65074100  | 1.01168700  | 2.91334700  |
| H         | 3.36550400  | -0.34369700 | 3.98712900  |
| H         | 5.69304000  | 2.41969900  | 1.65480300  |
| H         | 5.48526800  | 0.89085000  | 3.60199700  |
| H         | 2.46826900  | 1.72929600  | -2.11340600 |
| H         | 2.38091500  | 0.06972700  | -1.48676500 |
| C         | -1.38997100 | -0.60628100 | -2.67220200 |
| H         | -2.01938100 | 0.27106000  | -2.96361500 |
| H         | -1.02049200 | -1.02377500 | -3.63011800 |
| C         | 0.59062800  | 0.65022100  | -2.53281300 |
| H         | 0.93548700  | 0.18656600  | -3.47854500 |
| H         | 0.08498800  | 1.59865800  | -2.84165400 |
| Mn        | -0.76844600 | 0.28322100  | 0.12459700  |
| C         | -1.67797200 | 1.68067400  | -0.44390900 |
| O         | -2.26096700 | 2.59949700  | -0.86387400 |
| H         | 0.52485000  | -0.93388400 | 0.56357000  |
| H         | -0.13510400 | -1.38759200 | 0.51134200  |
| <b>2a</b> |             |             |             |
| C         | 0.28088400  | -0.09758200 | -0.13302000 |
| C         | -0.34603400 | 1.13563100  | 0.06881700  |
| C         | -0.51676500 | -1.24398200 | -0.20250800 |
| C         | -1.72947100 | 1.22400700  | 0.19232500  |
| C         | -1.90076900 | -1.16169200 | -0.07964400 |
| H         | -0.04121000 | -2.21292700 | -0.36140600 |
| C         | -2.51163100 | 0.07411900  | 0.11819700  |
| H         | -2.19929900 | 2.19467500  | 0.34327000  |
| H         | -2.50475800 | -2.06558700 | -0.14220800 |
| H         | -3.59419000 | 0.14118800  | 0.21062700  |

|   |            |             |             |
|---|------------|-------------|-------------|
| C | 1.77709000 | -0.19269900 | -0.21388100 |
| H | 2.08467600 | -1.02087400 | -0.86618200 |
| H | 2.20478400 | 0.72324400  | -0.64326400 |
| C | 2.39993200 | -0.40920700 | 1.15435100  |
| H | 1.99477300 | -1.33744700 | 1.59858200  |
| H | 2.10576000 | 0.41915300  | 1.82541300  |
| O | 3.80005500 | -0.47605500 | 0.98663400  |
| H | 4.19362600 | -0.60973500 | 1.85820800  |
| H | 0.26380200 | 2.03847600  | 0.12338000  |

**IM-B1**

|   |             |             |             |
|---|-------------|-------------|-------------|
| N | -0.06042100 | -1.47319600 | -1.26494500 |
| C | 2.36292700  | -1.53823800 | -1.40072300 |
| H | 2.36849600  | -1.04296500 | -2.38300200 |
| H | 3.27222000  | -2.14971000 | -1.33969900 |
| C | -2.48426700 | -1.30735200 | -1.35391400 |
| C | 0.10427600  | 1.72535600  | 0.88794500  |
| O | 0.15751700  | 2.72292600  | 1.51089500  |
| P | -2.23003100 | 0.10682600  | -0.19365900 |
| P | 2.25885400  | -0.21098000 | -0.13420700 |
| C | 2.97762900  | -0.91868400 | 1.39317400  |
| C | 2.92228400  | -0.12906700 | 2.54966200  |
| C | 3.52983200  | -2.19881900 | 1.47567000  |
| C | 3.42280300  | -0.60271800 | 3.75526600  |
| H | 2.46258200  | 0.85987500  | 2.50344700  |
| C | 4.02167600  | -2.67741400 | 2.68874200  |
| H | 3.57106900  | -2.84093000 | 0.59730900  |
| C | 3.97395400  | -1.88079100 | 3.82781000  |
| H | 3.37212200  | 0.02310600  | 4.64426500  |
| H | 4.44184700  | -3.68056600 | 2.74059100  |
| H | 4.35746500  | -2.25776400 | 4.77409700  |
| C | 3.55067000  | 1.01105300  | -0.57577400 |
| C | 4.66233800  | 0.67495000  | -1.35869900 |
| C | 3.46929300  | 2.30035300  | -0.03277600 |
| C | 5.67408900  | 1.60545700  | -1.58449400 |
| H | 4.74652700  | -0.32478300 | -1.78487100 |
| C | 4.48716200  | 3.22433100  | -0.24937900 |
| H | 2.60286300  | 2.57997800  | 0.56685800  |
| C | 5.59258400  | 2.87776800  | -1.02263300 |
| H | 6.53289900  | 1.33157800  | -2.19535200 |
| H | 4.40918100  | 4.22254600  | 0.17727800  |
| H | 6.38416500  | 3.60410900  | -1.19871800 |
| C | -3.20208700 | -0.29878000 | 1.29456300  |
| C | -3.57224200 | 0.73327700  | 2.16646700  |
| C | -3.50408100 | -1.61916800 | 1.64192200  |

|    |             |             |             |
|----|-------------|-------------|-------------|
| C  | -4.24753900 | 0.45018300  | 3.34794800  |
| H  | -3.33082400 | 1.76653300  | 1.91342600  |
| C  | -4.17902700 | -1.90087200 | 2.82632700  |
| H  | -3.20064100 | -2.43890100 | 0.99070400  |
| C  | -4.55530400 | -0.86794400 | 3.67950200  |
| H  | -4.53431800 | 1.26299900  | 4.01311100  |
| H  | -4.40839600 | -2.93352000 | 3.08332500  |
| H  | -5.08343200 | -1.08927800 | 4.60538700  |
| C  | -3.18265900 | 1.48696900  | -0.91762200 |
| C  | -2.57414300 | 2.73315500  | -1.08556600 |
| C  | -4.51904200 | 1.32231900  | -1.30255900 |
| C  | -3.28475100 | 3.79646200  | -1.63693800 |
| H  | -1.53517000 | 2.85945600  | -0.78457200 |
| C  | -5.22617600 | 2.38255000  | -1.85955400 |
| H  | -5.00986500 | 0.35896100  | -1.15784700 |
| C  | -4.60877200 | 3.62148600  | -2.02816300 |
| H  | -2.80007800 | 4.76409700  | -1.76125300 |
| H  | -6.26388900 | 2.24418100  | -2.15914900 |
| H  | -5.16409800 | 4.45110700  | -2.46277800 |
| H  | -3.44437500 | -1.81690200 | -1.19956900 |
| H  | -2.49559600 | -0.87569400 | -2.36375000 |
| C  | 1.08823400  | -2.35786500 | -1.25070600 |
| H  | 1.14331800  | -2.95499900 | -0.31401000 |
| H  | 1.02237100  | -3.09664800 | -2.07260900 |
| C  | -1.29030200 | -2.24087800 | -1.20924800 |
| H  | -1.31422800 | -2.99623300 | -2.01842600 |
| H  | -1.37276100 | -2.81681300 | -0.26187600 |
| Mn | 0.02637700  | 0.19617700  | 0.00112000  |
| C  | -0.07148900 | -0.75916100 | 1.46202800  |
| O  | -0.16076700 | -1.45477200 | 2.40012400  |
| C  | 1.76801200  | 3.92462400  | -3.30482700 |
| C  | 1.31568000  | 5.05244500  | -3.99479200 |
| C  | 3.12086000  | 3.58247300  | -3.40840500 |
| C  | 2.18744000  | 5.82349900  | -4.75897700 |
| C  | 3.99559400  | 4.35001300  | -4.17028200 |
| H  | 3.49529300  | 2.70601700  | -2.87953000 |
| C  | 3.53245100  | 5.47495800  | -4.84872800 |
| H  | 1.81379900  | 6.69926800  | -5.28762300 |
| H  | 5.04589800  | 4.06558000  | -4.22934400 |
| H  | 4.21549600  | 6.07661100  | -5.44608300 |
| C  | 0.82575400  | 3.09497300  | -2.47831300 |
| H  | 1.06045600  | 3.18538500  | -1.40417200 |
| H  | -0.20290000 | 3.46023800  | -2.60095200 |
| C  | 0.85839700  | 1.62542000  | -2.84846000 |

|              |             |             |             |
|--------------|-------------|-------------|-------------|
| H            | 1.86659300  | 1.21216900  | -2.66736500 |
| H            | 0.63996400  | 1.50257800  | -3.92114900 |
| O            | -0.11448200 | 0.92402800  | -2.09197100 |
| H            | -0.04755700 | -0.08648300 | -2.23486500 |
| H            | 0.26216500  | 5.32759200  | -3.92881800 |
| <b>TS-B1</b> |             |             |             |
| N            | -0.01809700 | -1.42179000 | -1.28458100 |
| C            | 2.40850900  | -1.47967600 | -1.35779500 |
| H            | 2.45005200  | -0.98825400 | -2.34045900 |
| H            | 3.31365800  | -2.09314600 | -1.26563700 |
| C            | -2.42408100 | -1.19079600 | -1.48889100 |
| C            | 0.09538400  | 1.80402800  | 0.84717300  |
| O            | 0.13173200  | 2.82023700  | 1.43886100  |
| P            | -2.21756400 | 0.15070500  | -0.24070400 |
| P            | 2.27584300  | -0.14197000 | -0.10025800 |
| C            | 2.98223700  | -0.83537600 | 1.43904700  |
| C            | 2.94419000  | -0.02501600 | 2.58180100  |
| C            | 3.50503600  | -2.12600700 | 1.54448000  |
| C            | 3.43311000  | -0.48942900 | 3.79574400  |
| H            | 2.51012600  | 0.97447100  | 2.51829700  |
| C            | 3.98688400  | -2.59447500 | 2.76546400  |
| H            | 3.53240100  | -2.78423400 | 0.67752200  |
| C            | 3.95630800  | -1.77778500 | 3.89061500  |
| H            | 3.39642300  | 0.15252600  | 4.67387300  |
| H            | 4.38582700  | -3.60521100 | 2.83435900  |
| H            | 4.33190700  | -2.14646300 | 4.84330600  |
| C            | 3.56584500  | 1.07963700  | -0.54416300 |
| C            | 4.70736700  | 0.72540300  | -1.27479200 |
| C            | 3.44838400  | 2.39003900  | -0.06309900 |
| C            | 5.71012000  | 1.66150000  | -1.51474300 |
| H            | 4.82009600  | -0.29153000 | -1.65095000 |
| C            | 4.45656000  | 3.32109800  | -0.29552500 |
| H            | 2.56124600  | 2.68139700  | 0.49928800  |
| C            | 5.58902000  | 2.95850800  | -1.02024900 |
| H            | 6.59107800  | 1.37474200  | -2.08694000 |
| H            | 4.35012800  | 4.33659300  | 0.08138100  |
| H            | 6.37240600  | 3.69028300  | -1.20975600 |
| C            | -3.18582700 | -0.36282200 | 1.21653300  |
| C            | -3.32401500 | 0.56244900  | 2.26040700  |
| C            | -3.72224500 | -1.64349000 | 1.37349400  |
| C            | -4.00114900 | 0.21968100  | 3.42361800  |
| H            | -2.89284100 | 1.55933700  | 2.15580600  |
| C            | -4.39726300 | -1.98745600 | 2.54296400  |
| H            | -3.60991600 | -2.38740800 | 0.58555800  |

|    |             |             |             |
|----|-------------|-------------|-------------|
| C  | -4.54154800 | -1.05757100 | 3.56701500  |
| H  | -4.10475000 | 0.95065700  | 4.22357700  |
| H  | -4.81012800 | -2.98896500 | 2.65215400  |
| H  | -5.06988400 | -1.32784800 | 4.47964000  |
| C  | -3.19625900 | 1.54961000  | -0.88629300 |
| C  | -2.55886200 | 2.75853100  | -1.17322600 |
| C  | -4.57653500 | 1.43489200  | -1.09413500 |
| C  | -3.28649100 | 3.83613700  | -1.67120400 |
| H  | -1.48672800 | 2.84040000  | -1.00406900 |
| C  | -5.30164200 | 2.51073100  | -1.59455100 |
| H  | -5.08577600 | 0.50128000  | -0.84994700 |
| C  | -4.65657500 | 3.71249600  | -1.88451700 |
| H  | -2.78017600 | 4.77569900  | -1.88942600 |
| H  | -6.37446900 | 2.41457400  | -1.75377400 |
| H  | -5.22682200 | 4.55526900  | -2.27210900 |
| H  | -3.40593800 | -1.67879800 | -1.44251300 |
| H  | -2.34481700 | -0.70139600 | -2.46817900 |
| C  | 1.13335100  | -2.30514400 | -1.25316300 |
| H  | 1.15095500  | -2.90371000 | -0.31974800 |
| H  | 1.09054000  | -3.03439700 | -2.08369600 |
| C  | -1.26815300 | -2.16454500 | -1.30687400 |
| H  | -1.26719700 | -2.90349100 | -2.12995500 |
| H  | -1.40204400 | -2.74505800 | -0.37188500 |
| Mn | 0.03890400  | 0.25669700  | -0.00264900 |
| C  | -0.06853800 | -0.66210500 | 1.48597600  |
| O  | -0.15778100 | -1.32672100 | 2.44623100  |
| C  | 1.83256600  | 3.79489700  | -3.43427000 |
| C  | 1.39949400  | 4.89581600  | -4.17868700 |
| C  | 3.18251300  | 3.43421200  | -3.51294200 |
| C  | 2.28548100  | 5.62203700  | -4.96999200 |
| C  | 4.07156100  | 4.15610100  | -4.30215700 |
| H  | 3.54303600  | 2.57904600  | -2.94161100 |
| C  | 3.62707100  | 5.25482900  | -5.03408400 |
| H  | 1.92597300  | 6.47744200  | -5.54022800 |
| H  | 5.11900900  | 3.85753900  | -4.33984100 |
| H  | 4.32160900  | 5.82171700  | -5.65202200 |
| C  | 0.87578900  | 3.01386500  | -2.57817600 |
| H  | 1.10812300  | 3.14647300  | -1.50741400 |
| H  | -0.14616900 | 3.39104000  | -2.72077700 |
| C  | 0.88325800  | 1.52406700  | -2.87686800 |
| H  | 1.89836200  | 1.12080900  | -2.69495200 |
| H  | 0.66523400  | 1.36245600  | -3.94658100 |
| O  | -0.07891900 | 0.85499300  | -2.10056400 |
| H  | 0.00911600  | -0.27435700 | -2.10749200 |

|              |             |             |             |
|--------------|-------------|-------------|-------------|
| H            | 0.34887600  | 5.18580000  | -4.13328100 |
| <b>IM-B2</b> |             |             |             |
| N            | -0.04194400 | -1.49083800 | -1.23220300 |
| C            | 2.38519200  | -1.45708200 | -1.38571800 |
| H            | 2.35054000  | -0.92764200 | -2.34517100 |
| H            | 3.30321300  | -2.05095900 | -1.37234500 |
| C            | -2.43561900 | -1.17965000 | -1.48232200 |
| C            | 0.09383500  | 1.82731700  | 0.84961400  |
| O            | 0.11996200  | 2.84979900  | 1.39967300  |
| P            | -2.22701300 | 0.18365900  | -0.25105600 |
| P            | 2.28770500  | -0.16036500 | -0.07361400 |
| C            | 3.02782200  | -0.93373600 | 1.42080100  |
| C            | 2.88788400  | -0.24086700 | 2.62906500  |
| C            | 3.72080700  | -2.14537000 | 1.41877400  |
| C            | 3.43613500  | -0.74187900 | 3.80305100  |
| H            | 2.33368400  | 0.69430400  | 2.65240300  |
| C            | 4.26088700  | -2.65494500 | 2.59760500  |
| H            | 3.84884500  | -2.70990300 | 0.50058300  |
| C            | 4.12314800  | -1.95372500 | 3.79056900  |
| H            | 3.31570600  | -0.19234500 | 4.73162000  |
| H            | 4.79138400  | -3.60249800 | 2.57978600  |
| H            | 4.54485400  | -2.35195600 | 4.70853400  |
| C            | 3.59982000  | 1.05316100  | -0.47784500 |
| C            | 4.73138600  | 0.72264200  | -1.22950500 |
| C            | 3.50482200  | 2.33272800  | 0.07854200  |
| C            | 5.74783100  | 1.65488500  | -1.42002000 |
| H            | 4.82978000  | -0.26592400 | -1.66869500 |
| C            | 4.52668900  | 3.26003500  | -0.10197000 |
| H            | 2.62632700  | 2.61132300  | 0.65199300  |
| C            | 5.65035200  | 2.92240000  | -0.85064100 |
| H            | 6.61915100  | 1.38826900  | -2.01098600 |
| H            | 4.43503900  | 4.25114100  | 0.33088800  |
| H            | 6.44267600  | 3.64941400  | -1.00072800 |
| C            | -3.21492600 | -0.31313900 | 1.20942800  |
| C            | -3.30927200 | 0.61672100  | 2.25262500  |
| C            | -3.81258900 | -1.56397700 | 1.36654600  |
| C            | -3.99902000 | 0.30692500  | 3.41732100  |
| H            | -2.83541500 | 1.59021800  | 2.14978100  |
| C            | -4.49933700 | -1.87817400 | 2.53845900  |
| H            | -3.74623800 | -2.31215600 | 0.58217200  |
| C            | -4.59650900 | -0.94408200 | 3.56333700  |
| H            | -4.06539700 | 1.04060400  | 4.21502800  |
| H            | -4.95787900 | -2.85662000 | 2.64781200  |
| H            | -5.13053200 | -1.18948000 | 4.47648500  |

|              |             |             |             |
|--------------|-------------|-------------|-------------|
| C            | -3.23151600 | 1.54794700  | -0.92942500 |
| C            | -2.61288300 | 2.75603600  | -1.24835000 |
| C            | -4.61018600 | 1.40608000  | -1.11999800 |
| C            | -3.36244000 | 3.81287900  | -1.75855400 |
| H            | -1.54343000 | 2.85015000  | -1.10792000 |
| C            | -5.35645700 | 2.45911000  | -1.63701900 |
| H            | -5.10378200 | 0.47571500  | -0.84948700 |
| C            | -4.73189300 | 3.66416400  | -1.95644500 |
| H            | -2.87328400 | 4.75174900  | -2.00144700 |
| H            | -6.42604900 | 2.34286000  | -1.78499000 |
| H            | -5.31646600 | 4.48801600  | -2.35578700 |
| H            | -3.42784300 | -1.63995400 | -1.46339400 |
| H            | -2.30599200 | -0.70187900 | -2.45935000 |
| C            | 1.14665200  | -2.34453000 | -1.24644700 |
| H            | 1.18288800  | -2.91114300 | -0.30762800 |
| H            | 1.10585000  | -3.06946400 | -2.07319300 |
| C            | -1.32158800 | -2.20484800 | -1.26378600 |
| H            | -1.33412800 | -2.95747200 | -2.06641900 |
| H            | -1.45158500 | -2.73103400 | -0.30999400 |
| Mn           | 0.04056700  | 0.26114700  | 0.01575400  |
| C            | -0.10790300 | -0.64799600 | 1.54234300  |
| O            | -0.23299500 | -1.26500500 | 2.51445900  |
| C            | 1.83646000  | 3.87545900  | -3.37386200 |
| C            | 1.34006400  | 4.80546200  | -4.29064100 |
| C            | 3.20651900  | 3.59494300  | -3.39692300 |
| C            | 2.18448200  | 5.44665000  | -5.19406800 |
| C            | 4.05499400  | 4.23238400  | -4.29548300 |
| H            | 3.61172400  | 2.86847500  | -2.70085600 |
| C            | 3.54755600  | 5.16380100  | -5.19873700 |
| H            | 1.77633200  | 6.16884100  | -5.89607200 |
| H            | 5.11706600  | 4.00109200  | -4.28677400 |
| H            | 4.20844700  | 5.66473600  | -5.90051100 |
| C            | 0.92245700  | 3.15276900  | -2.41671100 |
| H            | 1.25747200  | 3.29218000  | -1.38073500 |
| H            | -0.08813700 | 3.56971900  | -2.48985400 |
| C            | 0.84592500  | 1.64252200  | -2.70833000 |
| H            | 1.88177700  | 1.24885100  | -2.62801000 |
| H            | 0.57133200  | 1.53179600  | -3.77413400 |
| O            | -0.05179500 | 0.95370900  | -1.92427900 |
| H            | -0.00812800 | -0.80644000 | -2.01241000 |
| H            | 0.27562000  | 5.02995600  | -4.29520900 |
| <b>TS-B2</b> |             |             |             |
| N            | -0.02504200 | -1.51955700 | -1.22280400 |
| C            | 2.39025300  | -1.49676700 | -1.44925800 |

|   |             |             |             |
|---|-------------|-------------|-------------|
| H | 2.34034400  | -0.93508900 | -2.39292300 |
| H | 3.31970300  | -2.07982700 | -1.47013400 |
| C | -2.45869200 | -1.30176500 | -1.28870600 |
| C | 0.19995900  | 1.58358000  | 1.15516400  |
| O | 0.26922900  | 2.50826100  | 1.87231100  |
| P | -2.15638000 | 0.15291100  | -0.19962900 |
| P | 2.33863400  | -0.23238700 | -0.10857700 |
| C | 3.09414200  | -1.02460000 | 1.35138200  |
| C | 3.16179800  | -0.25815600 | 2.52333500  |
| C | 3.52968100  | -2.35173000 | 1.38383300  |
| C | 3.66668400  | -0.80415500 | 3.69582800  |
| H | 2.80330800  | 0.77250900  | 2.51366700  |
| C | 4.02804400  | -2.90058200 | 2.56421000  |
| H | 3.48096600  | -2.97287800 | 0.49001000  |
| C | 4.09847700  | -2.12946100 | 3.71951300  |
| H | 3.71253200  | -0.19707800 | 4.59785300  |
| H | 4.35976800  | -3.93733500 | 2.57782400  |
| H | 4.48479200  | -2.56100400 | 4.64102200  |
| C | 3.58372900  | 1.00482600  | -0.59516700 |
| C | 4.91264200  | 0.62305700  | -0.82330800 |
| C | 3.21528000  | 2.34284700  | -0.75583800 |
| C | 5.85056800  | 1.56504800  | -1.22834900 |
| H | 5.21301900  | -0.41523100 | -0.67370400 |
| C | 4.15685900  | 3.28576600  | -1.16199500 |
| H | 2.18410400  | 2.64910600  | -0.57579400 |
| C | 5.47096000  | 2.89587600  | -1.40212500 |
| H | 6.88084800  | 1.26202800  | -1.40793800 |
| H | 3.84959200  | 4.32101000  | -1.29918200 |
| H | 6.20620800  | 3.63132600  | -1.72480400 |
| C | -3.15181400 | -0.17533000 | 1.30409600  |
| C | -3.53723900 | 0.88312500  | 2.13664600  |
| C | -3.44512200 | -1.48343900 | 1.70638600  |
| C | -4.21300500 | 0.63940800  | 3.32712400  |
| H | -3.31492100 | 1.90999300  | 1.84610800  |
| C | -4.12118100 | -1.72721400 | 2.89793400  |
| H | -3.13946300 | -2.32852000 | 1.08965000  |
| C | -4.50977600 | -0.66639100 | 3.71061700  |
| H | -4.51067500 | 1.47575000  | 3.95729600  |
| H | -4.34326400 | -2.75173200 | 3.19155900  |
| H | -5.03848400 | -0.85641700 | 4.64300300  |
| C | -2.97952500 | 1.59150100  | -0.94619700 |
| C | -2.59307700 | 2.87490700  | -0.54294700 |
| C | -3.99714400 | 1.45577900  | -1.89602000 |
| C | -3.20488900 | 4.00135000  | -1.08732300 |

|    |             |             |             |
|----|-------------|-------------|-------------|
| H  | -1.79767000 | 2.99394700  | 0.19334800  |
| C  | -4.60208200 | 2.58162400  | -2.44310300 |
| H  | -4.31365800 | 0.46495600  | -2.21900400 |
| C  | -4.20648800 | 3.85685800  | -2.04259500 |
| H  | -2.88318300 | 4.99359900  | -0.77454500 |
| H  | -5.38537300 | 2.46270800  | -3.18973800 |
| H  | -4.67785300 | 4.73639100  | -2.47752800 |
| H  | -3.41226600 | -1.79884400 | -1.07290900 |
| H  | -2.48092700 | -0.90778700 | -2.31035700 |
| C  | 1.15717400  | -2.37556200 | -1.31068400 |
| H  | 1.21588000  | -2.99058500 | -0.39776800 |
| H  | 1.07433100  | -3.07061200 | -2.16337300 |
| C  | -1.28637600 | -2.26416300 | -1.13766700 |
| H  | -1.32934900 | -3.03824000 | -1.92279500 |
| H  | -1.31851200 | -2.78692200 | -0.16838600 |
| Mn | 0.09983300  | 0.15990700  | 0.11214400  |
| C  | 0.01098900  | -0.87979700 | 1.50006000  |
| O  | -0.05720200 | -1.61951400 | 2.40571000  |
| C  | 0.62810800  | 4.05486000  | -2.84217500 |
| C  | 1.56613900  | 4.56216700  | -3.74790800 |
| C  | 0.51722300  | 4.68678300  | -1.59469300 |
| C  | 2.34436200  | 5.67453200  | -3.43606900 |
| C  | 1.29837700  | 5.79231400  | -1.27188300 |
| H  | -0.20091000 | 4.30060200  | -0.86942200 |
| C  | 2.21063700  | 6.29828200  | -2.19761500 |
| H  | 3.05692000  | 6.05789100  | -4.16555300 |
| H  | 1.18853900  | 6.26638600  | -0.29729900 |
| H  | 2.81339500  | 7.17179900  | -1.95323200 |
| C  | -0.21086300 | 2.85759800  | -3.16070400 |
| H  | -1.27544200 | 3.06544800  | -2.98113200 |
| H  | -0.11770700 | 2.58236800  | -4.22049500 |
| C  | 0.13715900  | 1.59964200  | -2.33140700 |
| H  | 0.10556300  | 1.96309700  | -1.24796000 |
| H  | 1.22652800  | 1.38135700  | -2.50821600 |
| O  | -0.68920300 | 0.55917200  | -2.57380100 |
| H  | -0.11448200 | -0.83664100 | -2.04070400 |
| H  | 1.67480400  | 4.07949000  | -4.71994200 |

### IM-B3

|   |             |             |             |
|---|-------------|-------------|-------------|
| N | -0.86315600 | 0.73743200  | 2.16594500  |
| C | 1.17827000  | 2.01693000  | 2.27824600  |
| H | 1.70985400  | 1.13922600  | 2.67428900  |
| H | 1.68361000  | 2.91620800  | 2.64916800  |
| C | -2.59366400 | -0.93000600 | 2.12923500  |
| C | -0.45633100 | 0.30549900  | -1.65836300 |

|   |             |             |             |
|---|-------------|-------------|-------------|
| O | -0.37013900 | 0.15327500  | -2.82035200 |
| P | -2.47857300 | -0.77952800 | 0.30298200  |
| P | 1.17835100  | 1.84840200  | 0.43761000  |
| C | 1.20662000  | 3.55429000  | -0.22787700 |
| C | 0.62842300  | 3.79065900  | -1.48041000 |
| C | 1.84655900  | 4.60982200  | 0.43111600  |
| C | 0.68328000  | 5.05555400  | -2.05684200 |
| H | 0.12969800  | 2.97375900  | -2.00192800 |
| C | 1.89214200  | 5.87719300  | -0.14062000 |
| H | 2.32554700  | 4.44542500  | 1.39638400  |
| C | 1.31036700  | 6.10201400  | -1.38608400 |
| H | 0.22853200  | 5.22390100  | -3.03119500 |
| H | 2.38832800  | 6.69048300  | 0.38604200  |
| H | 1.34726900  | 7.09368700  | -1.83375600 |
| C | 2.85792600  | 1.26196300  | 0.02641200  |
| C | 3.96712800  | 1.63281300  | 0.79609500  |
| C | 3.04517900  | 0.46182700  | -1.10529200 |
| C | 5.24261000  | 1.20718300  | 0.44103400  |
| H | 3.83587100  | 2.25605100  | 1.68141000  |
| C | 4.32464600  | 0.04848800  | -1.46514700 |
| H | 2.18526800  | 0.14707000  | -1.69784600 |
| C | 5.42239600  | 0.41622100  | -0.69163000 |
| H | 6.09834800  | 1.49379400  | 1.05004700  |
| H | 4.45498800  | -0.58135800 | -2.34256600 |
| H | 6.42128100  | 0.08405600  | -0.96994900 |
| C | -4.08676800 | -0.10306700 | -0.25490900 |
| C | -4.13287300 | 0.60231400  | -1.46362400 |
| C | -5.27747600 | -0.31217700 | 0.44945500  |
| C | -5.34039500 | 1.08530300  | -1.95701900 |
| H | -3.20904100 | 0.78433400  | -2.01399500 |
| C | -6.48292000 | 0.18576800  | -0.03613100 |
| H | -5.27265800 | -0.87477500 | 1.38260900  |
| C | -6.51701600 | 0.88288100  | -1.24120600 |
| H | -5.35817400 | 1.63365000  | -2.89706200 |
| H | -7.40018700 | 0.02266800  | 0.52734300  |
| H | -7.46085800 | 1.27024800  | -1.62036600 |
| C | -2.55508300 | -2.47601500 | -0.36839800 |
| C | -2.65211200 | -2.62186300 | -1.75975200 |
| C | -2.47357700 | -3.62157800 | 0.42893400  |
| C | -2.66466800 | -3.88475300 | -2.33868800 |
| H | -2.70313800 | -1.73668500 | -2.39497000 |
| C | -2.48077000 | -4.88694500 | -0.15514900 |
| H | -2.39349500 | -3.53512400 | 1.51144100  |
| C | -2.57495500 | -5.02110000 | -1.53645100 |

|    |             |             |             |
|----|-------------|-------------|-------------|
| H  | -2.73514300 | -3.98235300 | -3.42039500 |
| H  | -2.41147300 | -5.77041400 | 0.47686100  |
| H  | -2.57552200 | -6.01076000 | -1.98958000 |
| H  | -3.56059700 | -1.28487600 | 2.50405700  |
| H  | -1.81225100 | -1.64309000 | 2.43656500  |
| C  | -0.26911700 | 1.95535300  | 2.73788800  |
| H  | -0.83959700 | 2.83277500  | 2.39931400  |
| H  | -0.32446500 | 1.92543300  | 3.83832100  |
| C  | -2.20372900 | 0.42839600  | 2.68963500  |
| H  | -2.18371600 | 0.40153500  | 3.79107800  |
| H  | -2.90901400 | 1.21724700  | 2.38698400  |
| Mn | -0.67164700 | 0.58216700  | 0.07221500  |
| C  | -1.66310000 | 2.00454800  | -0.17367600 |
| O  | -2.31962100 | 2.97081100  | -0.27746300 |
| C  | 1.74509000  | -3.00818600 | -0.47617200 |
| C  | 3.10111300  | -3.31819100 | -0.62689700 |
| C  | 0.99979500  | -2.72772500 | -1.62609500 |
| C  | 3.68877100  | -3.36443700 | -1.88762700 |
| C  | 1.58393200  | -2.75920500 | -2.88880000 |
| H  | -0.05773500 | -2.48710800 | -1.52105400 |
| C  | 2.93255600  | -3.08315300 | -3.02421900 |
| H  | 4.74446700  | -3.61753700 | -1.98384600 |
| H  | 0.98097000  | -2.53103500 | -3.76690800 |
| H  | 3.39152200  | -3.12132300 | -4.01148200 |
| C  | 1.11732600  | -2.91311100 | 0.87658000  |
| H  | 0.09223500  | -3.30735300 | 0.87064800  |
| H  | 1.68225700  | -3.50528700 | 1.60946400  |
| C  | 1.08041900  | -1.47741500 | 1.44420000  |
| H  | 0.39492700  | -0.88541900 | 0.61114800  |
| H  | 2.06923000  | -0.98767600 | 1.24239900  |
| O  | 0.61209200  | -1.35826100 | 2.65744600  |
| H  | -0.24480600 | -0.07581100 | 2.48947800  |
| H  | 3.69867800  | -3.53175700 | 0.26045000  |

### TS-B3

|   |             |             |             |
|---|-------------|-------------|-------------|
| N | -0.72348200 | 0.68607800  | 2.16131900  |
| C | 1.36460900  | 1.90410400  | 2.24060300  |
| H | 1.91856400  | 0.98777200  | 2.48900600  |
| H | 1.93112100  | 2.74895200  | 2.65165300  |
| C | -2.59440700 | -0.83152500 | 2.04908300  |
| C | -0.47858000 | 0.62838300  | -1.72357100 |
| O | -0.34796500 | 0.53940700  | -2.88963700 |
| P | -2.46660100 | -0.59734200 | 0.22308100  |
| P | 1.20977200  | 1.94290200  | 0.39791100  |
| C | 1.14108600  | 3.71982600  | -0.02952900 |

|   |             |             |             |
|---|-------------|-------------|-------------|
| C | 1.21393000  | 4.07031600  | -1.38508800 |
| C | 0.92673200  | 4.72732400  | 0.91482700  |
| C | 1.08887400  | 5.39624100  | -1.78003600 |
| H | 1.36968500  | 3.29407900  | -2.13593800 |
| C | 0.79819700  | 6.05620000  | 0.51753100  |
| H | 0.85232900  | 4.48453900  | 1.97433500  |
| C | 0.88021400  | 6.39397100  | -0.82894900 |
| H | 1.15050600  | 5.65262400  | -2.83623700 |
| H | 0.63210700  | 6.82874900  | 1.26637400  |
| H | 0.77838500  | 7.43228100  | -1.13956100 |
| C | 2.87062500  | 1.48339200  | -0.20123300 |
| C | 4.00617500  | 2.19473200  | 0.20947000  |
| C | 3.01377100  | 0.41599200  | -1.08929400 |
| C | 5.26564000  | 1.82567900  | -0.24773900 |
| H | 3.90010200  | 3.04782500  | 0.88129300  |
| C | 4.27652700  | 0.04960000  | -1.55111400 |
| H | 2.12902700  | -0.13176700 | -1.41190000 |
| C | 5.40096400  | 0.75165400  | -1.12772300 |
| H | 6.14459600  | 2.38073300  | 0.07623800  |
| H | 4.36999700  | -0.78818100 | -2.24015600 |
| H | 6.38874200  | 0.46559400  | -1.48610800 |
| C | -4.10713800 | 0.03629400  | -0.30159400 |
| C | -4.17494500 | 0.95033100  | -1.35796900 |
| C | -5.29945600 | -0.42174800 | 0.27258600  |
| C | -5.40537100 | 1.41226600  | -1.81673600 |
| H | -3.25310500 | 1.30123200  | -1.82094100 |
| C | -6.52839700 | 0.04751500  | -0.17853800 |
| H | -5.27385900 | -1.16265700 | 1.07236300  |
| C | -6.58306100 | 0.96841800  | -1.22284700 |
| H | -5.44123900 | 2.12570800  | -2.63797900 |
| H | -7.44730800 | -0.31166100 | 0.28221700  |
| H | -7.54516400 | 1.33559800  | -1.57584600 |
| C | -2.54165200 | -2.29023000 | -0.46393100 |
| C | -2.26606700 | -2.44875100 | -1.82777500 |
| C | -2.85185200 | -3.42098800 | 0.29956400  |
| C | -2.27885300 | -3.71109100 | -2.41064400 |
| H | -2.02081200 | -1.57433800 | -2.43249300 |
| C | -2.86231500 | -4.68517100 | -0.28525500 |
| H | -3.07446500 | -3.32445100 | 1.36158400  |
| C | -2.57043300 | -4.83319800 | -1.63828700 |
| H | -2.04482900 | -3.81967200 | -3.46833200 |
| H | -3.09569000 | -5.55787300 | 0.32228500  |
| H | -2.56887100 | -5.82319500 | -2.09089900 |
| H | -3.60041300 | -1.08598100 | 2.40315300  |

|           |             |             |             |
|-----------|-------------|-------------|-------------|
| H         | -1.91443800 | -1.65634500 | 2.30839800  |
| C         | -0.03851800 | 1.81195800  | 2.81477600  |
| H         | -0.61740700 | 2.72639900  | 2.61718000  |
| H         | -0.01124700 | 1.66498700  | 3.90722100  |
| C         | -2.07131400 | 0.43694200  | 2.69671000  |
| H         | -2.03817400 | 0.33201100  | 3.79374000  |
| H         | -2.70496500 | 1.30451500  | 2.46181100  |
| Mn        | -0.65961800 | 0.74312500  | 0.02089500  |
| C         | -1.61174700 | 2.23420500  | -0.01797200 |
| O         | -2.21246400 | 3.24165300  | -0.00541100 |
| C         | 1.72049000  | -3.04617000 | -0.95347900 |
| C         | 2.97168400  | -3.67001400 | -0.98142300 |
| C         | 1.25721300  | -2.43943000 | -2.12564200 |
| C         | 3.73145700  | -3.70599800 | -2.14782400 |
| C         | 2.01789300  | -2.45856400 | -3.29139000 |
| H         | 0.29267200  | -1.93476000 | -2.11232800 |
| C         | 3.25502500  | -3.10123700 | -3.30905800 |
| H         | 4.69773400  | -4.20892600 | -2.15019300 |
| H         | 1.63810300  | -1.96894900 | -4.18756300 |
| H         | 3.84582700  | -3.12847100 | -4.22363000 |
| C         | 0.91984900  | -3.00572400 | 0.31142400  |
| H         | -0.14931900 | -3.15524900 | 0.12084900  |
| H         | 1.22848300  | -3.82765900 | 0.97452700  |
| C         | 1.10234800  | -1.74270100 | 1.15715900  |
| H         | 0.29389100  | -0.69708100 | 0.18550400  |
| H         | 2.04058200  | -1.18225400 | 0.92923200  |
| O         | 0.61285400  | -1.69788600 | 2.30856700  |
| H         | -0.16531600 | -0.16736100 | 2.36370200  |
| H         | 3.34862700  | -4.14386100 | -0.07387100 |
| <b>2b</b> |             |             |             |
| C         | 0.28701200  | -0.09480400 | -0.35196500 |
| C         | -0.28625900 | 1.12947700  | 0.00251700  |
| C         | -0.53470700 | -1.22408500 | -0.42693800 |
| C         | -1.65026300 | 1.22715200  | 0.25915900  |
| C         | -1.89822800 | -1.13006400 | -0.16581600 |
| H         | -0.10070800 | -2.18546600 | -0.70575300 |
| C         | -2.46016900 | 0.09710400  | 0.17671400  |
| H         | -2.08232600 | 2.19017100  | 0.52608700  |
| H         | -2.52457300 | -2.01778700 | -0.23443400 |
| H         | -3.52737100 | 0.17278100  | 0.37697100  |
| C         | 1.76839300  | -0.20729900 | -0.57754600 |
| H         | 1.97300300  | -0.91536800 | -1.39611700 |
| H         | 2.22594000  | 0.74994000  | -0.85012100 |
| C         | 2.47830600  | -0.74405000 | 0.64741300  |

|                         |             |             |             |
|-------------------------|-------------|-------------|-------------|
| H                       | 1.97018300  | -1.62758700 | 1.11336600  |
| O                       | 3.49584800  | -0.28999500 | 1.11115200  |
| H                       | 0.34612900  | 2.01462100  | 0.07090700  |
| <b><sup>t</sup>BuO-</b> |             |             |             |
| O                       | 1.42050600  | -0.87614900 | -0.40097100 |
| C                       | 2.70029500  | -1.09519700 | -0.19443100 |
| C                       | 3.62017400  | -0.16766100 | -1.06453300 |
| C                       | 3.12143100  | -0.85043500 | 1.29781200  |
| C                       | 3.12206200  | -2.56839700 | -0.53077700 |
| H                       | 3.38248200  | -0.32979000 | -2.12726200 |
| H                       | 3.38028000  | 0.88246700  | -0.83714700 |
| H                       | 4.71170400  | -0.30799300 | -0.93098400 |
| H                       | 2.51870200  | -1.50435200 | 1.94667800  |
| H                       | 4.19089100  | -1.02336300 | 1.53297100  |
| H                       | 2.87573000  | 0.18780200  | 1.56890000  |
| H                       | 4.19196600  | -2.81278900 | -0.37427000 |
| H                       | 2.52062700  | -3.25641900 | 0.08308700  |
| H                       | 2.87464300  | -2.77495000 | -1.58331700 |
| <b>IM-C1</b>            |             |             |             |
| O                       | 2.64350600  | -1.08579500 | 2.09387700  |
| C                       | 0.82738300  | -2.10693000 | 0.89991400  |
| C                       | 0.43812800  | -0.97670400 | 0.09746600  |
| C                       | 0.12534400  | -3.32544000 | 0.77123200  |
| C                       | -0.66173800 | -1.15376600 | -0.80119900 |
| C                       | -0.92853000 | -3.47383600 | -0.10033200 |
| H                       | 0.45282100  | -4.16059200 | 1.39755000  |
| C                       | -1.31043500 | -2.35964800 | -0.88638700 |
| H                       | -0.93676300 | -0.27822800 | -1.39465800 |
| H                       | -1.45783800 | -4.42186000 | -0.18689100 |
| H                       | -2.14568700 | -2.46171600 | -1.58215200 |
| C                       | 1.91343400  | -2.04685300 | 1.83599300  |
| H                       | 2.08116800  | -3.02102300 | 2.37542300  |
| N                       | 1.04011500  | 0.21017700  | 0.14282900  |
| H                       | 0.62621900  | 1.03187400  | -0.50173300 |
| H                       | 1.80692200  | 0.29200300  | 0.80096400  |
| O                       | -0.10303100 | 1.88944700  | -1.43727600 |
| C                       | -0.81898200 | 2.86647000  | -0.81484600 |
| C                       | 0.10867900  | 3.82470700  | -0.03009900 |
| C                       | -1.58078700 | 3.69693700  | -1.86800100 |
| C                       | -1.85438500 | 2.28752700  | 0.17810600  |
| H                       | 0.64057600  | 3.26932400  | 0.75596800  |
| H                       | 0.86534100  | 4.23662000  | -0.71205700 |
| H                       | -0.41961900 | 4.66609700  | 0.45092400  |
| H                       | -2.25072100 | 3.03749000  | -2.43671600 |

|                         |             |             |             |
|-------------------------|-------------|-------------|-------------|
| H                       | -2.18217000 | 4.51544600  | -1.43663400 |
| H                       | -0.86514200 | 4.13016500  | -2.58018000 |
| H                       | -2.44874900 | 3.05896100  | 0.69785000  |
| H                       | -2.54919400 | 1.62429500  | -0.35639700 |
| H                       | -1.34467600 | 1.68081300  | 0.93959600  |
| <b>TS-C1</b>            |             |             |             |
| O                       | 1.75272400  | 1.32505200  | 1.75307600  |
| C                       | -0.06165300 | 0.29365100  | 0.56496100  |
| C                       | -0.45761500 | 1.42082600  | -0.23964500 |
| C                       | -0.75822700 | -0.92851300 | 0.44057300  |
| C                       | -1.55877500 | 1.23475500  | -1.13574100 |
| C                       | -1.81301800 | -1.08461400 | -0.42847900 |
| H                       | -0.42547200 | -1.76053400 | 1.06837600  |
| C                       | -2.20175300 | 0.02573200  | -1.21680900 |
| H                       | -1.83946400 | 2.10615000  | -1.73215400 |
| H                       | -2.33776700 | -2.03547000 | -0.51166300 |
| H                       | -3.03756000 | -0.08222300 | -1.91107500 |
| C                       | 1.02594100  | 0.36049100  | 1.49856100  |
| H                       | 1.19878800  | -0.61190200 | 2.03976000  |
| N                       | 0.13741200  | 2.61084800  | -0.19922400 |
| H                       | -0.28310600 | 3.43470900  | -0.85351100 |
| H                       | 0.90635500  | 2.69468900  | 0.45655800  |
| O                       | -0.99854500 | 4.28134400  | -1.77735700 |
| C                       | -1.71449300 | 5.25820400  | -1.15198400 |
| C                       | -0.78616300 | 6.21353800  | -0.36528800 |
| C                       | -2.47417200 | 6.09008200  | -2.20462100 |
| C                       | -2.75036500 | 4.67712300  | -0.16145000 |
| H                       | -0.25501000 | 5.65639000  | 0.41988500  |
| H                       | -0.02911400 | 6.62651500  | -1.04611100 |
| H                       | -1.31444100 | 7.05406100  | 0.11704700  |
| H                       | -3.14412900 | 5.43214900  | -2.77495900 |
| H                       | -3.07512400 | 6.90807600  | -1.77196200 |
| H                       | -1.75766100 | 6.52414000  | -2.91536300 |
| H                       | -3.34447200 | 5.44810200  | 0.35905000  |
| H                       | -3.44512100 | 4.01545700  | -0.69784800 |
| H                       | -2.24164800 | 4.06879300  | 0.59926300  |
| <b><sup>t</sup>BuOH</b> |             |             |             |
| H                       | 1.15470900  | -0.01316800 | -0.17619500 |
| O                       | 1.38104900  | -0.92704900 | -0.40005100 |
| C                       | 2.78473700  | -1.08136900 | -0.15748500 |
| C                       | 3.57045600  | -0.12574800 | -1.04992900 |
| C                       | 3.08724600  | -0.81659200 | 1.31404400  |
| C                       | 3.08383600  | -2.52617500 | -0.51774300 |
| H                       | 3.32389000  | -0.29649400 | -2.10387000 |

|   |            |             |             |
|---|------------|-------------|-------------|
| H | 3.33227900 | 0.92005400  | -0.81131200 |
| H | 4.65315400 | -0.25156100 | -0.92336000 |
| H | 2.48896700 | -1.47625100 | 1.95249000  |
| H | 4.14746400 | -0.98093900 | 1.54499700  |
| H | 2.85083000 | 0.22197800  | 1.58382900  |
| H | 4.14471200 | -2.75712400 | -0.36725300 |
| H | 2.48866600 | -3.20507900 | 0.10291600  |
| H | 2.83152200 | -2.71822700 | -1.56639800 |

**IM-C2**

|   |             |             |             |
|---|-------------|-------------|-------------|
| O | 2.32137600  | 1.17552500  | 1.04958100  |
| C | 0.17684900  | 0.20605600  | 0.52456500  |
| C | -0.32260100 | 1.22746300  | -0.41019300 |
| C | -0.61433200 | -0.92354000 | 0.83317700  |
| C | -1.64550700 | 0.94746600  | -0.94470700 |
| C | -1.86261200 | -1.13692200 | 0.29570000  |
| H | -0.18884500 | -1.64920600 | 1.53682100  |
| C | -2.36770100 | -0.16382000 | -0.61299000 |
| H | -2.03943300 | 1.68865000  | -1.64228300 |
| H | -2.44981600 | -2.01842100 | 0.55260800  |
| H | -3.35779500 | -0.31139300 | -1.05451900 |
| C | 1.45401800  | 0.29499800  | 1.15511200  |
| H | 1.65977400  | -0.58381800 | 1.83730000  |
| N | 0.29002600  | 2.32270000  | -0.79164100 |
| H | 1.19520700  | 2.33784100  | -0.31275800 |

**TS-C2**

|   |             |             |             |
|---|-------------|-------------|-------------|
| O | 2.30497800  | -3.25760000 | -1.44459200 |
| C | 0.93896000  | -1.98789100 | -2.96462600 |
| C | 0.49810000  | -0.93989600 | -2.05712400 |
| C | 0.52029800  | -1.97987000 | -4.31010300 |
| C | -0.37476000 | 0.04909000  | -2.63601900 |
| C | -0.31591300 | -1.01345000 | -4.82463800 |
| H | 0.88829000  | -2.78864200 | -4.95004000 |
| C | -0.76116700 | 0.00701800  | -3.95174800 |
| H | -0.72212700 | 0.85117700  | -1.98434500 |
| H | -0.62502300 | -1.02826100 | -5.86857200 |
| H | -1.42608500 | 0.78479300  | -4.33419700 |
| C | 1.80511400  | -3.05663200 | -2.55365900 |
| H | 2.02681100  | -3.77928300 | -3.39118200 |
| N | 0.84628100  | -0.83178900 | -0.78445400 |
| H | 1.38001300  | -1.64206200 | -0.46761000 |
| C | -0.46362900 | 1.85976400  | 2.01516800  |
| C | -1.02303300 | 3.12055100  | 1.78191500  |
| C | -0.59289100 | 1.30971300  | 3.30008200  |
| C | -1.67774800 | 3.82041500  | 2.79370100  |

|   |             |             |             |
|---|-------------|-------------|-------------|
| C | -1.24953300 | 2.00354400  | 4.30975000  |
| H | -0.19427300 | 0.31052700  | 3.46651000  |
| C | -1.79204600 | 3.26542000  | 4.06551000  |
| H | -2.10082100 | 4.80409500  | 2.58657700  |
| H | -1.34306200 | 1.55507400  | 5.29945500  |
| H | -2.30199100 | 3.81007100  | 4.86021100  |
| C | 0.24302800  | 1.09779000  | 0.93308300  |
| H | 0.26855000  | 1.67923900  | 0.00158300  |
| H | 1.28473000  | 0.90809800  | 1.22152300  |
| C | -0.39211300 | -0.28476400 | 0.68695800  |
| H | -1.25285500 | -0.23211900 | -0.02709900 |
| O | -0.35629900 | -1.14652200 | 1.57392000  |
| H | -0.93630600 | 3.55928700  | 0.78623300  |

### IM-C3

|   |             |             |             |
|---|-------------|-------------|-------------|
| O | 2.27808800  | -3.33194200 | -1.53097600 |
| C | 0.94210100  | -1.99753400 | -3.01889500 |
| C | 0.41967900  | -1.04378200 | -2.06669300 |
| C | 0.58552200  | -1.90108900 | -4.37677700 |
| C | -0.44967000 | -0.03413700 | -2.59196400 |
| C | -0.26052600 | -0.92222300 | -4.85234600 |
| H | 1.00974900  | -2.64525500 | -5.05724600 |
| C | -0.77370100 | 0.01119400  | -3.92794200 |
| H | -0.85537200 | 0.70427500  | -1.90446100 |
| H | -0.52374000 | -0.86521200 | -5.90706500 |
| H | -1.44327500 | 0.79866000  | -4.27887900 |
| C | 1.83201400  | -3.06607700 | -2.64666800 |
| H | 2.12725500  | -3.70803100 | -3.52385000 |
| N | 0.72652900  | -1.07152800 | -0.76989100 |
| H | 1.26304200  | -1.87894600 | -0.45980600 |
| C | -0.17669300 | 1.76015000  | 1.70943700  |
| C | -0.77554500 | 2.99434400  | 1.43207600  |
| C | -0.28626400 | 1.25358100  | 3.01571100  |
| C | -1.44455500 | 3.71500500  | 2.42003400  |
| C | -0.95911300 | 1.96800200  | 4.00001700  |
| H | 0.12736300  | 0.26387300  | 3.20069100  |
| C | -1.53574000 | 3.20637200  | 3.71320300  |
| H | -1.89590600 | 4.67844300  | 2.17783200  |
| H | -1.03908800 | 1.55410900  | 5.00641100  |
| H | -2.05391800 | 3.76827200  | 4.49107500  |
| C | 0.52610800  | 0.96783700  | 0.65843700  |
| H | 0.55292600  | 1.52949000  | -0.28970800 |
| H | 1.56788100  | 0.77703600  | 0.95243500  |
| C | -0.10931000 | -0.45792700 | 0.46246400  |
| H | -1.12335000 | -0.29509400 | -0.02126700 |

|              |             |             |             |
|--------------|-------------|-------------|-------------|
| O            | -0.04119700 | -1.24646400 | 1.46208300  |
| H            | -0.70764300 | 3.39634500  | 0.41869100  |
| <b>TS-C3</b> |             |             |             |
| O            | 2.48286300  | -3.28435400 | -1.77790200 |
| C            | 0.90399500  | -1.84835800 | -2.91537900 |
| C            | 0.28930600  | -1.16183300 | -1.80189800 |
| C            | 0.56525000  | -1.49621600 | -4.23075400 |
| C            | -0.60553100 | -0.09851700 | -2.15089800 |
| C            | -0.32954500 | -0.48685800 | -4.53395300 |
| H            | 1.05948600  | -2.05029000 | -5.03361600 |
| C            | -0.90427800 | 0.21185300  | -3.46251800 |
| H            | -1.09496500 | 0.46348800  | -1.35965400 |
| H            | -0.57121200 | -0.23448900 | -5.56483300 |
| H            | -1.61128500 | 1.01988500  | -3.66090200 |
| C            | 1.94865900  | -2.85316000 | -2.78571300 |
| H            | 2.28510500  | -3.22656800 | -3.79749200 |
| N            | 0.55822500  | -1.51683500 | -0.53283500 |
| H            | 0.63694100  | -2.66956400 | -0.22085100 |
| C            | -0.18385000 | 1.51695300  | 1.63318400  |
| C            | -0.69689400 | 2.71279000  | 1.11953300  |
| C            | -0.45098200 | 1.20691000  | 2.97446800  |
| C            | -1.44436200 | 3.58056600  | 1.91287700  |
| C            | -1.19894400 | 2.07005200  | 3.76805300  |
| H            | -0.08050400 | 0.26259400  | 3.36784300  |
| C            | -1.69733900 | 3.26258800  | 3.24411200  |
| H            | -1.83112300 | 4.50746000  | 1.48853800  |
| H            | -1.39863900 | 1.80909800  | 4.80764600  |
| H            | -2.28291700 | 3.93659000  | 3.86930600  |
| C            | 0.59992200  | 0.58150400  | 0.76169100  |
| H            | 0.77239000  | 1.04649200  | -0.21768200 |
| H            | 1.58569100  | 0.36786200  | 1.19593500  |
| C            | -0.06947900 | -0.79208600 | 0.56577600  |
| H            | -1.15200700 | -0.62823400 | 0.34884100  |
| O            | 0.06663200  | -1.50655400 | 1.75785600  |
| H            | -0.50124300 | 2.96272500  | 0.07496700  |
| H            | 0.11214800  | -2.48281800 | 1.50034900  |
| O            | 0.39458200  | -3.76680300 | 0.51868700  |
| C            | -0.73256800 | -4.46528300 | 0.10650000  |
| C            | -0.52365400 | -5.01593300 | -1.31085000 |
| C            | -0.94406800 | -5.63596800 | 1.07491200  |
| C            | -1.99115600 | -3.57756200 | 0.11629500  |
| H            | -0.42969700 | -4.19036200 | -2.02972800 |
| H            | 0.40853500  | -5.59289400 | -1.34915900 |
| H            | -1.35513300 | -5.65875400 | -1.64081900 |

|   |             |             |             |
|---|-------------|-------------|-------------|
| H | -1.09377500 | -5.25525400 | 2.09409300  |
| H | -1.81319400 | -6.25732600 | 0.80713000  |
| H | -0.05033900 | -6.27257700 | 1.08682500  |
| H | -2.90168500 | -4.13691600 | -0.14921700 |
| H | -2.13630600 | -3.13475700 | 1.11115300  |
| H | -1.88608800 | -2.75264400 | -0.60169400 |

**IM-C4**

|   |             |             |             |
|---|-------------|-------------|-------------|
| O | 1.17345000  | -3.56601200 | -2.18127100 |
| C | 0.48708500  | -1.51057700 | -3.26540000 |
| C | -0.10894900 | -0.78529900 | -2.14554400 |
| C | 0.53978900  | -0.92352000 | -4.54539900 |
| C | -0.59546700 | 0.53950200  | -2.47963000 |
| C | 0.04910100  | 0.33496000  | -4.81852900 |
| H | 0.99971200  | -1.51640000 | -5.34228100 |
| C | -0.52472800 | 1.05727800  | -3.74907400 |
| H | -1.04945700 | 1.14235400  | -1.69489400 |
| H | 0.10709500  | 0.76393700  | -5.81766200 |
| H | -0.92084200 | 2.05946700  | -3.93248200 |
| C | 1.06354700  | -2.81879700 | -3.15934000 |
| H | 1.47006400  | -3.18035200 | -4.14576800 |
| N | -0.17251000 | -1.34421600 | -0.95276500 |
| H | 0.58031500  | -3.29663900 | -0.30614400 |
| C | -0.23858700 | 1.36424200  | 1.69264500  |
| C | -0.51618000 | 2.69455700  | 1.35399100  |
| C | -0.53685000 | 0.94513200  | 2.99674800  |
| C | -1.05796800 | 3.58164500  | 2.28034300  |
| C | -1.07682000 | 1.82840000  | 3.92565800  |
| H | -0.35680700 | -0.09534900 | 3.25997600  |
| C | -1.33812100 | 3.15294300  | 3.57495800  |
| H | -1.25917400 | 4.61347700  | 1.99050000  |
| H | -1.29819000 | 1.48039000  | 4.93519700  |
| H | -1.75832100 | 3.84408100  | 4.30550000  |
| C | 0.31077000  | 0.41905300  | 0.67338000  |
| H | 0.72490200  | 0.98326600  | -0.17430700 |
| H | 1.12683700  | -0.18821900 | 1.08898700  |
| C | -0.73333300 | -0.59422200 | 0.12617400  |
| H | -1.64970200 | -0.03024400 | -0.14724700 |
| O | -1.13239900 | -1.46878900 | 1.16698700  |
| H | -0.29251500 | 3.03507700  | 0.34104700  |
| H | -0.54289800 | -2.25370600 | 1.06918200  |
| O | 0.41586200  | -3.73203200 | 0.56804800  |
| C | -0.51817600 | -4.79049500 | 0.34378300  |
| C | 0.21488400  | -5.97910100 | -0.27510700 |
| C | -1.05803700 | -5.14913100 | 1.72177300  |

|   |             |             |             |
|---|-------------|-------------|-------------|
| C | -1.65015800 | -4.32147600 | -0.56630900 |
| H | 0.65829700  | -5.68264400 | -1.23186900 |
| H | 1.02276300  | -6.31396900 | 0.38855400  |
| H | -0.46567600 | -6.82637700 | -0.44551800 |
| H | -1.59152400 | -4.29479600 | 2.15699500  |
| H | -1.75122600 | -5.99908300 | 1.66689000  |
| H | -0.23459300 | -5.41677800 | 2.39606200  |
| H | -2.40164500 | -5.11352800 | -0.69877100 |
| H | -2.13193900 | -3.43307500 | -0.14176300 |
| H | -1.25461200 | -4.03964600 | -1.54841200 |

**IM-C5**

|   |             |             |             |
|---|-------------|-------------|-------------|
| O | 1.87500900  | -2.53874400 | -3.15940300 |
| C | 0.39037700  | -0.85023400 | -4.07184400 |
| C | -0.17583600 | -0.27098000 | -2.86101900 |
| C | -0.01946200 | -0.38786800 | -5.33238600 |
| C | -1.16918300 | 0.75384400  | -3.08918100 |
| C | -0.96768400 | 0.60373000  | -5.50680100 |
| H | 0.44523000  | -0.85838300 | -6.20490200 |
| C | -1.54293900 | 1.16112400  | -4.34989700 |
| H | -1.65121600 | 1.21283700  | -2.22649400 |
| H | -1.26270800 | 0.94028300  | -6.49955400 |
| H | -2.30433300 | 1.93907900  | -4.44984000 |
| C | 1.36596300  | -1.92063900 | -4.08518500 |
| H | 1.65734200  | -2.18584300 | -5.14745700 |
| N | 0.22508000  | -0.69017000 | -1.67228000 |
| H | 1.21080400  | -0.84641100 | 1.82096000  |
| C | -0.54120300 | 1.90080800  | 1.00062100  |
| C | -1.73425100 | 2.58654800  | 0.73217300  |
| C | -0.11093300 | 1.82822800  | 2.33061200  |
| C | -2.46941600 | 3.18526300  | 1.75012500  |
| C | -0.84282000 | 2.42993100  | 3.35105700  |
| H | 0.79629400  | 1.27019200  | 2.56738700  |
| C | -2.02360300 | 3.11308500  | 3.06841100  |
| H | -3.39175000 | 3.71632100  | 1.51287100  |
| H | -0.48602100 | 2.36232400  | 4.37958400  |
| H | -2.59266700 | 3.58572500  | 3.86882000  |
| C | 0.20343900  | 1.23515800  | -0.11396300 |
| H | 0.16644100  | 1.86434200  | -1.01496600 |
| H | 1.26211500  | 1.08888700  | 0.13700700  |
| C | -0.36610100 | -0.14567400 | -0.51235900 |
| H | -1.47625000 | -0.06196700 | -0.55048500 |
| O | -0.06739700 | -1.09145100 | 0.54825900  |
| H | -2.08055800 | 2.65444800  | -0.30124000 |
| H | 0.38681300  | -1.77615300 | 0.01686800  |

|   |             |             |            |
|---|-------------|-------------|------------|
| O | 1.83484500  | -0.87271400 | 2.58520800 |
| C | 1.27915900  | -1.78264800 | 3.52620700 |
| C | 1.16739000  | -3.17424100 | 2.90284300 |
| C | 2.25321000  | -1.80303600 | 4.69515200 |
| C | -0.09884100 | -1.30355100 | 3.97935800 |
| H | 0.44274300  | -3.16799200 | 2.07956100 |
| H | 2.13814800  | -3.49092100 | 2.50322900 |
| H | 0.83319200  | -3.92119100 | 3.63664200 |
| H | 2.36103000  | -0.79636100 | 5.11699900 |
| H | 1.90725900  | -2.47749200 | 5.48913600 |
| H | 3.24345500  | -2.13600300 | 4.36151700 |
| H | -0.55076700 | -1.99890700 | 4.70102300 |
| H | -0.02772900 | -0.31547800 | 4.45071100 |
| H | -0.76900800 | -1.21555200 | 3.11542300 |

**TS-C4**

|   |             |             |             |
|---|-------------|-------------|-------------|
| O | 3.18582000  | -2.62308200 | -5.32577800 |
| C | 1.41991600  | -1.70308100 | -6.68853500 |
| C | 1.04782200  | -0.58320300 | -5.88987900 |
| C | 0.67989000  | -2.01835300 | -7.83747000 |
| C | -0.10493600 | 0.13344400  | -6.28271200 |
| C | -0.43812500 | -1.29125100 | -8.21157100 |
| H | 1.00106900  | -2.87996200 | -8.42833800 |
| C | -0.82909100 | -0.21059700 | -7.41191500 |
| H | -0.39477300 | 0.99213300  | -5.67671000 |
| H | -1.00309500 | -1.55530200 | -9.10389700 |
| H | -1.71001800 | 0.37296700  | -7.68233700 |
| C | 2.51951600  | -2.59971000 | -6.34426100 |
| H | 2.71528500  | -3.35721100 | -7.15597000 |
| N | 1.82274700  | -0.14509200 | -4.85277900 |
| H | 2.07846600  | -1.81034000 | -1.62236400 |
| C | 1.06920100  | 1.42878100  | -1.63812900 |
| C | 0.30280900  | 2.54863500  | -1.97994800 |
| C | 0.88999800  | 0.84417000  | -0.38009500 |
| C | -0.61991500 | 3.08430300  | -1.08503100 |
| C | -0.03412700 | 1.38131300  | 0.51342000  |
| H | 1.49110300  | -0.04322600 | -0.13985200 |
| C | -0.79081600 | 2.49986000  | 0.16864400  |
| H | -1.20728100 | 3.95919500  | -1.36603500 |
| H | -0.16698400 | 0.91627300  | 1.49133400  |
| H | -1.51301600 | 2.91570800  | 0.87202900  |
| C | 2.02418700  | 0.82233200  | -2.62970700 |
| H | 2.59628700  | 1.60728900  | -3.14697700 |
| H | 2.74487900  | 0.17839800  | -2.11363800 |
| C | 1.29592700  | 0.02379200  | -3.68207400 |

|                       |             |             |             |
|-----------------------|-------------|-------------|-------------|
| H                     | 0.22872000  | -0.16127800 | -3.50293700 |
| O                     | 1.43931100  | -1.95230200 | -2.64127900 |
| H                     | 0.43414100  | 3.00417800  | -2.96457500 |
| H                     | 2.09880800  | -2.21924800 | -3.30235900 |
| O                     | 2.69847300  | -1.66766400 | -0.56940400 |
| C                     | 2.42448600  | -2.77106600 | 0.22299400  |
| C                     | 2.88565100  | -4.05711200 | -0.48411300 |
| C                     | 3.17799400  | -2.61605400 | 1.54709100  |
| C                     | 0.91490900  | -2.88281100 | 0.50535300  |
| H                     | 2.35191800  | -4.15128000 | -1.43859800 |
| H                     | 3.95969600  | -3.99532400 | -0.70482700 |
| H                     | 2.70425100  | -4.96640300 | 0.11154300  |
| H                     | 2.85423600  | -1.69670900 | 2.05460000  |
| H                     | 3.01448500  | -3.46391000 | 2.23125300  |
| H                     | 4.25558600  | -2.52687500 | 1.35596500  |
| H                     | 0.65326600  | -3.77796400 | 1.09284000  |
| H                     | 0.56618000  | -2.00032500 | 1.06070400  |
| H                     | 0.37198500  | -2.91538400 | -0.44764300 |
| <b>H<sub>2</sub>O</b> |             |             |             |
| O                     | -1.04838706 | -0.17473118 | 0.00000000  |
| H                     | -0.08838706 | -0.17473118 | 0.00000000  |
| H                     | -1.36884165 | 0.73020465  | 0.00000000  |
| <b>IM-C6</b>          |             |             |             |
| O                     | 3.85245300  | -2.16000500 | -5.90989600 |
| C                     | 1.68574900  | -1.65560200 | -6.88577000 |
| C                     | 1.13456000  | -0.70829700 | -5.94686500 |
| C                     | 0.93717500  | -2.04049000 | -8.01100900 |
| C                     | -0.16436700 | -0.20156800 | -6.27069400 |
| C                     | -0.32708200 | -1.54945700 | -8.27833300 |
| H                     | 1.39746900  | -2.76343300 | -8.69066500 |
| C                     | -0.86618500 | -0.60898400 | -7.38508600 |
| H                     | -0.58581400 | 0.57051300  | -5.62903400 |
| H                     | -0.87973700 | -1.86401100 | -9.16223400 |
| H                     | -1.84916700 | -0.17626800 | -7.58316100 |
| C                     | 2.99445500  | -2.28311900 | -6.76857000 |
| H                     | 3.18502500  | -2.98007900 | -7.63845100 |
| N                     | 1.84673700  | -0.29636400 | -4.87921800 |
| C                     | 1.18435200  | 1.51542700  | -1.66492200 |
| C                     | -0.18173900 | 1.32879900  | -1.33753200 |
| C                     | 1.93714400  | 2.30330200  | -0.76170400 |
| C                     | -0.74326000 | 1.90097100  | -0.20649700 |
| C                     | 1.37170000  | 2.87140100  | 0.36992500  |
| H                     | 2.99703800  | 2.45707100  | -0.97256500 |
| C                     | 0.02059500  | 2.68290500  | 0.66289100  |

|   |             |             |             |
|---|-------------|-------------|-------------|
| H | -1.79985900 | 1.72890800  | 0.00573700  |
| H | 1.99515200  | 3.47030200  | 1.03540600  |
| H | -0.42586300 | 3.12645000  | 1.55216500  |
| C | 1.82648700  | 0.95153200  | -2.82448500 |
| H | 2.89277300  | 1.15959000  | -2.94826000 |
| H | 2.74949100  | -0.48101100 | -1.32735000 |
| C | 1.20890700  | 0.24671100  | -3.83668100 |
| H | 0.11920200  | 0.07970100  | -3.73596000 |
| H | -0.80652600 | 0.71446100  | -1.98543200 |
| O | 3.13942600  | -1.13582400 | -0.71940500 |
| C | 2.88081200  | -2.41296600 | -1.30518500 |
| C | 3.55378200  | -2.51464100 | -2.66877900 |
| C | 3.47362200  | -3.41724100 | -0.32809500 |
| C | 1.37245900  | -2.61949600 | -1.43553600 |
| H | 3.16082900  | -1.77775100 | -3.38207300 |
| H | 4.63391600  | -2.34625800 | -2.57258700 |
| H | 3.40595100  | -3.50506400 | -3.12131800 |
| H | 3.00424900  | -3.31831900 | 0.65887000  |
| H | 3.32758200  | -4.44533700 | -0.68329300 |
| H | 4.54993600  | -3.24192600 | -0.20995500 |
| H | 1.13247000  | -3.62079500 | -1.81974100 |
| H | 0.88314600  | -2.48958300 | -0.46179100 |
| H | 0.94822400  | -1.88499700 | -2.13227200 |

#### IM-C7

|   |             |             |             |
|---|-------------|-------------|-------------|
| O | 3.85235500  | -2.16181100 | -5.90085700 |
| C | 1.69458500  | -1.64532000 | -6.89176600 |
| C | 1.13022600  | -0.71085100 | -5.94333500 |
| C | 0.95222300  | -2.02970500 | -8.02174200 |
| C | -0.18229300 | -0.22892700 | -6.26240100 |
| C | -0.31953600 | -1.55746400 | -8.28585000 |
| H | 1.42427200  | -2.74017000 | -8.70705800 |
| C | -0.87571700 | -0.63628800 | -7.38083400 |
| H | -0.61799900 | 0.52815700  | -5.61227800 |
| H | -0.86653000 | -1.87188000 | -9.17357900 |
| H | -1.86650100 | -0.21888500 | -7.57499300 |
| C | 3.00346200  | -2.26895200 | -6.77128500 |
| H | 3.20296600  | -2.95246900 | -7.65167800 |
| N | 1.83851800  | -0.29320500 | -4.88008700 |
| C | 1.18061600  | 1.52006600  | -1.67137800 |
| C | -0.19308300 | 1.36466600  | -1.34889800 |
| C | 1.94378100  | 2.28625900  | -0.75455300 |
| C | -0.74463700 | 1.93029600  | -0.21045100 |
| C | 1.38716200  | 2.85073600  | 0.38309100  |
| H | 3.00516000  | 2.42995800  | -0.96545000 |

|   |             |            |             |
|---|-------------|------------|-------------|
| C | 0.03208300  | 2.68330600 | 0.67474200  |
| H | -1.80649600 | 1.78019900 | -0.00569500 |
| H | 2.02014900  | 3.43367400 | 1.05477500  |
| H | -0.40794800 | 3.12526700 | 1.56815100  |
| C | 1.81048200  | 0.96759200 | -2.83556200 |
| H | 2.88126300  | 1.14979000 | -2.94748600 |
| C | 1.19822000  | 0.24429700 | -3.83332300 |
| H | 0.11176800  | 0.06100200 | -3.72512100 |
| H | -0.83117600 | 0.78102900 | -2.01200100 |

### TS-C5

|   |             |             |             |
|---|-------------|-------------|-------------|
| O | 3.80039300  | -2.83091600 | -7.18449400 |
| C | 1.54994800  | -1.96036900 | -7.38343300 |
| C | 1.47198400  | -1.12082300 | -6.21848200 |
| C | 0.45286800  | -2.05746400 | -8.25710300 |
| C | 0.23376600  | -0.44215300 | -6.02674200 |
| C | -0.73486300 | -1.38602300 | -8.03698500 |
| H | 0.56454200  | -2.70176100 | -9.13451800 |
| C | -0.83024100 | -0.57208200 | -6.89742700 |
| H | 0.15841800  | 0.19741100  | -5.14795900 |
| H | -1.57225900 | -1.48390800 | -8.72649900 |
| H | -1.75933600 | -0.03644500 | -6.69164200 |
| C | 2.72961600  | -2.73374400 | -7.75572700 |
| H | 2.56271300  | -3.29370700 | -8.72452500 |
| N | 2.50202100  | -0.87292700 | -5.39041000 |
| C | 4.12428900  | -1.96612300 | -2.20953600 |
| C | 3.35839600  | -3.06199200 | -1.72022500 |
| C | 5.22973600  | -1.59304100 | -1.39641500 |
| C | 3.67480900  | -3.71337200 | -0.54040500 |
| C | 5.54057500  | -2.24960600 | -0.21587100 |
| H | 5.84948500  | -0.75694100 | -1.72792300 |
| C | 4.77021300  | -3.32403200 | 0.23742500  |
| H | 3.05097900  | -4.54922000 | -0.21527600 |
| H | 6.40444300  | -1.91789800 | 0.36489400  |
| H | 5.01457100  | -3.84090100 | 1.16505800  |
| C | 3.83861100  | -1.25514500 | -3.41368000 |
| H | 4.49008400  | -0.41479900 | -3.66220900 |
| C | 2.80672500  | -1.54133300 | -4.29295500 |
| H | 2.17031200  | -2.40926900 | -4.04367600 |
| H | 2.49341600  | -3.40050100 | -2.29053200 |

### IM-C8

|   |            |             |            |
|---|------------|-------------|------------|
| O | 1.21348800 | 1.58290000  | 1.91919600 |
| C | 2.91152200 | 0.71540000  | 0.43279100 |
| C | 2.34362300 | -0.55341700 | 0.02273500 |
| C | 4.24764600 | 1.01682900  | 0.09675100 |

|   |             |             |             |
|---|-------------|-------------|-------------|
| C | 3.26206000  | -1.46548900 | -0.58892800 |
| C | 5.07673900  | 0.13857500  | -0.56899300 |
| H | 4.62835900  | 1.99288200  | 0.41334300  |
| C | 4.56225900  | -1.13295100 | -0.89127800 |
| H | 2.85999100  | -2.44369700 | -0.85201600 |
| H | 6.10343700  | 0.40697600  | -0.81443200 |
| H | 5.19849900  | -1.86356400 | -1.39550200 |
| C | 2.27558700  | 1.67130200  | 1.32046400  |
| H | 2.92046300  | 2.58702300  | 1.46997300  |
| N | 1.09428500  | -1.00854700 | 0.20703400  |
| C | -1.55321200 | 1.48606600  | -0.79331700 |
| C | -2.77653100 | 0.99775600  | -0.26415000 |
| C | -1.65103500 | 2.66561700  | -1.57481200 |
| C | -3.98204300 | 1.63887300  | -0.50032800 |
| C | -2.85932400 | 3.30444200  | -1.80689200 |
| H | -0.73245200 | 3.07618300  | -1.99828700 |
| C | -4.04808800 | 2.80109100  | -1.27462600 |
| H | -4.89570100 | 1.22475300  | -0.06888000 |
| H | -2.87575500 | 4.21157000  | -2.41427000 |
| H | -4.99971600 | 3.30065600  | -1.45384600 |
| C | -0.27455500 | 0.87388900  | -0.58793900 |
| H | 0.57600600  | 1.37779800  | -1.05367700 |
| C | -0.02901500 | -0.29246300 | 0.10138600  |
| H | -0.89566600 | -0.79783200 | 0.54943900  |
| H | -2.76796900 | 0.09822200  | 0.35052200  |

**TS-C6**

|   |             |             |             |
|---|-------------|-------------|-------------|
| O | 2.41322200  | 2.23235300  | 2.21226400  |
| C | 2.73300400  | 0.74916200  | 0.35663200  |
| C | 2.63002800  | -0.64447600 | 0.59974500  |
| C | 3.65446000  | 1.20104700  | -0.58355100 |
| C | 3.42771300  | -1.52210000 | -0.15471200 |
| C | 4.43256900  | 0.32136100  | -1.33841300 |
| H | 3.74072300  | 2.27890800  | -0.74335300 |
| C | 4.30846500  | -1.05021000 | -1.12060500 |
| H | 3.33266300  | -2.58982300 | 0.04623100  |
| H | 5.12183800  | 0.70308700  | -2.09271500 |
| H | 4.90610600  | -1.75490300 | -1.70154100 |
| C | 1.93674500  | 1.78592900  | 1.14120800  |
| H | 1.43416500  | 2.49422000  | 0.41822700  |
| N | 1.85125600  | -1.17202300 | 1.62827000  |
| C | -0.69918600 | 1.50757800  | 2.01540100  |
| C | -1.79045600 | 2.07560900  | 1.33056400  |
| C | -0.57072700 | 1.80938300  | 3.38777100  |
| C | -2.72773200 | 2.86424700  | 1.98537300  |

|   |             |             |            |
|---|-------------|-------------|------------|
| C | -1.51316900 | 2.59308200  | 4.04183600 |
| H | 0.31390100  | 1.45335600  | 3.91437100 |
| C | -2.60504400 | 3.12140200  | 3.35217700 |
| H | -3.56827100 | 3.27986700  | 1.42664200 |
| H | -1.38566700 | 2.81159100  | 5.10348700 |
| H | -3.34229600 | 3.73670600  | 3.86831200 |
| C | 0.31395300  | 0.71127700  | 1.34976800 |
| H | 0.16901100  | 0.57410500  | 0.27234500 |
| C | 0.83809300  | -0.45369700 | 2.01431100 |
| H | 0.38411100  | -0.74751800 | 2.97457700 |
| H | -1.89779900 | 1.87609400  | 0.26220800 |

**IM-C9**

|   |             |             |             |
|---|-------------|-------------|-------------|
| O | 1.14265800  | 1.15367000  | 0.80745600  |
| C | 1.53675300  | -0.24717800 | -1.02850500 |
| C | 1.49296000  | -1.62959800 | -0.74522900 |
| C | 2.53852400  | 0.22700400  | -1.87364500 |
| C | 2.43413500  | -2.49001400 | -1.33015400 |
| C | 3.45487000  | -0.63287900 | -2.47514200 |
| H | 2.57734000  | 1.30118100  | -2.07120000 |
| C | 3.40048500  | -2.00231100 | -2.20153900 |
| H | 2.37651100  | -3.55102900 | -1.08341800 |
| H | 4.20823700  | -0.24103800 | -3.16076500 |
| H | 4.11595700  | -2.68462300 | -2.66269300 |
| C | 0.60956500  | 0.72539500  | -0.29975700 |
| H | 0.30144800  | 1.51591300  | -1.06125800 |
| N | 0.57447000  | -2.18041500 | 0.16157000  |
| C | -1.78278700 | 0.63695300  | 0.64612000  |
| C | -2.97799000 | 1.10156600  | 0.08799100  |
| C | -1.50018700 | 0.95889200  | 1.98509700  |
| C | -3.88423800 | 1.84409500  | 0.84149100  |
| C | -2.40254900 | 1.70682000  | 2.73564200  |
| H | -0.53014100 | 0.65903400  | 2.37856200  |
| C | -3.60139300 | 2.14578300  | 2.17341500  |
| H | -4.81636900 | 2.18601800  | 0.38923000  |
| H | -2.16648200 | 1.95801600  | 3.77072300  |
| H | -4.31026700 | 2.72308100  | 2.76820400  |
| C | -0.77700000 | -0.13038300 | -0.12120900 |
| H | -1.11754000 | -0.31001400 | -1.15641800 |
| C | -0.42884800 | -1.44097100 | 0.49004900  |
| H | -1.06815900 | -1.81932900 | 1.30217100  |
| H | -3.19780100 | 0.86970300  | -0.95640700 |

**IM-C10**

|   |            |            |             |
|---|------------|------------|-------------|
| O | 1.07437200 | 1.25830000 | 0.67520800  |
| C | 1.61306400 | 0.26807900 | -1.40094300 |

|              |             |             |             |
|--------------|-------------|-------------|-------------|
| C            | 1.77802400  | -1.13088000 | -1.34895300 |
| C            | 2.51908700  | 1.01948600  | -2.14665200 |
| C            | 2.81924500  | -1.73983600 | -2.06111900 |
| C            | 3.53987400  | 0.41010100  | -2.87215000 |
| H            | 2.41853500  | 2.10602700  | -2.14528800 |
| C            | 3.68801000  | -0.97794300 | -2.83291200 |
| H            | 2.92323400  | -2.82258300 | -1.98821400 |
| H            | 4.22495200  | 1.01704800  | -3.46522800 |
| H            | 4.48980100  | -1.46170600 | -3.39172900 |
| C            | 0.56940300  | 0.94425700  | -0.51726700 |
| H            | 0.15857600  | 1.81814500  | -1.10269400 |
| N            | 0.97110400  | -1.95134500 | -0.53967400 |
| C            | -1.72454400 | 0.38580800  | 0.47128100  |
| C            | -2.99273400 | 0.74606800  | 0.00874400  |
| C            | -1.46005300 | 0.48752000  | 1.84568800  |
| C            | -3.98057800 | 1.18835200  | 0.88621800  |
| C            | -2.44397600 | 0.93373000  | 2.72228500  |
| H            | -0.45265300 | 0.25526400  | 2.18541300  |
| C            | -3.70889400 | 1.28146000  | 2.24943400  |
| H            | -4.96549200 | 1.45974700  | 0.50418700  |
| H            | -2.22095600 | 1.01676700  | 3.78649000  |
| H            | -4.47897500 | 1.62588800  | 2.94034000  |
| C            | -0.64480400 | -0.07787300 | -0.44351900 |
| H            | -1.03353600 | -0.14885200 | -1.47704600 |
| C            | -0.11050700 | -1.43044300 | -0.08272600 |
| H            | -0.69156300 | -2.04238900 | 0.62226100  |
| H            | -3.20468200 | 0.67748400  | -1.06032900 |
| H            | 2.46386000  | 2.19489400  | 0.59494900  |
| O            | 3.37013800  | 2.63049900  | 0.63071700  |
| C            | 4.12891600  | 1.83720500  | 1.51892000  |
| C            | 4.13771300  | 0.37619600  | 1.06539000  |
| C            | 5.53958800  | 2.41220000  | 1.49955200  |
| C            | 3.53303200  | 1.93181700  | 2.92692100  |
| H            | 3.10773200  | -0.00129900 | 1.05268400  |
| H            | 4.53533000  | 0.29492800  | 0.04511400  |
| H            | 4.74680000  | -0.25463100 | 1.73075900  |
| H            | 5.52554700  | 3.46868200  | 1.79793400  |
| H            | 6.20710300  | 1.86673700  | 2.18125000  |
| H            | 5.95626100  | 2.35429800  | 0.48602400  |
| H            | 4.10263900  | 1.34168500  | 3.66124600  |
| H            | 3.51562700  | 2.97762500  | 3.26127100  |
| H            | 2.50064700  | 1.56236200  | 2.90778300  |
| <b>TS-C7</b> |             |             |             |
| O            | 0.17668500  | -2.14402100 | -1.89136700 |

|   |             |             |             |
|---|-------------|-------------|-------------|
| C | -1.67870600 | -0.90556600 | -0.97564200 |
| C | -2.07954600 | -1.40934800 | 0.28385000  |
| C | -2.64356400 | -0.52394700 | -1.90373300 |
| C | -3.45255400 | -1.52745900 | 0.55180100  |
| C | -4.00419900 | -0.63407300 | -1.62167700 |
| H | -2.31401500 | -0.11142800 | -2.86105900 |
| C | -4.40301900 | -1.14549500 | -0.38560200 |
| H | -3.74357400 | -1.90813100 | 1.53060900  |
| H | -4.74581200 | -0.31651000 | -2.35447600 |
| H | -5.46410300 | -1.23484300 | -0.14901800 |
| C | -0.21320500 | -0.87932200 | -1.30715500 |
| H | -0.00176100 | -0.06679700 | -2.02427300 |
| N | -1.17959700 | -1.76444900 | 1.28589600  |
| C | 2.07436600  | -0.72109000 | -0.22573700 |
| C | 2.77107900  | -1.92846200 | -0.08416300 |
| C | 2.80349600  | 0.43368400  | -0.54590000 |
| C | 4.15172500  | -1.98676000 | -0.25136900 |
| C | 4.18339600  | 0.37250400  | -0.72210100 |
| H | 2.24913500  | 1.37316200  | -0.61942400 |
| C | 4.86548400  | -0.83444400 | -0.57475500 |
| H | 4.67253500  | -2.93882200 | -0.13787500 |
| H | 4.73623200  | 1.28063700  | -0.96754500 |
| H | 5.94715000  | -0.87747600 | -0.70921800 |
| C | 0.58714700  | -0.65167600 | -0.04198200 |
| H | 0.33494600  | 0.55514900  | 0.11878000  |
| C | 0.06121000  | -1.41891200 | 1.07417100  |
| H | 0.76081500  | -1.66016200 | 1.88743900  |
| H | 2.20587200  | -2.83390000 | 0.13997900  |
| H | -0.48918400 | -2.33655300 | -2.56753900 |
| O | 0.16634400  | 1.96889000  | -0.12144200 |
| C | -0.25107800 | 2.57337300  | 1.04085400  |
| C | -0.47063400 | 4.06867800  | 0.75631300  |
| C | -1.57677600 | 1.96797000  | 1.54342600  |
| C | 0.80866900  | 2.43495600  | 2.15325300  |
| H | 0.46197800  | 4.51537900  | 0.38607800  |
| H | -1.22983900 | 4.18896400  | -0.02768000 |
| H | -0.79724900 | 4.63195800  | 1.64589200  |
| H | -1.44053900 | 0.91281600  | 1.81857500  |
| H | -1.98406000 | 2.49431900  | 2.42254000  |
| H | -2.32595100 | 1.99984100  | 0.74040700  |
| H | 0.51544600  | 2.92188500  | 3.09813100  |
| H | 0.99502900  | 1.37294500  | 2.36649400  |
| H | 1.75869300  | 2.87408100  | 1.81861500  |

IM-C11

|   |             |             |             |
|---|-------------|-------------|-------------|
| O | -0.01444400 | -2.86015100 | -1.42075800 |
| C | -1.64528900 | -1.22089700 | -0.67281300 |
| C | -2.05291100 | -1.29387700 | 0.68788400  |
| C | -2.59846400 | -1.01049200 | -1.67174000 |
| C | -3.43836800 | -1.21449700 | 0.96059500  |
| C | -3.95577200 | -0.91079200 | -1.38085800 |
| H | -2.25488500 | -0.92082200 | -2.70746100 |
| C | -4.36833200 | -1.03090500 | -0.04756400 |
| H | -3.74277700 | -1.27287100 | 2.00603700  |
| H | -4.68304100 | -0.74483700 | -2.17541400 |
| H | -5.42904000 | -0.96243600 | 0.20108400  |
| C | -0.20790700 | -1.45954300 | -1.02278800 |
| H | 0.07100700  | -0.84264000 | -1.90241900 |
| N | -1.17917800 | -1.35790200 | 1.74358300  |
| C | 2.09950300  | -0.96468000 | -0.07538500 |
| C | 2.71060900  | -1.32200400 | -1.30091700 |
| C | 2.94974100  | -0.39179600 | 0.90059100  |
| C | 4.06582900  | -1.12061700 | -1.52723400 |
| C | 4.30577100  | -0.20789500 | 0.67498900  |
| H | 2.52458600  | -0.06243900 | 1.84836000  |
| C | 4.88450700  | -0.56546400 | -0.54405200 |
| H | 4.49460700  | -1.41797700 | -2.48609800 |
| H | 4.91969600  | 0.24118000  | 1.45792100  |
| H | 5.94865200  | -0.41185000 | -0.72255700 |
| C | 0.67692300  | -1.15590900 | 0.13806700  |
| H | 0.18821200  | 0.99225700  | -0.18019800 |
| C | 0.10874000  | -1.23988800 | 1.41065800  |
| H | 0.78841500  | -1.19990100 | 2.27239500  |
| H | 2.10239300  | -1.80903000 | -2.06139900 |
| H | -0.78197000 | -3.06825800 | -1.97586900 |
| O | 0.10420900  | 1.92887200  | -0.45223100 |
| C | -0.32392700 | 2.66147500  | 0.68947400  |
| C | -0.33949400 | 4.11497800  | 0.23910100  |
| C | -1.71826100 | 2.21302600  | 1.12066600  |
| C | 0.66617400  | 2.46395400  | 1.83607100  |
| H | 0.65939000  | 4.42179000  | -0.09455600 |
| H | -1.03087300 | 4.24341500  | -0.60256200 |
| H | -0.65626200 | 4.77937300  | 1.05355700  |
| H | -1.69784600 | 1.17777600  | 1.48446700  |
| H | -2.11084000 | 2.84586800  | 1.93004000  |
| H | -2.41355900 | 2.25971600  | 0.27315200  |
| H | 0.40561800  | 3.07749100  | 2.71029600  |
| H | 0.66494900  | 1.41222600  | 2.15304100  |
| H | 1.68299100  | 2.72070300  | 1.51400700  |

**IM-C12**

|   |             |             |             |
|---|-------------|-------------|-------------|
| C | -1.08361200 | 0.83334200  | -0.24018700 |
| C | -1.92407500 | 0.55647600  | 0.87454900  |
| C | -1.65133200 | 1.17352000  | -1.47065000 |
| C | -3.32285900 | 0.59448000  | 0.66540500  |
| C | -3.02827100 | 1.23208600  | -1.64723200 |
| H | -0.98639400 | 1.37184400  | -2.31459700 |
| C | -3.86390100 | 0.92625800  | -0.56345000 |
| H | -3.95818100 | 0.36893500  | 1.52237700  |
| H | -3.44996900 | 1.49443500  | -2.61740200 |
| H | -4.94817200 | 0.95537300  | -0.68739800 |
| C | 0.39407900  | 0.67765200  | -0.10285400 |
| H | 0.93122100  | 1.39819000  | -0.74029500 |
| N | -1.45722900 | 0.28568000  | 2.13588300  |
| C | 2.20912100  | 0.98280200  | 1.64271000  |
| C | 3.22905700  | 0.88562500  | 0.66429000  |
| C | 2.62756300  | 1.36877600  | 2.93975300  |
| C | 4.55814400  | 1.15542200  | 0.96386000  |
| C | 3.95893600  | 1.61873400  | 3.23709200  |
| H | 1.87739800  | 1.50454400  | 3.71786600  |
| C | 4.94541000  | 1.51948600  | 2.25346300  |
| H | 5.30941700  | 1.06301600  | 0.17738800  |
| H | 4.23092100  | 1.91735600  | 4.25128800  |
| H | 5.98954500  | 1.72597900  | 2.48722400  |
| C | 0.82082100  | 0.72979300  | 1.31477300  |
| C | -0.14078500 | 0.43511000  | 2.28503700  |
| H | 0.21092900  | 0.29284900  | 3.31535800  |
| H | 2.95903800  | 0.55207600  | -0.33644700 |
| H | 0.68649000  | -1.27827700 | -0.05400800 |
| H | 0.02557400  | -1.08852200 | -2.34773600 |
| C | -1.07287100 | -2.62593700 | -2.80702800 |
| C | -0.05362100 | -3.70621100 | -2.43511400 |
| H | 0.53721900  | -3.39324500 | -1.56450300 |
| H | -0.53654400 | -4.66264600 | -2.18763600 |
| H | 0.64318200  | -3.87344100 | -3.26601800 |
| C | -2.02868100 | -2.37368400 | -1.64342900 |
| H | -1.48032200 | -2.04159100 | -0.75306500 |
| H | -2.73517400 | -1.57328800 | -1.89210400 |
| H | -2.59319500 | -3.27915600 | -1.37875200 |
| C | -1.84754800 | -3.04452700 | -4.04898600 |
| H | -2.56744500 | -2.26441200 | -4.32318400 |
| H | -1.16289300 | -3.18542500 | -4.89486100 |
| H | -2.39444800 | -3.98193700 | -3.88306000 |
| O | -0.39443800 | -1.43450100 | -3.16864200 |

|              |             |             |             |
|--------------|-------------|-------------|-------------|
| O            | 0.83559500  | -0.61649900 | -0.74840800 |
| <b>TS-C8</b> |             |             |             |
| C            | -1.19405600 | -1.61644800 | -0.99916700 |
| C            | -1.90091700 | -1.30319200 | 0.20076800  |
| C            | -1.91246200 | -1.79159200 | -2.19997400 |
| C            | -3.30808100 | -1.16952100 | 0.13637100  |
| C            | -3.28624400 | -1.65121800 | -2.23109800 |
| H            | -1.36268400 | -2.09395700 | -3.09359200 |
| C            | -3.98763100 | -1.33509600 | -1.05220300 |
| H            | -3.82808500 | -0.93049100 | 1.06383400  |
| H            | -3.82817500 | -1.80077800 | -3.16518900 |
| H            | -5.07300100 | -1.22747500 | -1.07809100 |
| C            | 0.23284600  | -1.76563400 | -0.94238000 |
| H            | 0.80000300  | -1.67172900 | -1.86463200 |
| N            | -1.28661200 | -1.10799200 | 1.40866200  |
| C            | 2.31600800  | -1.47485500 | 0.41107300  |
| C            | 3.08896700  | -2.32695300 | -0.40141700 |
| C            | 2.99308800  | -0.64770000 | 1.32579200  |
| C            | 4.47545200  | -2.33614700 | -0.30245700 |
| C            | 4.37959100  | -0.66854700 | 1.42681200  |
| H            | 2.41777800  | 0.04036700  | 1.94606000  |
| C            | 5.13318100  | -1.50959700 | 0.60879800  |
| H            | 5.05218500  | -3.01008400 | -0.93717400 |
| H            | 4.87793100  | -0.01025400 | 2.13979100  |
| H            | 6.22074300  | -1.52113300 | 0.68293900  |
| C            | 0.85882500  | -1.46521900 | 0.28697200  |
| C            | 0.03453400  | -1.19559400 | 1.39578000  |
| H            | 0.52071500  | -1.03688900 | 2.36625600  |
| H            | 2.55760200  | -3.01764300 | -1.05752100 |
| H            | -0.22853200 | -4.12246700 | -0.86461600 |
| H            | 0.24483700  | -3.72830600 | -2.98762100 |
| C            | -0.43238200 | -5.03650200 | -4.24751500 |
| C            | 0.54887400  | -6.09699600 | -3.74109600 |
| H            | 0.74025300  | -5.92010500 | -2.67478400 |
| H            | 0.16774800  | -7.11990700 | -3.88007300 |
| H            | 1.50552500  | -6.00835600 | -4.27201100 |
| C            | -1.77993600 | -5.20026600 | -3.53902500 |
| H            | -1.64557900 | -5.04586800 | -2.46126500 |
| H            | -2.49324800 | -4.44553700 | -3.89424700 |
| H            | -2.21791700 | -6.19693600 | -3.69881000 |
| C            | -0.61328100 | -5.14666100 | -5.75542400 |
| H            | -1.29833500 | -4.36788300 | -6.11399600 |
| H            | 0.34909500  | -5.00650800 | -6.26327100 |
| H            | -1.01978500 | -6.12624000 | -6.04330200 |

|               |             |             |             |
|---------------|-------------|-------------|-------------|
| O             | 0.09336800  | -3.75164700 | -3.99507300 |
| O             | 0.51796000  | -3.80518200 | -1.39238200 |
| <b>IM-C13</b> |             |             |             |
| C             | -1.40939400 | 0.93724900  | 0.28114400  |
| C             | -2.12721200 | 1.66777000  | 1.27699900  |
| C             | -2.10105900 | 0.42241200  | -0.84589600 |
| C             | -3.51700400 | 1.87075500  | 1.11092600  |
| C             | -3.45480000 | 0.63657300  | -0.97368200 |
| H             | -1.54497600 | -0.13972300 | -1.60447900 |
| C             | -4.16556100 | 1.36455700  | 0.00657600  |
| H             | -4.04456400 | 2.42955600  | 1.88312100  |
| H             | -3.98344400 | 0.23851900  | -1.84041700 |
| H             | -5.23794300 | 1.52363700  | -0.11290200 |
| C             | -0.02137700 | 0.74317000  | 0.45165900  |
| H             | 0.51989500  | 0.11921400  | -0.29027000 |
| N             | -1.51649600 | 2.16318500  | 2.39336100  |
| C             | 2.05118800  | 1.07541600  | 1.81323200  |
| C             | 2.77551100  | 0.11107200  | 1.08387500  |
| C             | 2.74495800  | 1.85082900  | 2.75756000  |
| C             | 4.13475400  | -0.06288100 | 1.32070600  |
| C             | 4.10455500  | 1.66645400  | 2.98642300  |
| H             | 2.22258300  | 2.63046600  | 3.31096000  |
| C             | 4.80893400  | 0.70189800  | 2.27101200  |
| H             | 4.67391800  | -0.81547400 | 0.74492300  |
| H             | 4.61547600  | 2.28741400  | 3.72305100  |
| H             | 5.87501500  | 0.55521900  | 2.44736800  |
| C             | 0.60353800  | 1.25789000  | 1.57876000  |
| C             | -0.22172500 | 1.94967300  | 2.51015500  |
| H             | 0.22322300  | 2.33523100  | 3.43270600  |
| H             | 2.28241300  | -0.50590900 | 0.30953400  |
| H             | 0.72389600  | -1.95590900 | -0.47860100 |
| H             | 0.30979700  | -1.31830200 | -2.28486700 |
| C             | -0.78154300 | -2.64566600 | -3.26018400 |
| C             | 0.46426900  | -3.52073700 | -3.43901400 |
| H             | 1.12636600  | -3.34806100 | -2.57954800 |
| H             | 0.21994000  | -4.59136100 | -3.51924000 |
| H             | 1.00715900  | -3.22049800 | -4.34526400 |
| C             | -1.58547700 | -3.14546100 | -2.05226000 |
| H             | -0.97189400 | -3.06868100 | -1.14586800 |
| H             | -2.47914500 | -2.52444300 | -1.90424500 |
| H             | -1.90614000 | -4.19275500 | -2.16367500 |
| C             | -1.65721600 | -2.69044700 | -4.50756400 |
| H             | -2.53472300 | -2.04285500 | -4.37645000 |
| H             | -1.09604100 | -2.32097200 | -5.37506700 |

|           |             |             |             |
|-----------|-------------|-------------|-------------|
| H         | -2.00799300 | -3.70973300 | -4.72663600 |
| O         | -0.39568100 | -1.30880800 | -3.07582100 |
| O         | 1.24658900  | -1.45197800 | -1.12136900 |
| <b>3a</b> |             |             |             |
| C         | 1.66785300  | -2.64361000 | -1.72729500 |
| C         | 1.18500200  | -2.53187600 | -3.03966800 |
| C         | 2.56630900  | -1.66968300 | -1.26764300 |
| C         | 1.58171300  | -1.48346800 | -3.86071400 |
| C         | 2.96465900  | -0.62165900 | -2.08961900 |
| H         | 2.93313700  | -1.71821500 | -0.24330400 |
| C         | 2.47428400  | -0.52336000 | -3.38914000 |
| H         | 1.19939100  | -1.42118200 | -4.87822900 |
| H         | 3.65604300  | 0.12807100  | -1.70899100 |
| H         | 2.78597100  | 0.29763600  | -4.03221400 |
| C         | 1.24054900  | -3.74851300 | -0.85570100 |
| C         | 2.12124900  | -4.28876000 | 0.12543600  |
| H         | 3.13412300  | -3.88354300 | 0.20033600  |
| H         | 0.50982300  | -3.29490500 | -3.42602900 |
| C         | -0.37773100 | -5.37688100 | -0.08371300 |
| C         | 0.59334800  | -5.82398100 | 0.86631500  |
| C         | -1.64911600 | -5.99815100 | -0.11384800 |
| C         | 0.25844700  | -6.87806100 | 1.74695200  |
| C         | -1.94547700 | -7.02090100 | 0.75566900  |
| H         | -2.38688800 | -5.65161200 | -0.83769900 |
| C         | -0.98508800 | -7.46375600 | 1.69171100  |
| H         | 1.01522500  | -7.20115400 | 2.45875300  |
| H         | -2.92495700 | -7.49482200 | 0.72518300  |
| H         | -1.23487600 | -8.27519500 | 2.37303200  |
| C         | -0.01458500 | -4.31918400 | -0.94176000 |
| H         | -0.74703700 | -3.93931600 | -1.65582200 |
| N         | 1.83557800  | -5.26922100 | 0.95043200  |
